# Supplementary material for: Prospective double-blind randomised controlled trial protocol comparing bone marrow aspirate concentrate intra-articular injection combined with subchondral injection versus intra-articular injection alone for the treatment of symptomatic knee osteoarthritis
Source: PubMed Central journal article supplement — BMJ Open. 2022 Sep 8;12(9):e062632. doi: 10.1136/bmjopen-2022-062632 (PMC9462121; doi:10.1136/bmjopen-2022-062632), 2022-09-08
Supplement: bmjopen-2022-062632.draft_revisions.pdf [file bmjopen-2022-062632.draft_revisions.pdf]

# BMJ Open

BMJ Open is committed to open peer review. As part of this commitment we make the peer review history of every article we publish publicly available.

When an article is published we post the peer reviewers' comments and the authors' responses online. We also post the versions of the paper that were used during peer review. These are the versions that the peer review comments apply to.

The versions of the paper that follow are the versions that were submitted during the peer review process. They are not the versions of record or the final published versions. They should not be cited or distributed as the published version of this manuscript.

BMJ Open is an open access journal and the full, final, typeset and author-corrected version of record of the manuscript is available on our site with no access controls, subscription charges or pay-per-view fees (<http://bmjopen.bmj.com>).

If you have any questions on BMJ Open's open peer review process please email [info.bmjopen@bmj.com](mailto:info.bmjopen@bmj.com)

# BMJ Open

**A prospective double-blind randomized controlled trial protocol comparing bone marrow aspirate concentrate intra-articular injection combined with subchondral injection versus intra-articular injection alone for the treatment of symptomatic knee osteoarthritis.**

|                               |                                                                                                                                                                                                                                                                                                                                                                                                                                                                                                                                                                                                                                                                                                                                                                                                                                                                                                                                                                                                                                                                                                                                                                                                                                                                                    |
|-------------------------------|------------------------------------------------------------------------------------------------------------------------------------------------------------------------------------------------------------------------------------------------------------------------------------------------------------------------------------------------------------------------------------------------------------------------------------------------------------------------------------------------------------------------------------------------------------------------------------------------------------------------------------------------------------------------------------------------------------------------------------------------------------------------------------------------------------------------------------------------------------------------------------------------------------------------------------------------------------------------------------------------------------------------------------------------------------------------------------------------------------------------------------------------------------------------------------------------------------------------------------------------------------------------------------|
| Journal:                      | <i>BMJ Open</i>                                                                                                                                                                                                                                                                                                                                                                                                                                                                                                                                                                                                                                                                                                                                                                                                                                                                                                                                                                                                                                                                                                                                                                                                                                                                    |
| Manuscript ID                 | bmjopen-2022-062632                                                                                                                                                                                                                                                                                                                                                                                                                                                                                                                                                                                                                                                                                                                                                                                                                                                                                                                                                                                                                                                                                                                                                                                                                                                                |
| Article Type:                 | Protocol                                                                                                                                                                                                                                                                                                                                                                                                                                                                                                                                                                                                                                                                                                                                                                                                                                                                                                                                                                                                                                                                                                                                                                                                                                                                           |
| Date Submitted by the Author: | 08-Mar-2022                                                                                                                                                                                                                                                                                                                                                                                                                                                                                                                                                                                                                                                                                                                                                                                                                                                                                                                                                                                                                                                                                                                                                                                                                                                                        |
| Complete List of Authors:     | <p>Silva, Simone; IRCCS Istituto Ortopedico Rizzoli, II Orthopaedic and Traumatologic Clinic<br/>         Andriolo, Luca; IRCCS Istituto Ortopedico Rizzoli, II Orthopaedic and Traumatologic Clinic<br/>         Boffa, Angelo ; IRCCS Istituto Ortopedico Rizzoli, II Orthopaedic and Traumatologic Clinic<br/>         Di Martino, Alessandro; IRCCS Istituto Ortopedico Rizzoli, II Orthopaedic and Traumatologic Clinic<br/>         Reale, Davide; IRCCS Istituto Ortopedico Rizzoli, Orthopaedic and Traumatologic Clinic, Mazzolani Vandini Hospital<br/>         Vara, Giulio; IRCCS Istituto Ortopedico Rizzoli, Diagnostic and Interventional Radiology<br/>         Marco, Miceli; IRCCS Istituto Ortopedico Rizzoli, Diagnostic and Interventional Radiology<br/>         Cavallo, Carola; IRCCS Istituto Ortopedico Rizzoli, Laboratory RAMSES, Research &amp; Innovation Technology Department<br/>         Grigolo, Brunella; IRCCS Istituto Ortopedico Rizzoli, Laboratory RAMSES, Research &amp; Innovation Technology Department<br/>         Zaffagnini, Stefano ; IRCCS Istituto Ortopedico Rizzoli, II Orthopaedic and Traumatologic Clinic<br/>         Filardo, Giuseppe; IRCCS Istituto Ortopedico Rizzoli, Applied and Translational Research Center</p> |
| Keywords:                     | <p>ORTHOPAEDIC &amp; TRAUMA SURGERY, Adult orthopaedics &lt;<br/>         ORTHOPAEDIC &amp; TRAUMA SURGERY, Orthopaedic &amp; trauma surgery &lt;<br/>         SURGERY, Knee &lt; ORTHOPAEDIC &amp; TRAUMA SURGERY</p>                                                                                                                                                                                                                                                                                                                                                                                                                                                                                                                                                                                                                                                                                                                                                                                                                                                                                                                                                                                                                                                             |
|                               |                                                                                                                                                                                                                                                                                                                                                                                                                                                                                                                                                                                                                                                                                                                                                                                                                                                                                                                                                                                                                                                                                                                                                                                                                                                                                    |

SCHOLARONE™  
Manuscripts

1  
2  
3 1 **A prospective double-blind randomized controlled trial protocol comparing**  
4  
5 2 **bone marrow aspirate concentrate intra-articular injection combined with**  
6  
7 3 **subchondral injection versus intra-articular injection alone**  
8  
9  
10 4 **for the treatment of symptomatic knee osteoarthritis.**  
11  
12 5

13  
14  
15 6 Simone Silva<sup>1</sup>, Luca Andriolo<sup>1</sup>, Angelo Boffa<sup>1</sup>, Alessandro Di Martino<sup>1</sup>, Davide Reale<sup>2</sup>, Giulio  
16  
17 7 Vara<sup>3</sup>, Marco Miceli<sup>3</sup>, Carola Cavallo<sup>4</sup>, Brunella Grigolo<sup>4</sup>, Stefano Zaffagnini<sup>1</sup>, Giuseppe Filardo<sup>5</sup>  
18  
19 8

20  
21  
22 9 (1) II Orthopaedic and Traumatologic Clinic, IRCCS Istituto Ortopedico Rizzoli, Bologna, Italy

23  
24 10 (2) Orthopaedic and Traumatologic Clinic, Mazzolani Vandini Hospital, Argenta, Italy

25  
26 11 (3) Diagnostic and Interventional Radiology, IRCCS Istituto Ortopedico Rizzoli, Bologna, Italy

27  
28 12 (4) Laboratory RAMSES, Research & Innovation Technology Department, IRCCS Istituto

29  
30  
31 13 Ortopedico Rizzoli, Bologna, Italy

32  
33 14 (5) Applied and Translational Research center (ATRC), IRCCS Istituto Ortopedico Rizzoli,

34  
35 15 Bologna, Italy  
36  
37 16  
38  
39

40 17 *Corresponding author:*

41  
42 18 Simone Silva, MD, II Orthopaedic and Traumatologic Clinic, IRCCS Istituto Ortopedico Rizzoli,

43  
44 19 Via Di Barbiano,1/10 - 40136 Bologna, Italy. Tel. +39 051 6366567. Fax +39 051 583789

45  
46 20 E-mail: simone.silva.dls@gmail.com. ORCID-ID: 0000-0003-0955-4475  
47  
48  
49 21

50  
51 22 *Keywords:* Osteoarthritis; Mesenchymal Stromal Cells; Subchondral injections; Bone marrow  
52  
53 23 aspirate concentrate; BMAC  
54  
55 24

56  
57  
58 25 *Word Count:* 3692 words (excluding title page, references, figures and tables)  
59  
60  
26

1  
2  
3 **27 ABSTRACT**  
4  
5

6 **28** *Introduction:* Subchondral and intra-articular injections of bone marrow aspirate concentrate  
7  
8 **29** (BMAC) showed promising results for knee OA patients. To date, there is no evidence to  
9  
10 **30** demonstrate whether the combination of these treatments provides higher benefits than the intra-  
11  
12 **31** articular injection alone.  
13  
14  
15

16 **32** *Methods and analysis:* Eighty-six patients with symptomatic knee OA (aged between 40 and 70) are  
17  
18 **33** randomized to BMAC intra-articular injection combined with subchondral BMAC injection or  
19  
20 **34** BMAC intra-articular injection alone in a ratio of 1:1. The primary outcome is the Western Ontario  
21  
22 **35** and McMaster Universities Osteoarthritis Index (WOMAC), the secondary outcomes the  
23  
24 **36** International Knee Documentation Committee (IKDC) Subjective and Objective Knee Evaluation  
25  
26 **37** Form, the Tegner activity scale, the EuroQol-visual analogue scale (EQ-VAS), and the health  
27  
28 **38** questionnaire EQ-5D score. Additional CT and MRI evaluations will be performed at the baseline  
29  
30 **39** assessment and at the final 12-month follow-up. The hypothesis is that the combined injection  
31  
32 **40** provides higher knee pain and function improvement compared to BMAC intra-articular injection  
33  
34 **41** alone. The primary analysis follows an intention-to-treat principle.  
35  
36  
37  
38  
39

40 **42** *Ethics and dissemination:* The study protocol has been approved by the Emilia Wide Area Ethical  
41  
42 **43** Committee of the Emilia-Romagna Region (CE-AVEC), Bologna, Italy. Written informed consent  
43  
44 **44** is obtained from all the participants. findings of this study will be disseminated the through peer-  
45  
46 **45** reviewed publications and conference presentations.  
47  
48  
49  
50  
51  
52  
53  
54  
55  
56  
57  
58  
59  
60

1  
2  
3 47 *Strengths and limitations of this study:*  
4  
5  
6 48  
7

- 8 49       •       The study design is a prospective, randomized, double-blinded and controlled trial  
9  
10 50       •       This is the first RCT evaluating results of BMAC intra-articular injection combined  
11  
12 with subchondral injection compared to BMAC intra-articular injection alone in knee OA.  
13 51  
14  
15 52       •       Patients are analyzed using PROMs, objective measures, MRI and CT examination,  
16  
17 and biomarker evaluation.  
18 53  
19  
20 54       •       Patient base-line characteristics and disease-related factors can help to better define  
21  
22 the aspects that make different individuals more or less responsive to this type of treatments.  
23 55  
24  
25 56       •       This study can clarify the benefits, and limitations, of the newly proposed  
26  
27 combination of intra-articular and subchondral BMAC injections, providing clear  
28  
29 indications for the clinical practice.  
30 58  
31  
32 59

33  
34 60 *Trial registration:* Clinical Trials.gov Identifier number NCT03876795  
35  
36 61

37  
38 62 *Protocol version:* Version 1 (14 May 2018)  
39  
40  
41 63

42  
43 64 *Ethical approval:* (Prot. n. 0003132) for study protocol Interface (identifier: 207/2018/Sper/IOR)  
44  
45 65 was obtained on 5 May 2018 from the Ethical Committee Area Vasta Emilia Centro (CE-AVEC) of  
46  
47 the Emilia-Romagna Region settled at the University General Hospital Sant'Orsola-Malpighi of  
48 66  
49  
50 67 Bologna.  
51  
52 68  
53  
54 69  
55  
56  
57 70  
58  
59 71  
60  
72

73 *Roles and responsibilities:*

74 Simone Silva<sup>1</sup> (simone.silva@ior.it): Physician and investigator

75 Luca Andriolo<sup>1</sup> (lucas.andriolo@ior.it): Physician and investigator

76 Angelo Boffa<sup>1</sup> (angeloboffa@libero.it): Physician and investigator

77 Alessandro Di Martino<sup>1</sup> (aledimartino75@gmail.com): Senior physician and principal investigator

78 Davide Reale<sup>2</sup> (dawidh.reale@gmail.com): Physician and investigator

79 Giulio Vara<sup>3</sup> (giulio.vara@gmail.com): Physician and imaging evaluator

80 Marco Miceli<sup>3</sup> (marco.miceli@ior.it): Physicians and senior imaging evaluator

81 Carola Cavallo<sup>4</sup> (carola.cavallo@ior.it): Biologist for products and patients' characterization

82 Brunella Grigolo<sup>4</sup> (brunella.grigolo@ior.it): Senior biologist for products and patients' characterization

84 Stefano Zaffagnini<sup>1</sup> (stefano.zaffagnini@unibo.it): Senior physician and investigator

85 Giuseppe Filardo<sup>5</sup> (ortho@gfilardo.com): Senior author, project PI, coordinator

87 (1) II Orthopaedic and Traumatologic Clinic, IRCCS Istituto Ortopedico Rizzoli, 40136 Bologna, Italy

89 (2) Orthopaedic and Traumatologic Clinic, Mazzolani Vandini Hospital, 44011 Argenta, Italy

90 (3) Diagnostic and Interventional Radiology, IRCCS Istituto Ortopedico Rizzoli, Bologna 40136, Italy

92 (4) Laboratory RAMSES, Research & Innovation Technology Department, IRCCS Istituto Ortopedico Rizzoli, 40136 Bologna, Italy

94 (5) Applied and Translational Research center (ATRC), IRCCS Istituto Ortopedico Rizzoli, 40136 Bologna, Italy

## 97 INTRODUCTION

98

99 Knee osteoarthritis (OA) is a chronic, degenerative disease leading to irreversible structural and  
100 functional changes in the entire joint, including subchondral bone sclerosis and cartilage loss, and  
101 progressively determines debilitating pain and loss of function.[1-2] It affects a large part of the  
102 aging population with a high impact on patients and healthcare costs.[3] Total knee arthroplasty  
103 represents a definitive solution to address knee OA, but it is also encumbered by several  
104 complications.[4] Conservative approaches, such as physical therapy and anti-inflammatory drugs,  
105 should be pursued, but their benefits are generally temporary with short-term relief, and they are not  
106 able to affect the natural course of the disease progression.[5] Thus, to delay or avoid the need for  
107 arthroplasty, research efforts have been made to find new minimally invasive and more effective  
108 procedures to address knee OA.

109 In this light, the use of orthobiologics is gaining increasing interest due to the availability of several  
110 promising products, ranging from blood-derivatives (platelet-rich plasma - PRP) to minimally  
111 manipulated mesenchymal stromal cells (MSCs) harvested from bone marrow or adipose tissue.  
112 Although the intra-articular use of these products for the treatment of knee OA provided overall  
113 positive results, the improvement in terms of pain relief and function remains partial and not always  
114 satisfactory.[6] Thus, a new technique has been recently proposed to further exploit the potential of  
115 biologic products by targeting the subchondral bone.[7] This strategy is supported by the substantial  
116 evidence revealing that subchondral bone alterations may play a critical role in both the  
117 pathophysiology and progression of knee OA.[8] However, beside promising early findings and the  
118 increasing use of this approach in the clinical practice, there is only limited and low-level evidence,  
119 and it would be clinically relevant to evaluate with a high-level study design the real benefit  
120 provided by the addition of subchondral injections to improve the results of intra-articular injections  
121 for knee OA.

1  
2  
3 123 *Objectives and trial design*  
4

5 124 A double-blinded randomized controlled trial (RCT) was designed to compare the efficacy of a  
6  
7  
8 125 combination of intra-articular and subchondral injections of bone marrow aspirate concentrate  
9  
10 126 (BMAC) (treatment group) versus BMAC intra-articular injection alone (control group) to treat  
11  
12 127 knee OA, with a 1:1 allocation ratio. The aim of this superiority trial is to evaluate the safety and  
13  
14  
15 128 the clinical potential of this new treatment approach up to one year of follow-up, and to verify the  
16  
17 129 hypothesis that the combination of subchondral and intra-articular injections provides higher knee  
18  
19 130 pain and function improvement compared to BMAC intra-articular injection alone in knee OA.  
20  
21  
22 131

23  
24 132 **METHODS AND ANALYSIS**  
25

26 133 *Study setting*  
27

28 134 The study is a single center double-blind RCT, with all activities related to the study performed in a  
29  
30  
31 135 single site, the IRCCS Rizzoli Orthopaedic Institute, Bologna, Italy.  
32

33 136 This trial protocol is produced according to the SPIRIT (Standard Protocol Items:  
34  
35 137 Recommendations for Interventional Trials) reporting guidelines. [9]  
36  
37  
38 138

39  
40 139 *Patient and public involvement*  
41

42 140 Patients are not involved in planning of research questions, outcome measures or design of the  
43  
44  
45 141 study.  
46  
47 142  
48

49 143 *Eligibility criteria*  
50

51 144 Patients are recruited according to the following criteria.  
52  
53

54 145 Inclusion criteria:

- 55  
56 146 - Male or female patients, aged between 40 and 70;  
57  
58 147 - OA of the medial compartment of the knee (grade II or III according to the Kellgren-  
59  
60 148 Lawrence classification);



- 1  
2  
3 149 - Failure after at least 6 months of conservative treatment (drug therapy with NSAIDs and  
4  
5 150 painkillers, hyaluronic acid infiltration, corticosteroid infiltration, PRP);  
6  
7  
8 151 - Patients' ability and consent to participate in clinical and radiological follow-up;  
9  
10 152 - Signature of informed consent.

11  
12 153 Exclusion criteria:

- 13  
14 154 - Patients with trauma in the 6 months prior to surgery;  
15  
16  
17 155 - Patients with malignancy;  
18  
19 156 - Patients suffering from rheumatic diseases;  
20  
21  
22 157 - Patients suffering from uncompensated diabetes;  
23  
24 158 - Patients suffering from uncompensated thyroid metabolic disorders;  
25  
26 159 - Patients abusing alcoholic beverages or drugs;  
27  
28  
29 160 - Patients with axial deviations  $> 5^\circ$ ;  
30  
31 161 - Body Mass Index  $> 35$ ;  
32  
33 162 - Patients treated with joint injections in the previous 6 months;  
34  
35 163 - Patients treated with surgery at the same knee in the previous 12 months.

36  
37  
38 164

39  
40 165 *Intervention*

41  
42 166 All patients are treated by orthopedic surgeons with established experience in cartilage and  
43  
44 167 osteoarthritis orthobiologic procedures. The procedure is performed in a single step in the operating  
45  
46  
47 168 room with patients in supine position under spinal loco-regional anaesthesia. The ipsilateral hip is  
48  
49 169 sterilely prepared and draped for anterior iliac crest bone marrow aspiration. The anterior superior  
50  
51 170 iliac spine is the anatomical landmark for a small surgical incision. A diamond tip trocar is inserted  
52  
53  
54 171 in this point and then advanced into the bone marrow using a drill. Bone marrow is collected using  
55  
56 172 two 30 ml syringes coated with heparin. The harvested bone marrow is filtered with a heparin  
57  
58 173 washed filter and then centrifuged through the Magellan<sup>®</sup> centrifuge (Arteriocyte Medical Systems,  
59  
60 174 MA, USA) at a rate of 3600 RPM for approximately 15 minutes, thus obtaining 10 ml of BMAC.

1  
2  
3 175 For each patient, BMAC samples that are not used for surgical treatment are sent to the laboratory  
4  
5 176 for the count of mononuclear cells, cell clonogenic ability by colony forming unit-fibroblast test and  
6  
7  
8 177 phenotypical characterization by flow-cytometry evaluation.  
9

10 178 Concomitantly with the bone marrow concentration process, all patients undergo an arthroscopic  
11  
12 179 evaluation to confirm lesions grade and site of both medial femoral condyle and medial tibial  
13  
14  
15 180 plateau. Arthroscopy is done using the standard antero-lateral, antero-medial, and supero-medial  
16  
17 181 portals. If the arthroscopic examination reveals intra-articular problems (excluding minor  
18  
19 182 arthroscopic shaving) requiring surgical intervention which may affect the results of the procedure,  
20  
21  
22 183 the patient is excluded from the study.  
23

24 184 Once the arthroscopy and the BMAC procedure are completed, the injections are performed. The  
25  
26 185 treatment group receives two 2.5 ml subchondral BMAC injections, that are performed inserting  
27  
28 186 two 8-Gauge trocars through the supero-medial and antero-medial arthroscopic portals and are  
29  
30  
31 187 manually introduced with clockwise and anticlockwise movements, under fluoroscopic control, into  
32  
33 188 the bone of both medial femoral condyle and tibial plateau. Following arthroscopic portals suture,  
34  
35 189 both groups of treatment receive a 3ml intra-articular injection of BMAC using a lateral  
36  
37  
38 190 suprapatellar approach. An elastic bandage is made after wounds medication. The whole procedure  
39  
40 191 is presented in Figure 1.  
41

42 192 Postoperatively, patients are discharged on the same day of the procedure or the day after, based on  
43  
44 193 patient condition. Pain control is prescribed as needed with analgesics only in the immediate period  
45  
46  
47 194 after treatment, and thromboembolic prophylaxis is prescribed for two weeks. During the same  
48  
49 195 time, patients are taught to walk with the support of two crutches to allow a partial weight-bearing  
50  
51 196 on the operated limb. Cryotherapy is started within the first 24 hours. Passive mobilisation and  
52  
53  
54 197 quadriceps isometric exercises are started at the second post-operative day. Patients are permitted to  
55  
56 198 return to most of their daily activities as tolerated once they reach full weight-bearing. No other  
57  
58 199 conservative treatments are prescribed during the study period. Joint impacting sport activities are  
59  
60 200 discouraged within the first month after treatment.

1  
2  
3  
4  
5  
6  
7  
8  
9  
10  
11  
12  
13  
14  
15  
16  
17  
18  
19  
20  
21  
22  
23  
24  
25  
26  
27  
28  
29  
30  
31  
32  
33  
34  
35  
36  
37  
38  
39  
40  
41  
42  
43  
44  
45  
46  
47  
48  
49  
50  
51  
52  
53  
54  
55  
56  
57  
58  
59  
60

### 201 *Outcomes*

202 The primary outcome is the Western Ontario and McMaster Universities Osteoarthritis Index  
203 (WOMAC), a 24 items self-administered questionnaire taking into account articular pain and  
204 stiffness and physical function limitations due to knee OA. It ranges from 0 to 96 points and higher  
205 WOMAC scores indicate worse pain, stiffness, and functional limitations.

206 The secondary outcomes include the International Knee Documentation Committee (IKDC)  
207 Subjective and Objective Knee Evaluation Form (a patient-completed tool taking into account knee  
208 symptoms, knee function, and sport activity), the Tegner activity scale (a one-item score based on  
209 work and sports activities), the EuroQol-visual analogue scale (EQ-VAS) that provides an  
210 assessment of patients global health, the health questionnaire EQ-5D score (a 5 level self-assessed,  
211 health related, quality of life questionnaire).

212 Patients will also undergo MRI and CT assessments. MRI scans are obtained with a high-resolution  
213 3 Tesla MRI scanner with PD-weighted Turbo Spin Echo 3D sequences with and without fat  
214 saturation (FS), 3D T2\* Gradient Echo (MERGE) with FS, axial PD-weighted Fast Spin Echo  
215 sequences with FS, and Multi-Echo T2 Mapping on the sagittal plane with 8 different Echo Times.

216 The Whole-Organ Magnetic Resonance Imaging Score (WORMS) will be used to assess seven  
217 features of the treated knees: articular cartilage morphology, bone marrow oedema, subchondral  
218 cysts, articular profile, marginal osteophytes, meniscal integrity, and synovitis.

219 Articular cartilage morphology will be examined with the 3D MERGE and the T2 Mapping; bone  
220 marrow oedema and synovitis with the PD fat sat sequences, the articular profiles with the PD and  
221 MERGE sequences, and the meniscal integrity with the DP sequences.

222 CT knee scans are obtained with a 64-channels CT scanner to better assess the structural resolution  
223 of bone trabeculae as well as to assess the presence of osteophytes, calcifications, and cancellous  
224 bone microcysts. The images were acquired using a slice thickness of 1.25 mm and an interval of  
225 0.625 mm at 120kV with 250 mA, post-processed with the “Bone” filter, and reformatted in the  
226 coronal and sagittal plane.

1  
2  
3 227 Blood samples are obtained from participants before treatment and at 2, 6, and 12 months of follow-  
4  
5 228 up. Samples are analysed for inflammatory (IL-1 $\beta$ , TNF $\alpha$ ) and OA progression markers (Cleavage  
6  
7 229 of Type II Collagen, Serum C-telopeptide fragments of type II collagen).  
8  
9

10 230

### 11 12 231 *Participant timeline*

13  
14 232 Research assistants first conduct a screening of potential candidates over the telephone. If early  
15  
16 233 checks of study eligibility are favourable, participants are booked in for a face-to-face screening  
17  
18 234 visit with an orthopaedic specialist to confirm eligibility and explain the study protocol. After the  
19  
20 235 screening visit, patients complete the questionnaires, undergo a knee MRI and CT, and sign the  
21  
22 236 informed written consent. Patient enrolment started on November 2019. The first patient was  
23  
24 237 treated in December 2019. Follow-up assessments is performed at 2, 6, and 12 months  
25  
26 238 postoperatively with patient questionnaires and blood samples. At the final 12-month follow-up  
27  
28 239 patients undergo knee MRI and CT scans. Due to operational delays caused by the COVID-19  
29  
30 240 pandemic, patient treatment is still ongoing; the study conclusion is foreseen before the end of  
31  
32 241 2023. Participant timeline is outlined in Table 1.  
33  
34  
35  
36  
37  
38

39 242 **Table 1.** The study procedures schedule.

|                       | Before treatment | Treatment | 2-month follow-up | 6-month follow-up | 12-month follow-up |
|-----------------------|------------------|-----------|-------------------|-------------------|--------------------|
| Patient eligibility   | X                |           |                   |                   |                    |
| Informed consent      | X                |           |                   |                   |                    |
| WOMAC                 | X                |           | X                 | X                 | X                  |
| IKDC score            | X                |           | X                 | X                 | X                  |
| Tegner activity score | X                |           | X                 | X                 | X                  |
| EQ-5D and EQ-VAS      | X                |           | X                 | X                 | X                  |
| Blood sample          |                  | X         | X                 | X                 | X                  |
| BMAC sample           |                  | X         |                   |                   |                    |
| MRI                   | X                |           |                   |                   | X                  |
| CT                    | X                |           |                   |                   | X                  |
| AE reporting          |                  | X         | X                 | X                 | X                  |

58 243 AE: Adverse Event; BMAC: Bone Marrow Aspirate Concentrate; CT: Computed tomography; EQ-5D: European  
59 244 Quality of Life Five Dimension; EQ-VAS: European Quality - Visual Analog Scale; IKDC: International Knee  
60 245 Documentation Committee; MRI: magnetic resonance imaging; WOMAC: Western Ontario and McMaster Universities  
246 Osteoarthritis Index

1  
2  
3  
4  
5  
6  
7  
8  
9  
10  
11  
12  
13  
14  
15  
16  
17  
18  
19  
20  
21  
22  
23  
24  
25  
26  
27  
28  
29  
30  
31  
32  
33  
34  
35  
36  
37  
38  
39  
40  
41  
42  
43  
44  
45  
46  
47  
48  
49  
50  
51  
52  
53  
54  
55  
56  
57  
58  
59  
60

### 247 *Recruitment*

248 Patients undergo an outpatient visit conducted by properly trained medical staff belonging to the  
249 team of orthopaedic surgeons of the Rizzoli Orthopaedic Institute, which assess patients' eligibility  
250 and take care of patient education.

251

### 252 *Blinding*

253 This is a double-blind RCT with both participants and physicians assessing outcomes being blinded  
254 to treatment allocation. Only after the evaluation at the 12-month follow-up the blinding is opened  
255 and it is revealed to the patient which one of the two treatments was administered.

256 The blindness of treated patients is further guaranteed by the same number of surgical access and by  
257 the same length of the surgical incision for both treatments. Early unblinding occurs in case of  
258 premature patients drop-out.

259

### 260 *Allocation*

261 A total of 86 eligible patients are allocated to receive either a combination of intra articular and  
262 subchondral BMAC injection or BMAC intra articular injection alone, in a 1:1 ratio (43 patients for  
263 each group of treatment) based on a computer-generated random numbers randomisation. This is  
264 conducted by research staff members dedicated to study organization and monitoring with no direct  
265 involvement in the study procedures. The randomization list is covered by password and accessible  
266 only by staff members with no direct involvement in the study.

267

### 268 *Adverse events and assessment process*

269 Adverse events are monitored throughout the study, intraoperatively and at clinical follow-up  
270 evaluations. Standard safety and efficacy monitoring is performed through regular face-to-face  
271 visits and phone calls between visits. The patients are also requested to report any adverse events to  
272 the research staff spontaneously. Every adverse event is recorded in the patient Case Report Form

1  
2  
3 273 (CRF). Severe adverse events are considered those resulting in death or being life-threatening,  
4  
5 274 requiring hospitalization or intervention to prevent permanent impairment or damage; they are  
6  
7  
8 275 reported in accordance with the requirements of the Ethical Committee. Use of pain medicines is  
9  
10 276 recorded at all visits.

11  
12 277 To ensure high-quality execution of the trial in accordance with the protocol, all trial staff is trained  
13  
14 278 by the chief investigators and provided with a standard protocol book which contains details of  
15  
16  
17 279 standard operating procedures, trial contacts, visits, measurements, monitoring, and case report  
18  
19 280 forms.

20  
21  
22 281

#### 23 24 282 *Data collection methods*

25  
26 283 Data are firstly collected on paper-based case report forms, with the help of research trained  
27  
28 284 orthopaedic residents blinded to treatment allocation, and subsequently trained data analysts process  
29  
30  
31 285 data into electronic form for statistical analysis. Baseline and final MRI and CT knee scans are  
32  
33 286 coded and stored at the Rizzoli Orthopaedic Institute to ensure data quality control. Operative data  
34  
35 287 are collected electronically by the respective surgeons shortly after surgery.

36  
37  
38 288

#### 39 40 289 *Data management*

41  
42 290 Study data are stored in a password-protected spreadsheet on a server that is hosted at the Rizzoli  
43  
44 291 Orthopaedical Institute. Data transfer is encrypted with all data de-identified. Only trained research  
45  
46  
47 292 personnel specifically dedicated to the data handling can access the database and ensures the  
48  
49 293 correspondence of the electronic data with the original paper-based questionnaires and medical  
50  
51 294 charts.

52  
53  
54 295

#### 55 56 296 *Statistical methods*

57  
58 297 We conducted a power analysis (G\*Power 3.1.9.2) and using assumptions of 80% of power and 5%  
59  
60 298 of probability of type 1 error ( $\alpha = 0.05$ ), we will need 76 participants. Adjusting for a 10% loss

1  
2  
3 299 to follow-up, we will need 86 participants (43 in each arm). With 76 subjects we will have a 80%  
4  
5 300 power to detect a difference between the two groups in terms of WOMAC score at one year follow-  
6  
7  
8 301 up with a moderate size-effect (0.55) determined with the Cohen convention (effects: small  $\geq .20$ ,  
9  
10 302 medium  $\geq .50$ , large  $\geq .80$ ). The primary analyses will be intention-to-treat analyses of primary and  
11  
12 303 secondary outcomes. Per protocol analyses will be performed as the secondary analyses. All those  
13  
14 304 who have started the treatment are considered part of the research, regardless of whether they will  
15  
16  
17 305 complete it.

18  
19 306 Continuous variables will be expressed as means and standard deviations if normally distributed,  
20  
21 307 as medians and range if not. Categorical variables will be expressed as frequencies and  
22  
23  
24 308 percentage. Normality of the distribution will be assessed using the Shapiro Wilks test. The Levene  
25  
26 309 test will be used to assess the homoscedasticity of the data. The Repeated Measures ANOVA,  
27  
28 310 followed by the post hoc Sidak pairwise test will be performed to compare the scores at different  
29  
30  
31 311 follow-up times. The OneWay ANOVA test will be performed to assess the between group  
32  
33 312 differences of continuous and normally distributed and homoscedastic data; the Mann Whitney test  
34  
35 313 will be used otherwise. The ANOVA test followed by the Scheffè post hoc pairwise comparison  
36  
37  
38 314 will be used also to assess the among groups differences of continuous, normally distributed and  
39  
40 315 homoscedastic data, the Kruskal Wallis test followed by the Mann Whitney test with the Bonferroni  
41  
42 316 correction for multiple comparison will be used otherwise. The Monte Carlo method will be used to  
43  
44  
45 317 evaluate the non-parametric tests in case of small size of the sub-groups. Pearson chi square exact  
46  
47 318 test will be performed to investigate relationships between grouping variables. The Spearman rank  
48  
49 319 Correlation will be used to assess correlations between the numerical scores and continuous data.  
50  
51 320 The General linear model or the Generalized linear model in case of not normal distribution, will be  
52  
53  
54 321 used as multivariate analysis to compare the group's outcomes corrected by the influencing factors.  
55  
56 322 The Kaplan Meyer analysis will be performed to assess survival to major adverse events. For all  
57  
58 323 tests  $p < 0.05$  will be considered significant. SPSS version 19.0 (IBM Corp., Armonk, NY, USA)  
59  
60 324 will be applied for the analyses.



1  
2  
3 325 *Data monitoring*  
4

5 326 A central project data manager is tasked to perform data quality control on all collected data. An  
6  
7  
8 327 interim report and a final report are foreseen, to be submitted to the Ministry of Health who funded  
9  
10 328 the project. The monitoring personnel belongs to a research structure of the Scientific Direction of  
11  
12 329 the Institution, the Applied and Translational Research Center, and it is independent from the Clinic  
13  
14  
15 330 and the medical personnel performing the study procedures. A further project auditing is performed  
16  
17 331 by another independent entity of the Institution, the Clinical Trial Center. The final study report is  
18  
19 332 also sent to the Ethic Committee.  
20

21  
22 333

23  
24 334 **ETHICS AND DISSEMINATION**  
25

26 335  
27  
28 336 *Research ethics approval*  
29

30 337 Ethical approval was obtained on 5 May 2018 from the central Emilia Wide Area Ethical  
31  
32  
33 338 Committee of the Emilia-Romagna Region (CE-AVEC) settled at the University General Hospital  
34  
35 339 Sant'Orsola-Malpighi of Bologna.  
36

37 340

38  
39  
40 341 *Protocol amendments*  
41

42 342 Minor protocol amendments, for example, database production changes to facilitate monitoring  
43  
44 343 processes or improve outcome assessment by questionnaire, are fully documented. In case of major  
45  
46  
47 344 amendments, for example, changes to the patient information sheet and consent form, change of a  
48  
49 345 local project leader or the inclusion of a new project site, they will be submitted for approval by the  
50  
51 346 lead Ethics Committee as required.  
52

53 347

54  
55  
56 348 *Consent or assent*  
57

58 349 All participants will provide informed written consent in Italian and they may dropout the trial at  
59  
60 350 any time during the study course.



1  
2  
3 351 *Confidentiality*

4  
5 352 Data are recorded using case report forms and processed centrally at the Rizzoli Orthopedics  
6  
7  
8 353 Institute, Bologna, Italy. The hard copies of case report forms are stored in a locked area with  
9  
10 354 secured and restricted access. The electronic data are stored on password protected servers with  
11  
12 355 restricted access. All data collected are kept strictly confidential. Daily backups of all electronic  
13  
14 356 data occur to minimize any risk of lost data. After study completion, paper copies of data are  
15  
16  
17 357 archived in secure storage. Identifiers are be removed in case follow-up of study patients is  
18  
19 358 necessary; however, electronic data continue to be kept in a secure electronic database. This  
20  
21  
22 359 remains password protected and with access given only to the study investigators unless otherwise  
23  
24 360 authorized by the study team.

25  
26 361  
27  
28 362 *Access to data*

29  
30 363 Only members of the research team who need to contact study patients, enter data, or perform data  
31  
32  
33 364 quality control have access to patient information.

34  
35 365  
36  
37 366 *Dissemination policy*

38  
39  
40 367 This trial is produced according to the SPIRIT (Standard Protocol Items: Recommendations for  
41  
42 368 Interventional Trials) international standards. Results will be disseminated through peer-reviewed  
43  
44  
45 369 publications and will be submitted for presentation at national and international conferences. The  
46  
47 370 authorship will be based on International Committee of Medical Journal Editors 2018  
48  
49 371 Recommendations.

50  
51 372  
52  
53 373 *Scientific relevance and broader impact*

54  
55  
56 374 This study provides a detailed method of treatment for knee OA and can offer clear indications on  
57  
58 375 the potential and limitations of the combined use of intra-articular and subchondral bone injections  
59  
60 376 of BMAC. The BMAC analysis provides characterisation of this product to shed greater light on the

1  
2  
3 377 properties ensuring its effectiveness. Baseline patient-related and disease-related factors analysis  
4  
5 378 can allow to better define those characteristics that make different subjects more or less responsive  
6  
7  
8 379 to this type of treatment.  
9

10 380  
11  
12 381 *Contributorship statement*

13  
14 382 ADM is the principal investigator of this study. SS, LA, AB, DR wrote the manuscript and will  
15  
16  
17 383 conduct the trial. GV and MM are responsible of imaging evaluation. CC and BG are involved in  
18  
19 384 products and patients' characterization. ADM, SZ and GF applied for funding and supervise the  
20  
21 385 trial. All authors read and approved the final protocol.  
22  
23

24 386  
25  
26 387 *Competing interest*

27  
28 388 SZ reports non-financial support from personal fees from I+SRL, grants from FidiaFarmaceutici  
29  
30 389 S.p.A., Cartiheal Ltd, IGEA clinical biophysics, BIOMET, and Kensey Nash, outside the submitted  
31  
32  
33 390 work. The funders had no role in the design of the study, in the collection, analyses, or  
34  
35 391 interpretation of data, in the writing of the manuscript, or in the decision to publish the results. The  
36  
37 392 principal investigator and other authors declare no financial and other competing interests.  
38  
39

40 393  
41  
42 394 *Funding:* The study is funded by Italian Health Ministry in the Project "Giovane Ricercatore" (GR-  
43  
44 395 2016-02361990).  
45  
46

47 396  
48  
49 397 *Data sharing statement*

50  
51 398 No data are available  
52  
53  
54 399  
55  
56 400  
57  
58 401  
59  
60 402

1  
2  
3  
4  
5  
6  
7  
8  
9  
10  
11  
12  
13  
14  
15  
16  
17  
18  
19  
20  
21  
22  
23  
24  
25  
26  
27  
28  
29  
30  
31  
32  
33  
34  
35  
36  
37  
38  
39  
40  
41  
42  
43  
44  
45  
46  
47  
48  
49  
50  
51  
52  
53  
54  
55  
56  
57  
58  
59  
60**REFERENCES**

1. Mobasher A, Batt M. An update on the pathophysiology of osteoarthritis. *Ann Phys Rehabil Med*. 2016 Dec;59(5-6):333-339.
2. Donell S. Subchondral bone remodelling in osteoarthritis. *EFORT Open Rev*. 2019 Jun 3;4(6):221-229.
3. Bitton R. The economic burden of osteoarthritis. *Am J Manag Care*. 2009 Sep;15(8 Suppl):S230-5.
4. Delanois RE, Mistry JB, Gwam CU, et al. Current Epidemiology of Revision Total Knee Arthroplasty in the United States. *J Arthroplasty*. 2017 Sep;32(9):2663-2668.
5. Filardo G, Kon E, Longo UG, et al. Non-surgical treatments for the management of early osteoarthritis. *Knee Surg Sports Traumatol Arthrosc*. 2016 Jun;24(6):1775-85.
6. Cavallo C, Boffa A, Andriolo L, et al. Bone marrow concentrate injections for the treatment of osteoarthritis: evidence from preclinical findings to the clinical application. *Int Orthop*. 2021 Feb;45(2):525-538.
7. Hernigou P, Auregan JC, Dubory A, et al. Subchondral stem cell therapy versus contralateral total knee arthroplasty for osteoarthritis following secondary osteonecrosis of the knee. *Int Orthop*. 2018 Nov;42(11):2563-2571.
8. Singh V, Oliashirazi A, Tan T, et al. Clinical and Pathophysiologic Significance of MRI Identified Bone Marrow Lesions Associated with Knee Osteoarthritis. *Arch Bone Jt Surg*. 2019 May;7(3):211-219.
9. Chan AW, Tetzlaff JM, Gøtzsche PC, et al. SPIRIT 2013 explanation and elaboration: guidance for protocols of clinical trials. *BMJ*. 2013 346:e7586

1  
2  
3 429 **FIGURE LEGEND**  
4

5 430 Figure 1 - Anterior iliac crest trocar insertion (A); Bone Marrow (BM) harvesting (B); BM filtration  
6  
7  
8 431 (C); BM concentration (D); Trocar positioning under fluoroscopic control (E); Intra-articular and  
9  
10 432 subchondral Bone Marrow Aspirate Concentrate injections (F).  
11  
12  
13  
14  
15  
16  
17  
18  
19  
20  
21  
22  
23  
24  
25  
26  
27  
28  
29  
30  
31  
32  
33  
34  
35  
36  
37  
38  
39  
40  
41  
42  
43  
44  
45  
46  
47  
48  
49  
50  
51  
52  
53  
54  
55  
56  
57  
58  
59  
60

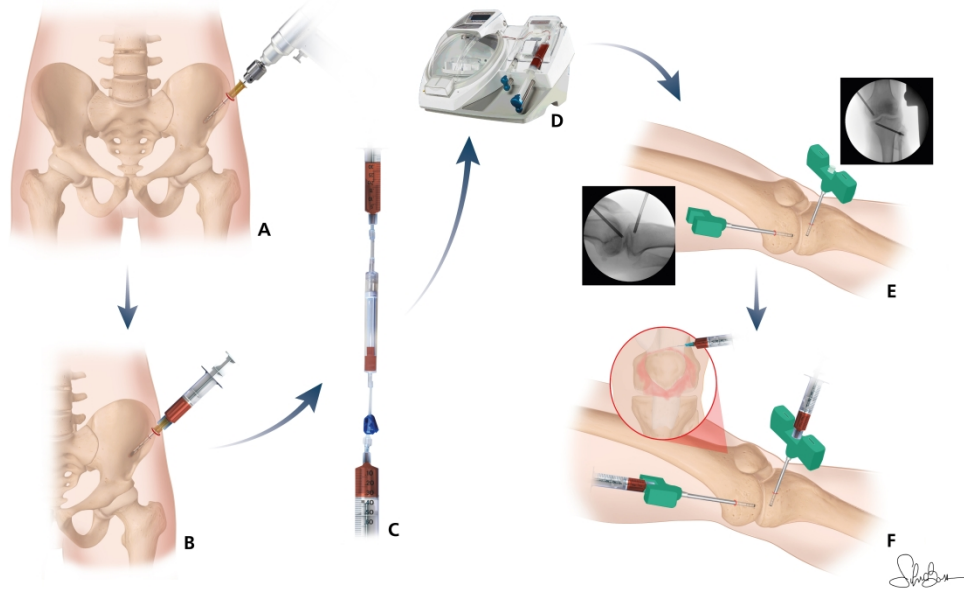

Figure 1: Anterior iliac crest trocar insertion (A); Bone Marrow (BM) harvesting (B); BM filtration (C); BM concentration (D); Trocar positioning under fluoroscopic control (E); Intra-articular and subchondral Bone Marrow Aspirate Concentrate injections (F).

422x279mm (300 x 300 DPI)

# Reporting checklist for protocol of a clinical trial.

Based on the SPIRIT guidelines.

## Instructions to authors

Complete this checklist by entering the page numbers from your manuscript where readers will find each of the items listed below.

Your article may not currently address all the items on the checklist. Please modify your text to include the missing information. If you are certain that an item does not apply, please write "n/a" and provide a short explanation.

Upload your completed checklist as an extra file when you submit to a journal.

In your methods section, say that you used the SPIRIT reporting guidelines, and cite them as:

Chan A-W, Tetzlaff JM, Gøtzsche PC, Altman DG, Mann H, Berlin J, Dickersin K, Hróbjartsson A, Schulz KF, Parulekar WR, Krleža-Jerić K, Laupacis A, Moher D. SPIRIT 2013 Explanation and Elaboration: Guidance for protocols of clinical trials. *BMJ*. 2013;346:e7586

|                                   |                     |                                                                                                              | Page   |
|-----------------------------------|---------------------|--------------------------------------------------------------------------------------------------------------|--------|
|                                   |                     | Reporting Item                                                                                               | Number |
| <b>Administrative information</b> |                     |                                                                                                              |        |
| Title                             | <a href="#">#1</a>  | Descriptive title identifying the study design, population, interventions, and, if applicable, trial acronym | 1      |
| Trial registration                | <a href="#">#2a</a> | Trial identifier and registry name. If not yet registered,                                                   | 1      |

|    |                          |                                                                                  |   |
|----|--------------------------|----------------------------------------------------------------------------------|---|
| 1  |                          | name of intended registry                                                        |   |
| 2  |                          |                                                                                  |   |
| 3  |                          |                                                                                  |   |
| 4  | Trial registration: data | <a href="#">#2b</a> All items from the World Health Organization Trial           | 1 |
| 5  |                          |                                                                                  |   |
| 6  | set                      | Registration Data Set                                                            |   |
| 7  |                          |                                                                                  |   |
| 8  |                          |                                                                                  |   |
| 9  | Protocol version         | <a href="#">#3</a> Date and version identifier                                   | 1 |
| 10 |                          |                                                                                  |   |
| 11 |                          |                                                                                  |   |
| 12 | Funding                  | <a href="#">#4</a> Sources and types of financial, material, and other support   | 1 |
| 13 |                          |                                                                                  |   |
| 14 |                          |                                                                                  |   |
| 15 | Roles and                | <a href="#">#5a</a> Names, affiliations, and roles of protocol contributors      | 2 |
| 16 |                          |                                                                                  |   |
| 17 | responsibilities:        |                                                                                  |   |
| 18 |                          |                                                                                  |   |
| 19 | contributorship          |                                                                                  |   |
| 20 |                          |                                                                                  |   |
| 21 |                          |                                                                                  |   |
| 22 |                          |                                                                                  |   |
| 23 | Roles and                | <a href="#">#5b</a> Name and contact information for the trial sponsor           | 1 |
| 24 |                          |                                                                                  |   |
| 25 | responsibilities:        |                                                                                  |   |
| 26 |                          |                                                                                  |   |
| 27 | sponsor contact          |                                                                                  |   |
| 28 |                          |                                                                                  |   |
| 29 | information              |                                                                                  |   |
| 30 |                          |                                                                                  |   |
| 31 |                          |                                                                                  |   |
| 32 |                          |                                                                                  |   |
| 33 | Roles and                | <a href="#">#5c</a> Role of study sponsor and funders, if any, in study design;  | 1 |
| 34 |                          |                                                                                  |   |
| 35 | responsibilities:        | collection, management, analysis, and interpretation of                          |   |
| 36 |                          |                                                                                  |   |
| 37 | sponsor and funder       | data; writing of the report; and the decision to submit the                      |   |
| 38 |                          |                                                                                  |   |
| 39 |                          | report for publication, including whether they will have                         |   |
| 40 |                          |                                                                                  |   |
| 41 |                          | ultimate authority over any of these activities                                  |   |
| 42 |                          |                                                                                  |   |
| 43 |                          |                                                                                  |   |
| 44 |                          |                                                                                  |   |
| 45 | Roles and                | <a href="#">#5d</a> Composition, roles, and responsibilities of the coordinating | 1 |
| 46 |                          |                                                                                  |   |
| 47 | responsibilities:        | centre, steering committee, endpoint adjudication                                |   |
| 48 |                          |                                                                                  |   |
| 49 | committees               | committee, data management team, and other individuals                           |   |
| 50 |                          |                                                                                  |   |
| 51 |                          | or groups overseeing the trial, if applicable (see Item 21a                      |   |
| 52 |                          |                                                                                  |   |
| 53 |                          | for data monitoring committee)                                                   |   |
| 54 |                          |                                                                                  |   |
| 55 |                          |                                                                                  |   |
| 56 |                          |                                                                                  |   |
| 57 | <b>Introduction</b>      |                                                                                  |   |
| 58 |                          |                                                                                  |   |
| 59 |                          |                                                                                  |   |
| 60 |                          |                                                                                  |   |

|    |                           |                     |                                                                   |   |
|----|---------------------------|---------------------|-------------------------------------------------------------------|---|
| 1  | Background and            | <a href="#">#6a</a> | Description of research question and justification for            | 3 |
| 2  |                           |                     |                                                                   |   |
| 3  | rationale                 |                     | undertaking the trial, including summary of relevant studies      |   |
| 4  |                           |                     | (published and unpublished) examining benefits and harms          |   |
| 5  |                           |                     | for each intervention                                             |   |
| 6  |                           |                     |                                                                   |   |
| 7  |                           |                     |                                                                   |   |
| 8  |                           |                     |                                                                   |   |
| 9  |                           |                     |                                                                   |   |
| 10 |                           |                     |                                                                   |   |
| 11 | Background and            | <a href="#">#6b</a> | Explanation for choice of comparators                             | 3 |
| 12 |                           |                     |                                                                   |   |
| 13 | rationale: choice of      |                     |                                                                   |   |
| 14 |                           |                     |                                                                   |   |
| 15 | comparators               |                     |                                                                   |   |
| 16 |                           |                     |                                                                   |   |
| 17 |                           |                     |                                                                   |   |
| 18 | Objectives                | <a href="#">#7</a>  | Specific objectives or hypotheses                                 | 4 |
| 19 |                           |                     |                                                                   |   |
| 20 |                           |                     |                                                                   |   |
| 21 |                           |                     |                                                                   |   |
| 22 | Trial design              | <a href="#">#8</a>  | Description of trial design including type of trial (eg, parallel | 4 |
| 23 |                           |                     | group, crossover, factorial, single group), allocation ratio,     |   |
| 24 |                           |                     | and framework (eg, superiority, equivalence, non-inferiority,     |   |
| 25 |                           |                     | exploratory)                                                      |   |
| 26 |                           |                     |                                                                   |   |
| 27 |                           |                     |                                                                   |   |
| 28 |                           |                     |                                                                   |   |
| 29 |                           |                     |                                                                   |   |
| 30 |                           |                     |                                                                   |   |
| 31 | <b>Methods:</b>           |                     |                                                                   |   |
| 32 |                           |                     |                                                                   |   |
| 33 | <b>Participants,</b>      |                     |                                                                   |   |
| 34 |                           |                     |                                                                   |   |
| 35 | <b>interventions, and</b> |                     |                                                                   |   |
| 36 |                           |                     |                                                                   |   |
| 37 | <b>outcomes</b>           |                     |                                                                   |   |
| 38 |                           |                     |                                                                   |   |
| 39 |                           |                     |                                                                   |   |
| 40 |                           |                     |                                                                   |   |
| 41 | Study setting             | <a href="#">#9</a>  | Description of study settings (eg, community clinic,              | 4 |
| 42 |                           |                     | academic hospital) and list of countries where data will be       |   |
| 43 |                           |                     | collected. Reference to where list of study sites can be          |   |
| 44 |                           |                     | obtained                                                          |   |
| 45 |                           |                     |                                                                   |   |
| 46 |                           |                     |                                                                   |   |
| 47 |                           |                     |                                                                   |   |
| 48 |                           |                     |                                                                   |   |
| 49 |                           |                     |                                                                   |   |
| 50 |                           |                     |                                                                   |   |
| 51 | Eligibility criteria      | <a href="#">#10</a> | Inclusion and exclusion criteria for participants. If             | 4 |
| 52 |                           |                     | applicable, eligibility criteria for study centres and            |   |
| 53 |                           |                     | individuals who will perform the interventions (eg,               |   |
| 54 |                           |                     |                                                                   |   |
| 55 |                           |                     |                                                                   |   |
| 56 |                           |                     |                                                                   |   |
| 57 |                           |                     |                                                                   |   |
| 58 |                           |                     |                                                                   |   |
| 59 |                           |                     |                                                                   |   |
| 60 |                           |                     |                                                                   |   |



|    |                      |                                                                                   |   |
|----|----------------------|-----------------------------------------------------------------------------------|---|
| 1  |                      | surgeons, psychotherapists)                                                       |   |
| 2  |                      |                                                                                   |   |
| 3  |                      |                                                                                   |   |
| 4  | Interventions:       | <a href="#">#11a</a> Interventions for each group with sufficient detail to allow | 5 |
| 5  |                      |                                                                                   |   |
| 6  | description          | replication, including how and when they will be                                  |   |
| 7  |                      |                                                                                   |   |
| 8  |                      | administered                                                                      |   |
| 9  |                      |                                                                                   |   |
| 10 |                      |                                                                                   |   |
| 11 | Interventions:       | <a href="#">#11b</a> Criteria for discontinuing or modifying allocated            | 6 |
| 12 |                      |                                                                                   |   |
| 13 | modifications        | interventions for a given trial participant (eg, drug dose                        |   |
| 14 |                      |                                                                                   |   |
| 15 |                      | change in response to harms, participant request, or                              |   |
| 16 |                      |                                                                                   |   |
| 17 |                      | improving / worsening disease)                                                    |   |
| 18 |                      |                                                                                   |   |
| 19 |                      |                                                                                   |   |
| 20 |                      |                                                                                   |   |
| 21 | Interventions:       | <a href="#">#11c</a> Strategies to improve adherence to intervention protocols,   | 9 |
| 22 |                      |                                                                                   |   |
| 23 | adherence            | and any procedures for monitoring adherence (eg, drug                             |   |
| 24 |                      |                                                                                   |   |
| 25 |                      | tablet return; laboratory tests)                                                  |   |
| 26 |                      |                                                                                   |   |
| 27 |                      |                                                                                   |   |
| 28 |                      |                                                                                   |   |
| 29 | Interventions:       | <a href="#">#11d</a> Relevant concomitant care and interventions that are         | 6 |
| 30 |                      |                                                                                   |   |
| 31 | concomitant care     | permitted or prohibited during the trial                                          |   |
| 32 |                      |                                                                                   |   |
| 33 |                      |                                                                                   |   |
| 34 | Outcomes             | <a href="#">#12</a> Primary, secondary, and other outcomes, including the         | 7 |
| 35 |                      |                                                                                   |   |
| 36 |                      | specific measurement variable (eg, systolic blood                                 |   |
| 37 |                      |                                                                                   |   |
| 38 |                      | pressure), analysis metric (eg, change from baseline, final                       |   |
| 39 |                      |                                                                                   |   |
| 40 |                      | value, time to event), method of aggregation (eg, median,                         |   |
| 41 |                      |                                                                                   |   |
| 42 |                      | proportion), and time point for each outcome. Explanation                         |   |
| 43 |                      |                                                                                   |   |
| 44 |                      | of the clinical relevance of chosen efficacy and harm                             |   |
| 45 |                      |                                                                                   |   |
| 46 |                      | outcomes is strongly recommended                                                  |   |
| 47 |                      |                                                                                   |   |
| 48 |                      |                                                                                   |   |
| 49 |                      |                                                                                   |   |
| 50 |                      |                                                                                   |   |
| 51 | Participant timeline | <a href="#">#13</a> Time schedule of enrolment, interventions (including any      | 7 |
| 52 |                      |                                                                                   |   |
| 53 |                      | run-ins and washouts), assessments, and visits for                                |   |
| 54 |                      |                                                                                   |   |
| 55 |                      | participants. A schematic diagram is highly recommended                           |   |
| 56 |                      |                                                                                   |   |
| 57 |                      | (see Figure)                                                                      |   |
| 58 |                      |                                                                                   |   |
| 59 |                      |                                                                                   |   |
| 60 |                      |                                                                                   |   |

|    |                              |                      |                                                              |    |
|----|------------------------------|----------------------|--------------------------------------------------------------|----|
| 1  | Sample size                  | <a href="#">#14</a>  | Estimated number of participants needed to achieve study     | 10 |
| 2  |                              |                      | objectives and how it was determined, including clinical and |    |
| 3  |                              |                      | statistical assumptions supporting any sample size           |    |
| 4  |                              |                      | calculations                                                 |    |
| 5  |                              |                      |                                                              |    |
| 6  |                              |                      |                                                              |    |
| 7  |                              |                      |                                                              |    |
| 8  |                              |                      |                                                              |    |
| 9  |                              |                      |                                                              |    |
| 10 |                              |                      |                                                              |    |
| 11 | Recruitment                  | <a href="#">#15</a>  | Strategies for achieving adequate participant enrolment to   | 9  |
| 12 |                              |                      | reach target sample size                                     |    |
| 13 |                              |                      |                                                              |    |
| 14 |                              |                      |                                                              |    |
| 15 |                              |                      |                                                              |    |
| 16 | <b>Methods: Assignment</b>   |                      |                                                              |    |
| 17 | <b>of interventions (for</b> |                      |                                                              |    |
| 18 | <b>controlled trials)</b>    |                      |                                                              |    |
| 19 |                              |                      |                                                              |    |
| 20 |                              |                      |                                                              |    |
| 21 |                              |                      |                                                              |    |
| 22 |                              |                      |                                                              |    |
| 23 |                              |                      |                                                              |    |
| 24 | Allocation: sequence         | <a href="#">#16a</a> | Method of generating the allocation sequence (eg,            | 9  |
| 25 | generation                   |                      | computer-generated random numbers), and list of any          |    |
| 26 |                              |                      | factors for stratification. To reduce predictability of a    |    |
| 27 |                              |                      | random sequence, details of any planned restriction (eg,     |    |
| 28 |                              |                      | blocking) should be provided in a separate document that is  |    |
| 29 |                              |                      | unavailable to those who enrol participants or assign        |    |
| 30 |                              |                      | interventions                                                |    |
| 31 |                              |                      |                                                              |    |
| 32 |                              |                      |                                                              |    |
| 33 |                              |                      |                                                              |    |
| 34 |                              |                      |                                                              |    |
| 35 |                              |                      |                                                              |    |
| 36 |                              |                      |                                                              |    |
| 37 |                              |                      |                                                              |    |
| 38 |                              |                      |                                                              |    |
| 39 |                              |                      |                                                              |    |
| 40 |                              |                      |                                                              |    |
| 41 | Allocation                   | <a href="#">#16b</a> | Mechanism of implementing the allocation sequence (eg,       | 9  |
| 42 | concealment                  |                      | central telephone; sequentially numbered, opaque, sealed     |    |
| 43 | mechanism                    |                      | envelopes), describing any steps to conceal the sequence     |    |
| 44 |                              |                      | until interventions are assigned                             |    |
| 45 |                              |                      |                                                              |    |
| 46 |                              |                      |                                                              |    |
| 47 |                              |                      |                                                              |    |
| 48 |                              |                      |                                                              |    |
| 49 |                              |                      |                                                              |    |
| 50 |                              |                      |                                                              |    |
| 51 | Allocation:                  | <a href="#">#16c</a> | Who will generate the allocation sequence, who will enrol    | 9  |
| 52 | implementation               |                      | participants, and who will assign participants to            |    |
| 53 |                              |                      | interventions                                                |    |
| 54 |                              |                      |                                                              |    |
| 55 |                              |                      |                                                              |    |
| 56 |                              |                      |                                                              |    |
| 57 |                              |                      |                                                              |    |
| 58 |                              |                      |                                                              |    |
| 59 |                              |                      |                                                              |    |
| 60 |                              |                      |                                                              |    |

|    |                        |                      |                                                                |    |
|----|------------------------|----------------------|----------------------------------------------------------------|----|
| 1  | Blinding (masking)     | <a href="#">#17a</a> | Who will be blinded after assignment to interventions (eg,     | 9  |
| 2  |                        |                      | trial participants, care providers, outcome assessors, data    |    |
| 3  |                        |                      | analysts), and how                                             |    |
| 4  |                        |                      |                                                                |    |
| 5  |                        |                      |                                                                |    |
| 6  |                        |                      |                                                                |    |
| 7  |                        |                      |                                                                |    |
| 8  | Blinding (masking):    | <a href="#">#17b</a> | If blinded, circumstances under which unblinding is            | 9  |
| 9  | emergency              |                      | permissible, and procedure for revealing a participant's       |    |
| 10 |                        |                      | allocated intervention during the trial                        |    |
| 11 | unblinding             |                      |                                                                |    |
| 12 |                        |                      |                                                                |    |
| 13 |                        |                      |                                                                |    |
| 14 |                        |                      |                                                                |    |
| 15 |                        |                      |                                                                |    |
| 16 | <b>Methods: Data</b>   |                      |                                                                |    |
| 17 | <b>collection,</b>     |                      |                                                                |    |
| 18 | <b>management, and</b> |                      |                                                                |    |
| 19 | <b>analysis</b>        |                      |                                                                |    |
| 20 |                        |                      |                                                                |    |
| 21 |                        |                      |                                                                |    |
| 22 |                        |                      |                                                                |    |
| 23 |                        |                      |                                                                |    |
| 24 |                        |                      |                                                                |    |
| 25 |                        |                      |                                                                |    |
| 26 | Data collection plan   | <a href="#">#18a</a> | Plans for assessment and collection of outcome, baseline,      | 10 |
| 27 |                        |                      | and other trial data, including any related processes to       |    |
| 28 |                        |                      | promote data quality (eg, duplicate measurements, training     |    |
| 29 |                        |                      | of assessors) and a description of study instruments (eg,      |    |
| 30 |                        |                      | questionnaires, laboratory tests) along with their reliability |    |
| 31 |                        |                      | and validity, if known. Reference to where data collection     |    |
| 32 |                        |                      | forms can be found, if not in the protocol                     |    |
| 33 |                        |                      |                                                                |    |
| 34 |                        |                      |                                                                |    |
| 35 |                        |                      |                                                                |    |
| 36 |                        |                      |                                                                |    |
| 37 |                        |                      |                                                                |    |
| 38 |                        |                      |                                                                |    |
| 39 |                        |                      |                                                                |    |
| 40 |                        |                      |                                                                |    |
| 41 |                        |                      |                                                                |    |
| 42 |                        |                      |                                                                |    |
| 43 | Data collection plan:  | <a href="#">#18b</a> | Plans to promote participant retention and complete follow-    | 9  |
| 44 | retention              |                      | up, including list of any outcome data to be collected for     |    |
| 45 |                        |                      | participants who discontinue or deviate from intervention      |    |
| 46 |                        |                      | protocols                                                      |    |
| 47 |                        |                      |                                                                |    |
| 48 |                        |                      |                                                                |    |
| 49 |                        |                      |                                                                |    |
| 50 |                        |                      |                                                                |    |
| 51 |                        |                      |                                                                |    |
| 52 |                        |                      |                                                                |    |
| 53 | Data management        | <a href="#">#19</a>  | Plans for data entry, coding, security, and storage,           | 10 |
| 54 |                        |                      | including any related processes to promote data quality        |    |
| 55 |                        |                      | (eg, double data entry; range checks for data values).         |    |
| 56 |                        |                      |                                                                |    |
| 57 |                        |                      |                                                                |    |
| 58 |                        |                      |                                                                |    |
| 59 |                        |                      |                                                                |    |
| 60 |                        |                      |                                                                |    |

|    |                            |                                                                                  |    |
|----|----------------------------|----------------------------------------------------------------------------------|----|
| 1  |                            | Reference to where details of data management                                    |    |
| 2  |                            |                                                                                  |    |
| 3  |                            | procedures can be found, if not in the protocol                                  |    |
| 4  |                            |                                                                                  |    |
| 5  |                            |                                                                                  |    |
| 6  | Statistics: outcomes       | <a href="#">#20a</a> Statistical methods for analysing primary and secondary     | 11 |
| 7  |                            |                                                                                  |    |
| 8  |                            | outcomes. Reference to where other details of the                                |    |
| 9  |                            |                                                                                  |    |
| 10 |                            | statistical analysis plan can be found, if not in the protocol                   |    |
| 11 |                            |                                                                                  |    |
| 12 |                            |                                                                                  |    |
| 13 | Statistics: additional     | <a href="#">#20b</a> Methods for any additional analyses (eg, subgroup and       | 11 |
| 14 |                            |                                                                                  |    |
| 15 | analyses                   | adjusted analyses)                                                               |    |
| 16 |                            |                                                                                  |    |
| 17 |                            |                                                                                  |    |
| 18 | Statistics: analysis       | <a href="#">#20c</a> Definition of analysis population relating to protocol non- | 11 |
| 19 |                            |                                                                                  |    |
| 20 | population and             | adherence (eg, as randomised analysis), and any statistical                      |    |
| 21 |                            |                                                                                  |    |
| 22 | missing data               | methods to handle missing data (eg, multiple imputation)                         |    |
| 23 |                            |                                                                                  |    |
| 24 |                            |                                                                                  |    |
| 25 |                            |                                                                                  |    |
| 26 | <b>Methods: Monitoring</b> |                                                                                  |    |
| 27 |                            |                                                                                  |    |
| 28 |                            |                                                                                  |    |
| 29 | Data monitoring:           | <a href="#">#21a</a> Composition of data monitoring committee (DMC);             | 12 |
| 30 |                            |                                                                                  |    |
| 31 | formal committee           | summary of its role and reporting structure; statement of                        |    |
| 32 |                            |                                                                                  |    |
| 33 |                            | whether it is independent from the sponsor and competing                         |    |
| 34 |                            |                                                                                  |    |
| 35 |                            | interests; and reference to where further details about its                      |    |
| 36 |                            |                                                                                  |    |
| 37 |                            | charter can be found, if not in the protocol. Alternatively, an                  |    |
| 38 |                            |                                                                                  |    |
| 39 |                            | explanation of why a DMC is not needed                                           |    |
| 40 |                            |                                                                                  |    |
| 41 |                            |                                                                                  |    |
| 42 |                            |                                                                                  |    |
| 43 |                            |                                                                                  |    |
| 44 | Data monitoring:           | <a href="#">#21b</a> Description of any interim analyses and stopping            | 12 |
| 45 |                            |                                                                                  |    |
| 46 | interim analysis           | guidelines, including who will have access to these interim                      |    |
| 47 |                            |                                                                                  |    |
| 48 |                            | results and make the final decision to terminate the trial                       |    |
| 49 |                            |                                                                                  |    |
| 50 |                            |                                                                                  |    |
| 51 | Harms                      | <a href="#">#22</a> Plans for collecting, assessing, reporting, and managing     | 10 |
| 52 |                            |                                                                                  |    |
| 53 |                            | solicited and spontaneously reported adverse events and                          |    |
| 54 |                            |                                                                                  |    |
| 55 |                            | other unintended effects of trial interventions or trial                         |    |
| 56 |                            |                                                                                  |    |
| 57 |                            |                                                                                  |    |
| 58 |                            |                                                                                  |    |
| 59 |                            |                                                                                  |    |
| 60 |                            |                                                                                  |    |

|    |                      |                                                                                  |     |
|----|----------------------|----------------------------------------------------------------------------------|-----|
| 1  |                      | conduct                                                                          |     |
| 2  |                      |                                                                                  |     |
| 3  |                      |                                                                                  |     |
| 4  | Auditing             | <a href="#">#23</a> Frequency and procedures for auditing trial conduct, if any, | 12  |
| 5  |                      |                                                                                  |     |
| 6  |                      | and whether the process will be independent from                                 |     |
| 7  |                      |                                                                                  |     |
| 8  |                      | investigators and the sponsor                                                    |     |
| 9  |                      |                                                                                  |     |
| 10 |                      |                                                                                  |     |
| 11 | <b>Ethics and</b>    |                                                                                  |     |
| 12 |                      |                                                                                  |     |
| 13 | <b>dissemination</b> |                                                                                  |     |
| 14 |                      |                                                                                  |     |
| 15 |                      |                                                                                  |     |
| 16 | Research ethics      | <a href="#">#24</a> Plans for seeking research ethics committee / institutional  | 12  |
| 17 |                      |                                                                                  |     |
| 18 | approval             | review board (REC / IRB) approval                                                |     |
| 19 |                      |                                                                                  |     |
| 20 |                      |                                                                                  |     |
| 21 |                      |                                                                                  |     |
| 22 | Protocol             | <a href="#">#25</a> Plans for communicating important protocol modifications     | 12  |
| 23 |                      |                                                                                  |     |
| 24 | amendments           | (eg, changes to eligibility criteria, outcomes, analyses) to                     |     |
| 25 |                      |                                                                                  |     |
| 26 |                      | relevant parties (eg, investigators, REC / IRBs, trial                           |     |
| 27 |                      |                                                                                  |     |
| 28 |                      | participants, trial registries, journals, regulators)                            |     |
| 29 |                      |                                                                                  |     |
| 30 |                      |                                                                                  |     |
| 31 |                      |                                                                                  |     |
| 32 | Consent or assent    | <a href="#">#26a</a> Who will obtain informed consent or assent from potential   | 13  |
| 33 |                      |                                                                                  |     |
| 34 |                      | trial participants or authorised surrogates, and how (see                        |     |
| 35 |                      |                                                                                  |     |
| 36 |                      | Item 32)                                                                         |     |
| 37 |                      |                                                                                  |     |
| 38 |                      |                                                                                  |     |
| 39 | Consent or assent:   | <a href="#">#26b</a> Additional consent provisions for collection and use of     | n/a |
| 40 |                      |                                                                                  |     |
| 41 | ancillary studies    | participant data and biological specimens in ancillary                           |     |
| 42 |                      |                                                                                  |     |
| 43 |                      | studies, if applicable                                                           |     |
| 44 |                      |                                                                                  |     |
| 45 |                      |                                                                                  |     |
| 46 |                      |                                                                                  |     |
| 47 | Confidentiality      | <a href="#">#27</a> How personal information about potential and enrolled        | 13  |
| 48 |                      |                                                                                  |     |
| 49 |                      | participants will be collected, shared, and maintained in                        |     |
| 50 |                      |                                                                                  |     |
| 51 |                      | order to protect confidentiality before, during, and after the                   |     |
| 52 |                      |                                                                                  |     |
| 53 |                      | trial                                                                            |     |
| 54 |                      |                                                                                  |     |
| 55 |                      |                                                                                  |     |
| 56 |                      |                                                                                  |     |
| 57 | Declaration of       | <a href="#">#28</a> Financial and other competing interests for principal        | 13  |
| 58 |                      |                                                                                  |     |
| 59 |                      |                                                                                  |     |
| 60 |                      |                                                                                  |     |

|    |                       |                      |                                                                 |     |
|----|-----------------------|----------------------|-----------------------------------------------------------------|-----|
| 1  | interests             |                      | investigators for the overall trial and each study site         |     |
| 2  |                       |                      |                                                                 |     |
| 3  |                       |                      |                                                                 |     |
| 4  | Data access           | <a href="#">#29</a>  | Statement of who will have access to the final trial dataset,   | 13  |
| 5  |                       |                      | and disclosure of contractual agreements that limit such        |     |
| 6  |                       |                      | access for investigators                                        |     |
| 7  |                       |                      |                                                                 |     |
| 8  |                       |                      |                                                                 |     |
| 9  |                       |                      |                                                                 |     |
| 10 |                       |                      |                                                                 |     |
| 11 | Ancillary and post    | <a href="#">#30</a>  | Provisions, if any, for ancillary and post-trial care, and for  | n/a |
| 12 |                       |                      | compensation to those who suffer harm from trial                |     |
| 13 | trial care            |                      | participation                                                   |     |
| 14 |                       |                      |                                                                 |     |
| 15 |                       |                      |                                                                 |     |
| 16 |                       |                      |                                                                 |     |
| 17 |                       |                      |                                                                 |     |
| 18 |                       |                      |                                                                 |     |
| 19 | Dissemination policy: | <a href="#">#31a</a> | Plans for investigators and sponsor to communicate trial        | 14  |
| 20 |                       |                      | results to participants, healthcare professionals, the public,  |     |
| 21 | trial results         |                      | and other relevant groups (eg, via publication, reporting in    |     |
| 22 |                       |                      | results databases, or other data sharing arrangements),         |     |
| 23 |                       |                      | including any publication restrictions                          |     |
| 24 |                       |                      |                                                                 |     |
| 25 |                       |                      |                                                                 |     |
| 26 |                       |                      |                                                                 |     |
| 27 |                       |                      |                                                                 |     |
| 28 |                       |                      |                                                                 |     |
| 29 |                       |                      |                                                                 |     |
| 30 |                       |                      |                                                                 |     |
| 31 | Dissemination policy: | <a href="#">#31b</a> | Authorship eligibility guidelines and any intended use of       | 14  |
| 32 |                       |                      | professional writers                                            |     |
| 33 | authorship            |                      |                                                                 |     |
| 34 |                       |                      |                                                                 |     |
| 35 |                       |                      |                                                                 |     |
| 36 | Dissemination policy: | <a href="#">#31c</a> | Plans, if any, for granting public access to the full protocol, | n/a |
| 37 |                       |                      | participant-level dataset, and statistical code                 |     |
| 38 | reproducible research |                      |                                                                 |     |
| 39 |                       |                      |                                                                 |     |
| 40 |                       |                      |                                                                 |     |
| 41 |                       |                      |                                                                 |     |
| 42 | <b>Appendices</b>     |                      |                                                                 |     |
| 43 |                       |                      |                                                                 |     |
| 44 |                       |                      |                                                                 |     |
| 45 | Informed consent      | <a href="#">#32</a>  | Model consent form and other related documentation given        | n/a |
| 46 |                       |                      | to participants and authorised surrogates                       |     |
| 47 | materials             |                      |                                                                 |     |
| 48 |                       |                      |                                                                 |     |
| 49 |                       |                      |                                                                 |     |
| 50 | Biological specimens  | <a href="#">#33</a>  | Plans for collection, laboratory evaluation, and storage of     | n/a |
| 51 |                       |                      | biological specimens for genetic or molecular analysis in       |     |
| 52 |                       |                      | the current trial and for future use in ancillary studies, if   |     |
| 53 |                       |                      | applicable                                                      |     |
| 54 |                       |                      |                                                                 |     |
| 55 |                       |                      |                                                                 |     |
| 56 |                       |                      |                                                                 |     |
| 57 |                       |                      |                                                                 |     |
| 58 |                       |                      |                                                                 |     |
| 59 |                       |                      |                                                                 |     |
| 60 |                       |                      |                                                                 |     |

1 The SPIRIT Explanation and Elaboration paper is distributed under the terms of the Creative  
2 Commons Attribution License CC-BY-NC. This checklist was completed on 04. March 2022 using  
3 <https://www.goodreports.org/>, a tool made by the [EQUATOR Network](#) in collaboration with  
4 [Penelope.ai](#)  
5  
6  
7  
8  
9  
10  
11  
12  
13  
14  
15  
16  
17  
18  
19  
20  
21  
22  
23  
24  
25  
26  
27  
28  
29  
30  
31  
32  
33  
34  
35  
36  
37  
38  
39  
40  
41  
42  
43  
44  
45  
46  
47  
48  
49  
50  
51  
52  
53  
54  
55  
56  
57  
58  
59  
60

# BMJ Open

**A prospective double-blind randomized controlled trial protocol comparing bone marrow aspirate concentrate intra-articular injection combined with subchondral injection versus intra-articular injection alone for the treatment of symptomatic knee osteoarthritis.**

|                                 |                                                                                                                                                                                                                                                                                                                                                                                                                                                                                                                                                                                                                                                                                                                                                                                                                                                                                                                                                                                                                                                                                                                                                                                      |
|---------------------------------|--------------------------------------------------------------------------------------------------------------------------------------------------------------------------------------------------------------------------------------------------------------------------------------------------------------------------------------------------------------------------------------------------------------------------------------------------------------------------------------------------------------------------------------------------------------------------------------------------------------------------------------------------------------------------------------------------------------------------------------------------------------------------------------------------------------------------------------------------------------------------------------------------------------------------------------------------------------------------------------------------------------------------------------------------------------------------------------------------------------------------------------------------------------------------------------|
| Journal:                        | <i>BMJ Open</i>                                                                                                                                                                                                                                                                                                                                                                                                                                                                                                                                                                                                                                                                                                                                                                                                                                                                                                                                                                                                                                                                                                                                                                      |
| Manuscript ID                   | bmjopen-2022-062632.R1                                                                                                                                                                                                                                                                                                                                                                                                                                                                                                                                                                                                                                                                                                                                                                                                                                                                                                                                                                                                                                                                                                                                                               |
| Article Type:                   | Protocol                                                                                                                                                                                                                                                                                                                                                                                                                                                                                                                                                                                                                                                                                                                                                                                                                                                                                                                                                                                                                                                                                                                                                                             |
| Date Submitted by the Author:   | 30-Jul-2022                                                                                                                                                                                                                                                                                                                                                                                                                                                                                                                                                                                                                                                                                                                                                                                                                                                                                                                                                                                                                                                                                                                                                                          |
| Complete List of Authors:       | Silva, Simone; IRCCS Istituto Ortopedico Rizzoli, II Orthopaedic and Traumatologic Clinic<br>Andriolo, Luca; IRCCS Istituto Ortopedico Rizzoli, II Orthopaedic and Traumatologic Clinic<br>Boffa, Angelo ; IRCCS Istituto Ortopedico Rizzoli, II Orthopaedic and Traumatologic Clinic<br>Di Martino, Alessandro; IRCCS Istituto Ortopedico Rizzoli, II Orthopaedic and Traumatologic Clinic<br>Reale, Davide; Istituto Ortopedico Rizzoli Istituto di Ricovero e Cura a Carattere Scientifico, II Orthopaedic and Traumatologic Clinic<br>Vara, Giulio; IRCCS Istituto Ortopedico Rizzoli, Diagnostic and Interventional Radiology<br>Marco, Miceli; IRCCS Istituto Ortopedico Rizzoli, Diagnostic and Interventional Radiology<br>Cavallo, Carola; IRCCS Istituto Ortopedico Rizzoli, Laboratory RAMSES, Research & Innovation Technology Department<br>Grigolo, Brunella; IRCCS Istituto Ortopedico Rizzoli, Laboratory RAMSES, Research & Innovation Technology Department<br>Zaffagnini, Stefano ; IRCCS Istituto Ortopedico Rizzoli, II Orthopaedic and Traumatologic Clinic<br>Filardo, Giuseppe; IRCCS Istituto Ortopedico Rizzoli, Applied and Translational Research Center |
| <b>Primary Subject Heading</b>: | Surgery                                                                                                                                                                                                                                                                                                                                                                                                                                                                                                                                                                                                                                                                                                                                                                                                                                                                                                                                                                                                                                                                                                                                                                              |
| Secondary Subject Heading:      | Evidence based practice                                                                                                                                                                                                                                                                                                                                                                                                                                                                                                                                                                                                                                                                                                                                                                                                                                                                                                                                                                                                                                                                                                                                                              |
| Keywords:                       | ORTHOPAEDIC & TRAUMA SURGERY, Adult orthopaedics < ORTHOPAEDIC & TRAUMA SURGERY, Orthopaedic & trauma surgery < SURGERY, Knee < ORTHOPAEDIC & TRAUMA SURGERY                                                                                                                                                                                                                                                                                                                                                                                                                                                                                                                                                                                                                                                                                                                                                                                                                                                                                                                                                                                                                         |
|                                 |                                                                                                                                                                                                                                                                                                                                                                                                                                                                                                                                                                                                                                                                                                                                                                                                                                                                                                                                                                                                                                                                                                                                                                                      |



1  
2  
3  
4  
5  
6  
7  
8  
9  
10  
11  
12  
13  
14  
15  
16  
17  
18  
19  
20  
21  
22  
23  
24  
25  
26  
27  
28  
29  
30  
31  
32  
33  
34  
35  
36  
37  
38  
39  
40  
41  
42  
43  
44  
45  
46  
47  
48  
49  
50  
51  
52  
53  
54  
55  
56  
57  
58  
59  
60

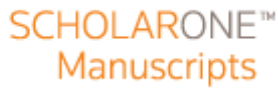

1  
2  
3 1 **A prospective double-blind randomized controlled trial protocol comparing**  
4  
5 2 **bone marrow aspirate concentrate intra-articular injection combined with**  
6  
7 3 **subchondral injection versus intra-articular injection alone**  
8  
9 4 **for the treatment of symptomatic knee osteoarthritis.**  
10  
11  
12 5  
13  
14

15 6 Simone Silva<sup>1</sup>, Luca Andriolo<sup>1</sup>, Angelo Boffa<sup>1</sup>, Alessandro Di Martino<sup>1</sup>, Davide Reale<sup>2,1</sup>, Giulio  
16  
17 7 Vara<sup>2</sup>, Marco Miceli<sup>2</sup>, Carola Cavallo<sup>3</sup>, Brunella Grigolo<sup>3</sup>, Stefano Zaffagnini<sup>1</sup>, Giuseppe Filardo<sup>4</sup>  
18  
19 8

20  
21  
22 9 (1) II Orthopaedic and Traumatologic Clinic, IRCCS Istituto Ortopedico Rizzoli, Bologna, Italy

23  
24 10 (2) Diagnostic and Interventional Radiology, IRCCS Istituto Ortopedico Rizzoli, Bologna, Italy

25  
26 11 (3) Laboratory RAMSES, Research & Innovation Technology Department, IRCCS Istituto  
27  
28 12 Ortopedico Rizzoli, Bologna, Italy

29  
30 13 (4) Applied and Translational Research center (ATRC), IRCCS Istituto Ortopedico Rizzoli,  
31  
32 14 Bologna, Italy  
33  
34  
35  
36 15  
37

38 16 *Corresponding author:*

39  
40 17 Simone Silva, MD, II Orthopaedic and Traumatologic Clinic, IRCCS Istituto Ortopedico Rizzoli,  
41  
42 18 Via Di Barbiano,1/10 - 40136 Bologna, Italy. Tel. +39 051 6366567. Fax +39 051 583789  
43  
44 19 E-mail: simone.silva.dls@gmail.com. ORCID-ID: 0000-0003-0955-4475  
45  
46  
47 20  
48

49 21 *Keywords:* Osteoarthritis; Mesenchymal Stromal Cells; Subchondral injections; Bone marrow  
50  
51 22 aspirate concentrate; BMAC  
52  
53  
54 23

55  
56 24 *Word Count:* 3991 words (excluding title page, references, figures and tables)  
57  
58  
59 25  
60  
26

1  
2  
3 27 **ABSTRACT**  
4  
5

6 28 *Introduction:* Subchondral and intra-articular injections of bone marrow aspirate concentrate  
7  
8 29 (BMAC) showed promising results for knee OA patients. To date, there is no evidence to  
9  
10 30 demonstrate whether the combination of these treatments provides higher benefits than the intra-  
11  
12 31 articular injection alone.  
13  
14  
15

16 32 *Methods and analysis:* Eighty-six patients with symptomatic knee OA (aged between 40 and 70) are  
17  
18 33 randomized to BMAC intra-articular injection combined with subchondral BMAC injection or  
19  
20 34 BMAC intra-articular injection alone in a ratio of 1:1. The primary outcome is the Western Ontario  
21  
22 35 and McMaster Universities Osteoarthritis Index (WOMAC), the secondary outcomes the  
23  
24 36 International Knee Documentation Committee (IKDC) Subjective and Objective Knee Evaluation  
25  
26 37 Form, the Tegner activity scale, the EuroQol-visual analogue scale (EQ-VAS), and the health  
27  
28 38 questionnaire EQ-5D score. Additional CT and MRI evaluations are performed at the baseline  
29  
30 39 assessment and at the final 12-month follow-up. The hypothesis is that the combined injection  
31  
32 40 provides higher knee pain and function improvement compared to BMAC intra-articular injection  
33  
34 41 alone. The primary analysis follows an intention-to-treat principle.  
35  
36  
37  
38  
39

40 42 *Ethics and dissemination:* The study protocol has been approved by the Emilia Wide Area Ethical  
41  
42 43 Committee of the Emilia-Romagna Region (CE-AVEC), Bologna, Italy. Written informed consent  
43  
44 44 is obtained from all the participants. Findings of this study will be disseminated the through peer-  
45  
46 45 reviewed publications and conference presentations.  
47  
48  
49  
50 46  
51  
52  
53  
54  
55  
56  
57  
58  
59  
60

1  
2  
3 47 *Strengths and limitations of this study:*  
4  
5  
6 48  
7

- 8 49 • This is the first prospective, randomized, double-blind and controlled trial evaluating  
9  
10 50 results of BMAC intra-articular injection combined with subchondral injection compared to  
11  
12 51 BMAC intra-articular injection alone in knee OA.  
13  
14  
15 52 • Patients are analyzed using PROMs, objective measures, MRI and CT examination,  
16  
17 53 and biomarker evaluation.  
18  
19  
20 54 • Patient base-line characteristics and disease-related factors can help to better define  
21  
22 55 the aspects that make different individuals more or less responsive to this type of treatments.  
23  
24 56 • The uncontrolled pain medication use by patients (although being discouraged) could  
25  
26 57 influence the primary outcome and this is a relevant limitation of the study.  
27  
28  
29 58 • This study can clarify the benefits, and limitations, of the newly proposed  
30  
31 59 combination of intra-articular and subchondral BMAC injections, providing clear  
32  
33 60 indications for the clinical practice.  
34  
35  
36 61  
37

38 62 *Trial registration:* Clinical Trials.gov Identifier number NCT03876795  
39  
40  
41 63

42  
43 64 *Protocol version:* Version 1 (14 May 2018)  
44  
45 65  
46

47 66 *Ethical approval:* (Prot. n. 0003132) for study protocol Interface (identifier: 207/2018/Sper/IOR)  
48  
49 67 was obtained on 5 May 2018 from the Ethical Committee Area Vasta Emilia Centro (CE-AVEC) of  
50  
51 68 the Emilia-Romagna Region settled at the University General Hospital Sant'Orsola-Malpighi of  
52  
53 69 Bologna.  
54  
55  
56  
57 70  
58

59 71 *Roles and responsibilities:*  
60

1  
2  
3  
4  
5  
6  
7  
8  
9  
10  
11  
12  
13  
14  
15  
16  
17  
18  
19  
20  
21  
22  
23  
24  
25  
26  
27  
28  
29  
30  
31  
32  
33  
34  
35  
36  
37  
38  
39  
40  
41  
42  
43  
44  
45  
46  
47  
48  
49  
50  
51  
52  
53  
54  
55  
56  
57  
58  
59  
60

- 72 Simone Silva<sup>1</sup> (simone.silva@ior.it): Physician and investigator
- 73 Luca Andriolo<sup>1</sup> (lucas.andriolo@ior.it): Physician and investigator
- 74 Angelo Boffa<sup>1</sup> (angeloboffa@libero.it): Physician and investigator
- 75 Alessandro Di Martino<sup>1</sup> (aledimartino75@gmail.com): Senior physician and principal investigator
- 76 Davide Reale<sup>1</sup> (dawidh.reale@gmail.com): Physician and investigator
- 77 Giulio Vara<sup>2</sup> (giulio.vara@gmail.com): Physician and imaging evaluator
- 78 Marco Miceli<sup>2</sup> (marco.miceli@ior.it): Physicians and senior imaging evaluator
- 79 Carola Cavallo<sup>3</sup> (carola.cavallo@ior.it): Biologist for products and patients' characterization
- 80 Brunella Grigolo<sup>3</sup> (brunella.grigolo@ior.it): Senior biologist for products and patients' characterization
- 81 characterization
- 82 Stefano Zaffagnini<sup>1</sup> (stefano.zaffagnini@unibo.it): Senior physician and investigator
- 83 Giuseppe Filardo<sup>4</sup> (ortho@gfilardo.com): Senior author, project PI, coordinator
- 84
- 85 (1) II Orthopaedic and Traumatologic Clinic, IRCCS Istituto Ortopedico Rizzoli, 40136 Bologna, Italy
- 86 Italy
- 87 (2) Diagnostic and Interventional Radiology, IRCCS Istituto Ortopedico Rizzoli, Bologna 40136, Italy
- 88 Italy
- 89 (3) Laboratory RAMSES, Research & Innovation Technology Department, IRCCS Istituto Ortopedico Rizzoli, 40136 Bologna, Italy
- 90 Ortopedico Rizzoli, 40136 Bologna, Italy
- 91 (4) Applied and Translational Research center (ATRC), IRCCS Istituto Ortopedico Rizzoli, 40136 Bologna, Italy
- 92 Bologna, Italy

## 94 INTRODUCTION

95  
96 Knee osteoarthritis (OA) is a chronic, degenerative disease leading to irreversible structural and  
97 functional changes in the entire joint, including subchondral bone sclerosis and cartilage loss, and  
98 progressively determines debilitating pain and loss of function.[1-2] It affects a large part of the  
99 aging population with a high impact on patients and healthcare costs.[3] Total knee arthroplasty  
100 represents a definitive solution to address knee OA, but it is also encumbered by several  
101 complications.[4] Conservative approaches, such as physical therapy and anti-inflammatory drugs,  
102 should be pursued, but their benefits are generally temporary with short-term relief, and they are not  
103 able to affect the natural course of the disease progression.[5] Thus, to delay or avoid the need for  
104 arthroplasty, research efforts have been made to find new minimally invasive and more effective  
105 procedures to address knee OA.

106 In this light, the use of orthobiologics is gaining increasing interest due to the availability of several  
107 promising products, ranging from blood-derivatives (platelet-rich plasma - PRP) to minimally  
108 manipulated mesenchymal stromal cells (MSCs) harvested from bone marrow or adipose tissue.  
109 Although the intra-articular use of these products for the treatment of knee OA provided overall  
110 positive results, the improvement in terms of pain relief and function remains partial and not always  
111 satisfactory.[6] Thus, a new approach has been recently proposed to further exploit the potential of  
112 biologic products by targeting the subchondral bone.[7] This strategy is supported by the evidence  
113 revealing that subchondral bone alterations may play a critical role in both the pathophysiology and  
114 progression of knee OA.[8][9] It has been suggested that with age and knee OA the number and  
115 functionality of MSCs present in the subchondral bone of the knee may decrease. Therefore, MSCs  
116 subchondral injections could address this deficiency underlying the pathophysiology by providing  
117 many bioactive mediators which have been shown to exert positive effects on joint tissues.[10]  
118 MSCs subchondral bone injections showed to be safe and may provide even better results than  
119 MSC intra-articular injections addressing knee OA in terms of survival to knee arthroplasty.[11]

1  
2  
3 120 Moreover, the combination of subchondral and intra-articular injections of bone marrow aspirate  
4  
5 121 concentrate (BMAC) already showed promising results in terms of safety and clinical  
6  
7  
8 122 outcomes.[12] However, beside promising early findings and the increasing use of this approach in  
9  
10 123 the clinical practice, there is only limited and low-level evidence, and it would be clinically relevant  
11  
12 124 to evaluate with a high-level study design the real benefit provided by the addition of these  
13  
14  
15 125 subchondral injections to improve the results of BMAC intra-articular injections for knee OA.  
16

### 17 126 18 19 127 *Objectives and trial design*

20  
21 128 A double-blinded randomized controlled trial (RCT) was designed to compare the efficacy of a  
22  
23  
24 129 combination of intra-articular and subchondral injections of BMAC (treatment group) versus  
25  
26 130 BMAC intra-articular injection alone (control group) to treat knee OA, with a 1:1 allocation ratio.  
27  
28  
29 131 The aim of this superiority trial is to evaluate the safety and the clinical potential of this new  
30  
31 132 treatment approach up to one year of follow-up, and to verify the hypothesis that the combination of  
32  
33 133 subchondral and intra-articular injections provides higher knee pain and function improvement  
34  
35 134 compared to BMAC intra-articular injection alone in knee OA.  
36

## 37 135 38 39 136 **METHODS AND ANALYSIS**

### 40 137 *Study setting*

41  
42  
43  
44 138 The study is a single center double-blind RCT, with all activities related to the study performed in a  
45  
46  
47 139 single site, the IRCCS Rizzoli Orthopaedic Institute, Bologna, Italy.

48  
49 140 This trial protocol is produced according to the SPIRIT (Standard Protocol Items:  
50  
51 141 Recommendations for Interventional Trials) reporting guidelines. [13]  
52

### 53 142 54 55 143 *Patient and public involvement*

56  
57  
58 144 Patients are not involved in planning of research questions, outcome measures or design of the  
59  
60 145 study.

1  
2  
3 146  
45 147 *Eligibility criteria*6  
7  
8 148 Patients are recruited according to the following criteria.9  
10 149 Inclusion criteria:

- 11
- 
- 12 150 - Male or female patients, aged between 40 and 70 years old;
- 
- 13
- 
- 14
- 
- 15 151 - OA of the medial compartment of the knee (grade II or III according to the Kellgren-
- 
- 16
- 
- 17 152 Lawrence classification);
- 
- 18
- 
- 19 153 - Failure after at least 6 months of conservative treatment (drug therapy with NSAIDs and
- 
- 20
- 
- 21
- 
- 22 154 painkillers, hyaluronic acid infiltration, corticosteroid infiltration, PRP);
- 
- 23
- 
- 24 155 - Patients' ability and consent to participate in clinical and radiological follow-up;
- 
- 25
- 
- 26 156 - Signature of informed consent.

27  
28 157 Exclusion criteria:

- 29
- 
- 30
- 
- 31 158 - Patients with trauma in the 6 months prior to surgery;
- 
- 32
- 
- 33 159 - Patients with malignancy;
- 
- 34
- 
- 35 160 - Patients suffering from rheumatic diseases;
- 
- 36
- 
- 37
- 
- 38 161 - Patients suffering from uncompensated diabetes;
- 
- 39
- 
- 40 162 - Patients suffering from uncompensated thyroid metabolic disorders;
- 
- 41
- 
- 42 163 - Patients abusing alcoholic beverages or drugs;
- 
- 43
- 
- 44
- 
- 45 164 - Patients with axial deviations
- $> 5^\circ$
- ;
- 
- 46
- 
- 47 165 - Body Mass Index
- $> 35$
- ;
- 
- 48
- 
- 49 166 - Patients treated with joint injections in the previous 6 months;
- 
- 50
- 
- 51 167 - Patients treated with surgery at the same knee in the previous 12 months.

52  
53  
54 168  
55  
56 169 *Intervention*57  
58 170 All patients are treated by orthopedic surgeons with established experience in cartilage and  
59  
60 171 osteoarthritis orthobiologic procedures. The procedure is performed in a single step in the operating



1  
2  
3 172 room with patients in supine position under spinal loco-regional anaesthesia. The ipsilateral hip is  
4  
5 173 sterilely prepared and draped for anterior iliac crest bone marrow aspiration. The anterior superior  
6  
7  
8 174 iliac spine is the anatomical landmark for a small surgical incision. A diamond tip trocar is inserted  
9  
10 175 in this point and then advanced into the bone marrow using a drill. Bone marrow is collected using  
11  
12 176 two 30 ml syringes coated with heparin for a total of 60 ml. The harvested bone marrow is filtered  
13  
14  
15 177 with a heparin washed filter and then centrifuged through the Magellan® centrifuge (Arteriocyte  
16  
17 178 Medical Systems, MA, USA) at a rate of 3600 RPM for approximately 15 minutes, thus obtaining  
18  
19 179 10 ml of BMAC. The BMAC procedure involved a kit available in the clinical practice. In fact, the  
20  
21  
22 180 purpose of the study was not to evaluate a new product, but rather to explore the potential of  
23  
24 181 applying BMAC also at the subchondral bone level, to give indications on the potential of this  
25  
26 182 approach for physicians considering this technique for their clinical practice.  
27  
28 183 For each patient, BMAC samples that are not used for surgical treatment are sent to the laboratory  
29  
30  
31 184 for the count of mononuclear cells, cell clonogenic ability by colony forming unit-fibroblast test and  
32  
33 185 phenotypical characterization by flow-cytometry evaluation.  
34  
35 186 Concomitantly with the bone marrow concentration process, all patients undergo an arthroscopic  
36  
37  
38 187 evaluation to confirm the location on both medial femoral condyle and medial tibial plateau  
39  
40 188 involved by osteoarthritic lesions. Arthroscopy is done using the standard antero-lateral, antero-  
41  
42 189 medial, and supero-medial portals. If the arthroscopic examination reveals intra-articular problems  
43  
44  
45 190 (excluding minor arthroscopic shaving) requiring surgical intervention which may affect the results  
46  
47 191 of the procedure, the patient is excluded from the study.  
48  
49 192 Once the arthroscopy and the BMAC procedure are completed, the injections are performed. The  
50  
51  
52 193 treatment group receives two 2.5 ml subchondral BMAC injections, that are performed inserting  
53  
54 194 two 8-Gauge trocars through the supero-medial and antero-medial arthroscopic portals and are  
55  
56 195 manually introduced with clockwise and anticlockwise movements, under fluoroscopic control, into  
57  
58 196 the bone of both medial femoral condyle and tibial plateau. Following arthroscopic portals suture,  
59  
60  
197 both groups of treatment receive a 3ml intra-articular injection of BMAC using a lateral

1  
2  
3 198 suprapatellar approach. An elastic bandage is made after wounds medication. The whole procedure  
4  
5 199 is presented in Figure 1.

7  
8 200 Postoperatively, patients are discharged on the same day of the procedure or the day after, based on  
9  
10 201 patient condition. Pain control is prescribed as needed with analgesics only in the immediate period  
11  
12 202 after treatment, and thromboembolic prophylaxis is prescribed for two weeks. During the same  
13  
14 203 time, patients are taught to walk with the support of two crutches to allow a partial weight-bearing  
15  
16  
17 204 on the operated limb. Cryotherapy is started within the first 24 hours. Passive mobilisation and  
18  
19 205 quadriceps isometric exercises are started at the second post-operative day. Patients are permitted to  
20  
21 206 return to most of their daily activities as tolerated once they reach full weight-bearing. No other  
22  
23  
24 207 conservative treatments are prescribed during the study period. Joint impacting sport activities are  
25  
26 208 discouraged within the first month after treatment.

### 27 28 29 209 30 31 210 *Outcomes*

32  
33 211 The primary outcome is the Western Ontario and McMaster Universities Osteoarthritis Index  
34  
35 212 (WOMAC), a 24 items self-administered questionnaire taking into account articular pain and  
36  
37 213 stiffness and physical function limitations due to knee OA. It ranges from 0 to 96 points and higher  
38  
39  
40 214 WOMAC scores indicate worse pain, stiffness, and functional limitations. The total WOMAC score  
41  
42 215 was chosen as primary outcome aiming at capturing a more comprehensive assessment of  
43  
44 216 symptoms and function benefits offered by the treatments.

45  
46  
47 217 The secondary outcomes include the International Knee Documentation Committee (IKDC)  
48  
49 218 Subjective and Objective Knee Evaluation Form (a patient-completed tool taking into account knee  
50  
51 219 symptoms, knee function, and sport activity), the Tegner activity scale (a one-item score based on  
52  
53  
54 220 work and sports activities), the EuroQol-visual analogue scale (EQ-VAS) that provides an  
55  
56 221 assessment of patients global health, the health questionnaire EQ-5D score (a 5 level self-assessed,  
57  
58 222 health related, quality of life questionnaire).

1  
2  
3 223 Patients also undergo MRI and CT assessments. MRI scans are obtained with a high-resolution 3  
4  
5 224 Tesla MRI scanner with PD-weighted Turbo Spin Echo 3D sequences with and without fat  
6  
7  
8 225 saturation (FS), 3D T2\* Gradient Echo (MERGE) with FS, axial PD-weighted Fast Spin Echo  
9  
10 226 sequences with FS, and Multi-Echo T2 Mapping on the sagittal plane with 8 different Echo Times.  
11  
12 227 The Whole-Organ Magnetic Resonance Imaging Score (WORMS) is used to assess seven features  
13  
14  
15 228 of the treated knees: articular cartilage morphology, bone marrow oedema, subchondral cysts,  
16  
17 229 articular profile, marginal osteophytes, meniscal integrity, and synovitis.  
18  
19 230 Articular cartilage morphology is examined with the 3D MERGE and the T2 Mapping; bone  
20  
21  
22 231 marrow oedema and synovitis with the PD fat sat sequences, the articular profiles with the PD and  
23  
24 232 MERGE sequences, and the meniscal integrity with the DP sequences.  
25  
26 233 CT knee scans are obtained with a 64-channels CT scanner to better assess the structural resolution  
27  
28  
29 234 of bone trabeculae as well as to assess the presence of osteophytes, calcifications, and cancellous  
30  
31 235 bone microcysts. The images are acquired using a slice thickness of 1.25 mm and an interval of  
32  
33 236 0.625 mm at 120kV with 250 mA, post-processed with the “Bone” filter, and reformatted in the  
34  
35 237 coronal and sagittal plane.  
36  
37  
38 238 Blood samples are obtained from participants before treatment and at 2, 6, and 12 months of follow-  
39  
40 239 up. Samples are analysed for inflammatory (IL-1 $\beta$ , TNF $\alpha$ ) and OA progression markers (Cleavage  
41  
42 240 of Type II Collagen, Serum C-telopeptide fragments of type II collagen).  
43  
44  
45 241  
46  
47 242 *Participant timeline*  
48  
49 243 Research assistants first conduct a screening of potential candidates over the telephone. If early  
50  
51 244 checks of study eligibility are favourable, participants are booked in for a face-to-face screening  
52  
53  
54 245 visit with an orthopaedic specialist to confirm eligibility and explain the study protocol. After the  
55  
56 246 screening visit, patients complete the questionnaires, undergo a knee MRI and CT, and sign the  
57  
58 247 informed written consent. Patient enrolment started on November 2019. The first patient was  
59  
60 248 treated in December 2019. Follow-up assessments is performed at 2, 6, and 12 months

postoperatively with patient questionnaires and blood samples. At the final 12-month follow-up patients undergo knee MRI and CT scans. Due to operational delays caused by the COVID-19 pandemic, patient treatment is still ongoing; the study conclusion is foreseen before the end of 2023. Participant timeline is outlined in Table 1.

**Table 1.** The study procedures schedule.

|                       | Before treatment | Treatment | 2-month follow-up | 6-month follow-up | 12-month follow-up |
|-----------------------|------------------|-----------|-------------------|-------------------|--------------------|
| Patient eligibility   | X                |           |                   |                   |                    |
| Informed consent      | X                |           |                   |                   |                    |
| WOMAC                 | X                |           | X                 | X                 | X                  |
| IKDC score            | X                |           | X                 | X                 | X                  |
| Tegner activity score | X                |           | X                 | X                 | X                  |
| EQ-5D and EQ-VAS      | X                |           | X                 | X                 | X                  |
| Blood sample          |                  | X         | X                 | X                 | X                  |
| BMAC sample           |                  | X         |                   |                   |                    |
| MRI                   | X                |           |                   |                   | X                  |
| CT                    | X                |           |                   |                   | X                  |
| AE reporting          |                  | X         | X                 | X                 | X                  |

AE: Adverse Event; BMAC: Bone Marrow Aspirate Concentrate; CT: Computed tomography; EQ-5D: European Quality of Life Five Dimension; EQ-VAS: European Quality - Visual Analog Scale; IKDC: International Knee Documentation Committee; MRI: magnetic resonance imaging; WOMAC: Western Ontario and McMaster Universities Osteoarthritis Index

### *Recruitment*

Patients undergo an outpatient visit conducted by properly trained medical staff belonging to the team of orthopaedic surgeons of the Rizzoli Orthopaedic Institute, which assess patients' eligibility and take care of patient education.

### *Blinding*

This is a double-blind RCT with both participants and physicians assessing outcomes being blinded to treatment allocation. Only after the evaluation at the 12-month follow-up the blinding is opened and it is revealed to the patient which one of the two treatments was administered.

1  
2  
3  
4  
5  
6  
7  
8  
9  
10  
11  
12  
13  
14  
15  
16  
17  
18  
19  
20  
21  
22  
23  
24  
25  
26  
27  
28  
29  
30  
31  
32  
33  
34  
35  
36  
37  
38  
39  
40  
41  
42  
43  
44  
45  
46  
47  
48  
49  
50  
51  
52  
53  
54  
55  
56  
57  
58  
59  
60

268 The blindness of treated patients is further guaranteed by the same number of surgical access and by  
269 the same length of the surgical incision for both treatments. Early unblinding occurs in case of  
270 premature patients drop-out. The level of blinding prevents from the enhanced placebo effect that a  
271 subchondral injection could add to the placebo effect of the intra-articular injection alone.[14]  
272 Imaging evaluation is provided by experienced radiologists which are blinded as well to the type of  
273 treatment that the patients have received.

### *Allocation*

276 A total of 86 eligible patients are allocated to receive either a combination of intra articular and  
277 subchondral BMAC injection or BMAC intra articular injection alone, in a 1:1 ratio (43 patients for  
278 each group of treatment) based on a computer-generated random numbers randomisation. This is  
279 conducted by research staff members dedicated to study organization and monitoring with no direct  
280 involvement in the study procedures. The randomization list is covered by password and accessible  
281 only by staff members with no direct involvement in the study.

### *Adverse events and assessment process*

284 Adverse events are monitored throughout the study, intraoperatively and at clinical follow-up  
285 evaluations. Standard safety and efficacy monitoring is performed through regular face-to-face  
286 visits and phone calls between visits. The patients are also requested to report any adverse events to  
287 the research staff spontaneously. Every adverse event is recorded in the patient Case Report Form  
288 (CRF). Serious adverse events are considered those resulting in death or being life-threatening,  
289 requiring hospitalization or intervention to prevent permanent impairment or damage; they are  
290 reported in accordance with the requirements of the Ethical Committee. Use of rescue pain  
291 medication is recorded at all visits without a diary and without homogenizing the type of  
292 medication, which is decided by patients autonomously (although discouraged for study purposes).

1  
2  
3 293 To ensure high-quality execution of the trial in accordance with the protocol, all trial staff is trained  
4  
5 294 by the chief investigators and provided with a standard protocol book which contains details of  
6  
7  
8 295 standard operating procedures, trial contacts, visits, measurements, monitoring, and case report  
9  
10 296 forms.

11  
12 297

#### 13 14 15 298 *Data collection methods*

16  
17 299 Data are firstly collected on paper-based case report forms, with the help of research trained  
18  
19 300 orthopaedic residents blinded to treatment allocation, and subsequently trained data analysts process  
20  
21 301 data into electronic form for statistical analysis. Baseline and final MRI and CT knee scans are  
22  
23  
24 302 coded and stored at the Rizzoli Orthopaedic Institute to ensure data quality control. Operative data  
25  
26 303 are collected electronically by the respective surgeons shortly after surgery.

27  
28  
29 304

#### 30 31 305 *Data management*

32  
33 306 Study data are stored in a password-protected spreadsheet on a server that is hosted at the Rizzoli  
34  
35 307 Orthopaedic Institute. Data transfer is encrypted with all data de-identified. Only trained research  
36  
37  
38 308 personnel specifically dedicated to the data handling can access the database and ensures the  
39  
40 309 correspondence of the electronic data with the original paper-based questionnaires and medical  
41  
42 310 charts.

43  
44  
45 311

#### 46 47 312 *Statistical methods*

48  
49 313 A power analysis (G\*Power 3.1.9.2) was conducted using assumptions of 90% of power and 5% of  
50  
51 314 probability of type 1 error ( $\alpha = 0.05$ ), with a SD of 18.2 points based on a pilot study and a  
52  
53  
54 315 hypothesized 10-point difference in total WOMAC score between treatments. Accordingly, 76  
55  
56 316 participants are needed. This leads to a moderate size-effect (0.55) as per the Cohen convention  
57  
58 317 (effects: small  $\geq .20$ , medium  $\geq .50$ , large  $\geq .80$ ), and is in line with other effect sizes and SD  
59  
60 318 reported in the literature. We increased the number of participants to a total of 86 patients (43 in

1  
2  
3 319 each arm) to account for a possible 10% loss to follow-up. The primary analyses are intention-to-  
4  
5 320 treat analyses of primary and secondary outcomes. Per protocol analyses will be performed as the  
6  
7  
8 321 secondary analyses. All those who have started the treatment are considered part of the research,  
9  
10 322 regardless of whether they will complete it. For the missing data, they will be analyzed using the  
11  
12 323 multiple imputation analysis, performed by filling the missing data with random values from the  
13  
14  
15 324 distribution of the variable.

16  
17 325 Continuous variables are be expressed as means and standard deviations if normally distributed,  
18  
19 326 as medians and range if not. Categorical variables are be expressed as frequencies and percentage.  
20  
21  
22 327 Normality of the distribution is be assessed using the Shapiro Wilks test. The Levene test is be used  
23  
24 328 to assess the homoscedasticity of the data. The Repeated Measures ANOVA, followed by the post  
25  
26 329 hoc Sidak pairwise test is performed to compare the scores at different follow-up times. The  
27  
28  
29 330 OneWay ANOVA test is performed to assess the between group differences of continuous and  
30  
31 331 normally distributed and homoscedastic data; the Mann Whitney test is used otherwise. The  
32  
33 332 ANOVA test, followed by the Scheffè post hoc pairwise comparison, is used also to assess the  
34  
35 333 among groups differences of continuous, normally distributed and homoscedastic data; the Kruskal  
36  
37  
38 334 Wallis, test followed by the Mann Whitney test with the Bonferroni correction for multiple  
39  
40 335 comparison, is used otherwise. The Monte Carlo method is used to evaluate the non-parametric tests  
41  
42 336 in case of small size of the sub-groups. Pearson chi square exact test is performed to investigate  
43  
44  
45 337 relationships between grouping variables. The Spearman rank Correlation is used to assess  
46  
47 338 correlations between the numerical scores and continuous data. The General linear model, or the  
48  
49 339 Generalized linear model in case of not normal distribution, is used as multivariate analysis to  
50  
51 340 compare the group's outcomes corrected by the influencing factors. The Kaplan Meyer analysis is  
52  
53  
54 341 performed to assess survival to major adverse events. For all tests  $p < 0.05$  is considered significant.  
55  
56 342 SPSS version 19.0 (IBM Corp., Armonk, NY, USA) is applied for the analyses.

57  
58 343

59  
60 344 *Data monitoring*



1  
2  
3 345 A central project data manager is tasked to perform data quality control on all collected data. An  
4  
5 346 interim report and a final report are foreseen, to be submitted to the Ministry of Health who funded  
6  
7  
8 347 the project. The monitoring personnel belongs to a research structure of the Scientific Direction of  
9  
10 348 the Institution, the Applied and Translational Research Center, and it is independent from the Clinic  
11  
12 349 and the medical personnel performing the study procedures. A further project auditing is performed  
13  
14  
15 350 by another independent entity of the Institution, the Clinical Trial Center. The final study report is  
16  
17 351 also sent to the Ethic Committee.

## 21 353 **ETHICS AND DISSEMINATION**

### 23 354 *Research ethics approval*

25  
26 355 Ethical approval was obtained on 5 May 2018 from the central Emilia Wide Area Ethical  
27  
28 356 Committee of the Emilia-Romagna Region (CE-AVEC) settled at the University General Hospital  
29  
30 357 Sant'Orsola-Malpighi of Bologna.

### 35 359 *Protocol amendments*

37 360 Minor protocol amendments, for example, database production changes to facilitate monitoring  
38  
39  
40 361 processes or improve outcome assessment by questionnaire, are fully documented. In case of major  
41  
42 362 amendments, for example, changes to the patient information sheet and consent form, change of a  
43  
44 363 local project leader or the inclusion of a new project site, they are submitted for approval by the  
45  
46  
47 364 lead Ethics Committee as required.

### 51 366 *Consent or assent*

53 367 All participants will provide informed written consent in Italian and they may dropout the trial at  
54  
55  
56 368 any time during the study course.

### 58 369 *Confidentiality*



1  
2  
3 370 Data are recorded using case report forms and processed centrally at the Rizzoli Orthopedics  
4  
5 371 Institute, Bologna, Italy. The hard copies of case report forms are stored in a locked area with  
6  
7  
8 372 secured and restricted access. The electronic data are stored on password protected servers with  
9  
10 373 restricted access. All data collected are kept strictly confidential. Daily backups of all electronic  
11  
12 374 data occur to minimize any risk of lost data. After study completion, paper copies of data are  
13  
14  
15 375 archived in secure storage. Identifiers are be removed in case follow-up of study patients is  
16  
17 376 necessary; however, electronic data continue to be kept in a secure electronic database. This  
18  
19 377 remains password protected and with access given only to the study investigators unless otherwise  
20  
21  
22 378 authorized by the study team.

23  
24 379  
25  
26 380 *Access to data*

27  
28 381 Only members of the research team who need to contact study patients, enter data, or perform data  
29  
30 382 quality control have access to patient information.

31  
32  
33 383  
34  
35 384 *Dissemination policy*

36  
37 385 This trial is produced according to the SPIRIT (Standard Protocol Items: Recommendations for  
38  
39  
40 386 Interventional Trials) international standards. Results are disseminated through peer-reviewed  
41  
42 387 publications and will be submitted for presentation at national and international conferences. The  
43  
44  
45 388 authorship is based on International Committee of Medical Journal Editors 2018 Recommendations.

46  
47 389  
48  
49 390 *Scientific relevance and broader impact*

50  
51 391 This study provides a detailed method of treatment for knee OA and can offer clear indications on  
52  
53  
54 392 the potential and limitations of the combined use of intra-articular and subchondral bone injections  
55  
56 393 of BMAC. The BMAC analysis provides characterisation of this product to shed greater light on the  
57  
58 394 properties ensuring its effectiveness. Baseline patient-related and disease-related factors analysis

59  
60

1  
2  
3 395 can allow to better define those characteristics that make different subjects more or less responsive  
4  
5 396 to this type of treatment.

7  
8 397  
9  
10 398 *Contributorship statement*

11  
12 399 ADM is the principal investigator of this study. SS, LA, AB, DR wrote the manuscript and will  
13  
14 400 conduct the trial. GV and MM are responsible of imaging evaluation. CC and BG are involved in  
15  
16  
17 401 products and patients' characterization. ADM, SZ and GF applied for funding and supervise the  
18  
19 402 trial. All authors read and approved the final protocol.

21  
22 403  
23  
24 404 *Competing interest*

25  
26 405 SZ reports non-financial support from personal fees from I+SRL, grants from FidiaFarmaceutici  
27  
28 406 S.p.A., Cartiheal Ltd, IGEA clinical biophysics, BIOMET, and Kensey Nash, outside the submitted  
29  
30  
31 407 work. The funders had no role in the design of the study, in the collection, analyses, or  
32  
33 408 interpretation of data, in the writing of the manuscript, or in the decision to publish the results. The  
34  
35 409 principal investigator and other authors declare no financial and other competing interests.

37  
38 410  
39  
40 411 *Funding*

41  
42 412 The study is funded by Italian Health Ministry in the Project "Giovane Ricercatore" (GR-2016-  
43  
44 413 02361990).

46  
47 414  
48  
49 415 *Data sharing statement*

50  
51 416 No data are available

1  
2  
3  
4  
5  
6  
7  
8  
9  
10  
11  
12  
13  
14  
15  
16  
17  
18  
19  
20  
21  
22  
23  
24  
25  
26  
27  
28  
29  
30  
31  
32  
33  
34  
35  
36  
37  
38  
39  
40  
41  
42  
43  
44  
45  
46  
47  
48  
49  
50  
51  
52  
53  
54  
55  
56  
57  
58  
59  
60**REFERENCES**

1. Mobasher A, Batt M. An update on the pathophysiology of osteoarthritis. *Ann Phys Rehabil Med*. 2016 Dec;59(5-6):333-339.
2. Donell S. Subchondral bone remodelling in osteoarthritis. *EFORT Open Rev*. 2019 Jun 3;4(6):221-229.
3. Bitton R. The economic burden of osteoarthritis. *Am J Manag Care*. 2009 Sep;15(8 Suppl):S230-5.
4. Delanois RE, Mistry JB, Gwam CU, et al. Current Epidemiology of Revision Total Knee Arthroplasty in the United States. *J Arthroplasty*. 2017 Sep;32(9):2663-2668.
5. Filardo G, Kon E, Longo UG, et al. Non-surgical treatments for the management of early osteoarthritis. *Knee Surg Sports Traumatol Arthrosc*. 2016 Jun;24(6):1775-85.
6. Cavallo C, Boffa A, Andriolo L, et al. Bone marrow concentrate injections for the treatment of osteoarthritis: evidence from preclinical findings to the clinical application. *Int Orthop*. 2021 Feb;45(2):525-538.
7. Hernigou P, Auregan JC, Dubory A, et al. Subchondral stem cell therapy versus contralateral total knee arthroplasty for osteoarthritis following secondary osteonecrosis of the knee. *Int Orthop*. 2018 Nov;42(11):2563-2571.
8. Singh V, Oliashirazi A, Tan T, et al. Clinical and Pathophysiologic Significance of MRI Identified Bone Marrow Lesions Associated with Knee Osteoarthritis. *Arch Bone Jt Surg*. 2019 May;7(3):211-219.
9. Yusup A, Kaneko H, Liu L, et al. Bone marrow lesions, subchondral bone cysts and subchondral bone attrition are associated with histological synovitis in patients with end-stage knee osteoarthritis: a cross-sectional study. *Osteoarthritis Cartilage*. 2015;23(11):1858-1864.

- 1  
2  
3 446 10. Hernigou, Jacques et al. "Role of Scaffolds, Subchondral, Intra-Articular Injections of Fresh  
4  
5 447 Autologous Bone Marrow Concentrate Regenerative Cells in Treating Human Knee  
6  
7  
8 448 Cartilage Lesions: Different Approaches and Different Results." *International journal of*  
9  
10 449 *molecular sciences* vol. 22,8 3844.
- 11  
12 450 11. Hernigou, Philippe et al. "Subchondral bone or intra-articular injection of bone marrow  
13  
14 451 concentrate mesenchymal stem cells in bilateral knee osteoarthritis: what better postpone  
15  
16  
17 452 knee arthroplasty at fifteen years? A randomized study." *International orthopaedics* vol.  
18  
19 453 45,2 (2021): 391-399.
- 20  
21 454 12. Kon E, Boffa A, Andriolo L, et al. Subchondral and intra-articular injections of bone  
22  
23  
24 455 marrow concentrate are a safe and effective treatment for knee osteoarthritis: a prospective,  
25  
26 456 multi-center pilot study. *Knee Surg Sports Traumatol Arthrosc.* 2021;29(12):4232-4240
- 27  
28 457 13. Chan AW, Tetzlaff JM, Gøtzsche PC, et al. SPIRIT 2013 explanation and elaboration:  
29  
30  
31 458 guidance for protocols of clinical trials. *BMJ.* 2013 346:e7586
- 32  
33 459 14. Fazeli, Mir Sohail et al. "Intra-articular placebo effect in the treatment of knee osteoarthritis:  
34  
35 460 a survey of the current clinical evidence." *Therapeutic advances in musculoskeletal*  
36  
37 461 *disease* vol. 14 1759720X211066689. 31 Jan. 2022, doi:10.1177/1759720X211066689

## 42 463 **FIGURE LEGEND**

43  
44 464 Figure 1 - Anterior iliac crest trocar insertion (A); Bone Marrow (BM) harvesting (B); BM filtration  
45  
46  
47 465 (C); BM concentration (D); Trocar positioning under fluoroscopic control (E); Intra-articular and  
48  
49 466 subchondral Bone Marrow Aspirate Concentrate injections (F).

50  
51  
52  
53  
54  
55  
56  
57  
58  
59  
60

1  
2  
3  
4  
5  
6  
7  
8  
9  
10  
11  
12  
13  
14  
15  
16  
17  
18  
19  
20  
21  
22  
23  
24  
25  
26  
27  
28  
29  
30  
31  
32  
33  
34  
35  
36  
37  
38  
39  
40  
41  
42  
43  
44  
45  
46  
47  
48  
49  
50  
51  
52  
53  
54  
55  
56  
57  
58  
59  
60

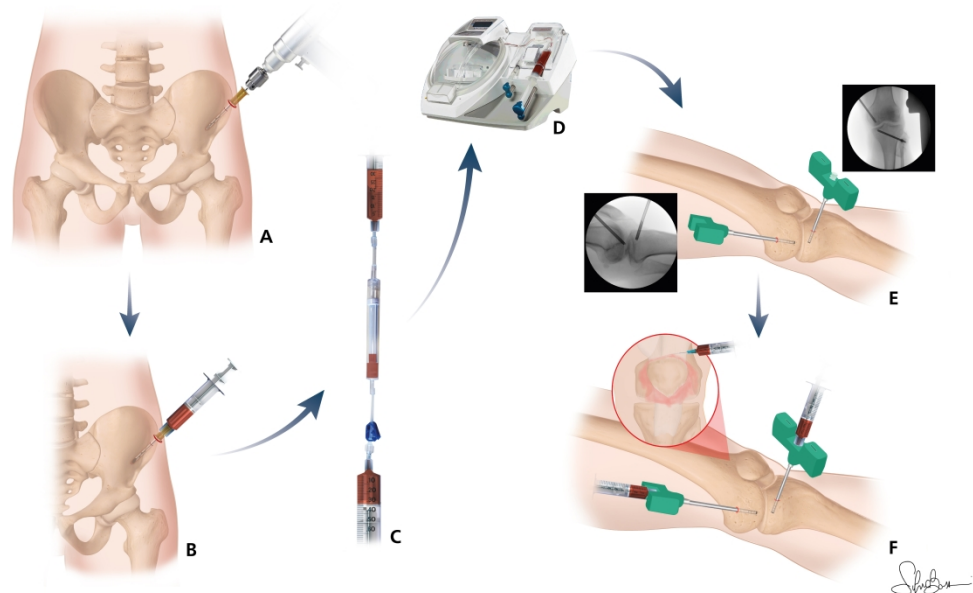

Figure 1: Anterior iliac crest trocar insertion (A); Bone Marrow (BM) harvesting (B); BM filtration (C); BM concentration (D); Trocar positioning under fluoroscopic control (E); Intra-articular and subchondral Bone Marrow Aspirate Concentrate injections (F).

422x279mm (300 x 300 DPI)

# Reporting checklist for protocol of a clinical trial.

Based on the SPIRIT guidelines.

## Instructions to authors

Complete this checklist by entering the page numbers from your manuscript where readers will find each of the items listed below.

Your article may not currently address all the items on the checklist. Please modify your text to include the missing information. If you are certain that an item does not apply, please write "n/a" and provide a short explanation.

Upload your completed checklist as an extra file when you submit to a journal.

In your methods section, say that you used the SPIRIT reporting guidelines, and cite them as:

Chan A-W, Tetzlaff JM, Gøtzsche PC, Altman DG, Mann H, Berlin J, Dickersin K, Hróbjartsson A, Schulz KF, Parulekar WR, Krleža-Jerić K, Laupacis A, Moher D. SPIRIT 2013 Explanation and Elaboration: Guidance for protocols of clinical trials. *BMJ*. 2013;346:e7586

|                                   |                     |                                                                                                              | Page   |
|-----------------------------------|---------------------|--------------------------------------------------------------------------------------------------------------|--------|
|                                   |                     | Reporting Item                                                                                               | Number |
| <b>Administrative information</b> |                     |                                                                                                              |        |
| Title                             | <a href="#">#1</a>  | Descriptive title identifying the study design, population, interventions, and, if applicable, trial acronym | 1      |
| Trial registration                | <a href="#">#2a</a> | Trial identifier and registry name. If not yet registered,                                                   | 1      |

|    |                          |                                                                                  |    |
|----|--------------------------|----------------------------------------------------------------------------------|----|
| 1  |                          | name of intended registry                                                        |    |
| 2  |                          |                                                                                  |    |
| 3  |                          |                                                                                  |    |
| 4  | Trial registration: data | <a href="#">#2b</a> All items from the World Health Organization Trial           | 1  |
| 5  |                          |                                                                                  |    |
| 6  | set                      | Registration Data Set                                                            |    |
| 7  |                          |                                                                                  |    |
| 8  |                          |                                                                                  |    |
| 9  | Protocol version         | <a href="#">#3</a> Date and version identifier                                   | 3  |
| 10 |                          |                                                                                  |    |
| 11 |                          |                                                                                  |    |
| 12 | Funding                  | <a href="#">#4</a> Sources and types of financial, material, and other support   | 17 |
| 13 |                          |                                                                                  |    |
| 14 |                          |                                                                                  |    |
| 15 | Roles and                | <a href="#">#5a</a> Names, affiliations, and roles of protocol contributors      | 4  |
| 16 |                          |                                                                                  |    |
| 17 | responsibilities:        |                                                                                  |    |
| 18 |                          |                                                                                  |    |
| 19 | contributorship          |                                                                                  |    |
| 20 |                          |                                                                                  |    |
| 21 |                          |                                                                                  |    |
| 22 |                          |                                                                                  |    |
| 23 | Roles and                | <a href="#">#5b</a> Name and contact information for the trial sponsor           | 1  |
| 24 |                          |                                                                                  |    |
| 25 | responsibilities:        |                                                                                  |    |
| 26 |                          |                                                                                  |    |
| 27 | sponsor contact          |                                                                                  |    |
| 28 |                          |                                                                                  |    |
| 29 | information              |                                                                                  |    |
| 30 |                          |                                                                                  |    |
| 31 |                          |                                                                                  |    |
| 32 |                          |                                                                                  |    |
| 33 | Roles and                | <a href="#">#5c</a> Role of study sponsor and funders, if any, in study design;  | 1  |
| 34 |                          |                                                                                  |    |
| 35 | responsibilities:        | collection, management, analysis, and interpretation of                          |    |
| 36 |                          |                                                                                  |    |
| 37 | sponsor and funder       | data; writing of the report; and the decision to submit the                      |    |
| 38 |                          |                                                                                  |    |
| 39 |                          | report for publication, including whether they will have                         |    |
| 40 |                          |                                                                                  |    |
| 41 |                          | ultimate authority over any of these activities                                  |    |
| 42 |                          |                                                                                  |    |
| 43 |                          |                                                                                  |    |
| 44 |                          |                                                                                  |    |
| 45 | Roles and                | <a href="#">#5d</a> Composition, roles, and responsibilities of the coordinating | 1  |
| 46 |                          |                                                                                  |    |
| 47 | responsibilities:        | centre, steering committee, endpoint adjudication                                |    |
| 48 |                          |                                                                                  |    |
| 49 | committees               | committee, data management team, and other individuals                           |    |
| 50 |                          |                                                                                  |    |
| 51 |                          | or groups overseeing the trial, if applicable (see Item 21a                      |    |
| 52 |                          |                                                                                  |    |
| 53 |                          | for data monitoring committee)                                                   |    |
| 54 |                          |                                                                                  |    |
| 55 |                          |                                                                                  |    |
| 56 |                          |                                                                                  |    |
| 57 | <b>Introduction</b>      |                                                                                  |    |
| 58 |                          |                                                                                  |    |
| 59 |                          |                                                                                  |    |
| 60 |                          |                                                                                  |    |

|    |                           |                     |                                                                   |   |
|----|---------------------------|---------------------|-------------------------------------------------------------------|---|
| 1  | Background and            | <a href="#">#6a</a> | Description of research question and justification for            | 5 |
| 2  |                           |                     |                                                                   |   |
| 3  | rationale                 |                     | undertaking the trial, including summary of relevant studies      |   |
| 4  |                           |                     | (published and unpublished) examining benefits and harms          |   |
| 5  |                           |                     | for each intervention                                             |   |
| 6  |                           |                     |                                                                   |   |
| 7  |                           |                     |                                                                   |   |
| 8  |                           |                     |                                                                   |   |
| 9  |                           |                     |                                                                   |   |
| 10 |                           |                     |                                                                   |   |
| 11 | Background and            | <a href="#">#6b</a> | Explanation for choice of comparators                             | 5 |
| 12 |                           |                     |                                                                   |   |
| 13 | rationale: choice of      |                     |                                                                   |   |
| 14 |                           |                     |                                                                   |   |
| 15 | comparators               |                     |                                                                   |   |
| 16 |                           |                     |                                                                   |   |
| 17 |                           |                     |                                                                   |   |
| 18 | Objectives                | <a href="#">#7</a>  | Specific objectives or hypotheses                                 | 6 |
| 19 |                           |                     |                                                                   |   |
| 20 |                           |                     |                                                                   |   |
| 21 |                           |                     |                                                                   |   |
| 22 | Trial design              | <a href="#">#8</a>  | Description of trial design including type of trial (eg, parallel | 6 |
| 23 |                           |                     | group, crossover, factorial, single group), allocation ratio,     |   |
| 24 |                           |                     | and framework (eg, superiority, equivalence, non-inferiority,     |   |
| 25 |                           |                     | exploratory)                                                      |   |
| 26 |                           |                     |                                                                   |   |
| 27 |                           |                     |                                                                   |   |
| 28 |                           |                     |                                                                   |   |
| 29 |                           |                     |                                                                   |   |
| 30 |                           |                     |                                                                   |   |
| 31 | <b>Methods:</b>           |                     |                                                                   |   |
| 32 |                           |                     |                                                                   |   |
| 33 | <b>Participants,</b>      |                     |                                                                   |   |
| 34 |                           |                     |                                                                   |   |
| 35 | <b>interventions, and</b> |                     |                                                                   |   |
| 36 |                           |                     |                                                                   |   |
| 37 | <b>outcomes</b>           |                     |                                                                   |   |
| 38 |                           |                     |                                                                   |   |
| 39 |                           |                     |                                                                   |   |
| 40 |                           |                     |                                                                   |   |
| 41 | Study setting             | <a href="#">#9</a>  | Description of study settings (eg, community clinic,              | 6 |
| 42 |                           |                     | academic hospital) and list of countries where data will be       |   |
| 43 |                           |                     | collected. Reference to where list of study sites can be          |   |
| 44 |                           |                     | obtained                                                          |   |
| 45 |                           |                     |                                                                   |   |
| 46 |                           |                     |                                                                   |   |
| 47 |                           |                     |                                                                   |   |
| 48 |                           |                     |                                                                   |   |
| 49 |                           |                     |                                                                   |   |
| 50 |                           |                     |                                                                   |   |
| 51 | Eligibility criteria      | <a href="#">#10</a> | Inclusion and exclusion criteria for participants. If             | 7 |
| 52 |                           |                     | applicable, eligibility criteria for study centres and            |   |
| 53 |                           |                     | individuals who will perform the interventions (eg,               |   |
| 54 |                           |                     |                                                                   |   |
| 55 |                           |                     |                                                                   |   |
| 56 |                           |                     |                                                                   |   |
| 57 |                           |                     |                                                                   |   |
| 58 |                           |                     |                                                                   |   |
| 59 |                           |                     |                                                                   |   |
| 60 |                           |                     |                                                                   |   |



|    |                      |                                                                                   |    |
|----|----------------------|-----------------------------------------------------------------------------------|----|
| 1  |                      | surgeons, psychotherapists)                                                       |    |
| 2  |                      |                                                                                   |    |
| 3  |                      |                                                                                   |    |
| 4  | Interventions:       | <a href="#">#11a</a> Interventions for each group with sufficient detail to allow | 7  |
| 5  |                      |                                                                                   |    |
| 6  | description          | replication, including how and when they will be                                  |    |
| 7  |                      |                                                                                   |    |
| 8  |                      | administered                                                                      |    |
| 9  |                      |                                                                                   |    |
| 10 |                      |                                                                                   |    |
| 11 | Interventions:       | <a href="#">#11b</a> Criteria for discontinuing or modifying allocated            | 7  |
| 12 |                      |                                                                                   |    |
| 13 | modifications        | interventions for a given trial participant (eg, drug dose                        |    |
| 14 |                      |                                                                                   |    |
| 15 |                      | change in response to harms, participant request, or                              |    |
| 16 |                      |                                                                                   |    |
| 17 |                      | improving / worsening disease)                                                    |    |
| 18 |                      |                                                                                   |    |
| 19 |                      |                                                                                   |    |
| 20 |                      |                                                                                   |    |
| 21 | Interventions:       | <a href="#">#11c</a> Strategies to improve adherence to intervention protocols,   | 9  |
| 22 |                      |                                                                                   |    |
| 23 | adherence            | and any procedures for monitoring adherence (eg, drug                             |    |
| 24 |                      |                                                                                   |    |
| 25 |                      | tablet return; laboratory tests)                                                  |    |
| 26 |                      |                                                                                   |    |
| 27 |                      |                                                                                   |    |
| 28 |                      |                                                                                   |    |
| 29 | Interventions:       | <a href="#">#11d</a> Relevant concomitant care and interventions that are         | 9  |
| 30 |                      |                                                                                   |    |
| 31 | concomitant care     | permitted or prohibited during the trial                                          |    |
| 32 |                      |                                                                                   |    |
| 33 |                      |                                                                                   |    |
| 34 | Outcomes             | <a href="#">#12</a> Primary, secondary, and other outcomes, including the         | 9  |
| 35 |                      |                                                                                   |    |
| 36 |                      | specific measurement variable (eg, systolic blood                                 |    |
| 37 |                      |                                                                                   |    |
| 38 |                      | pressure), analysis metric (eg, change from baseline, final                       |    |
| 39 |                      |                                                                                   |    |
| 40 |                      | value, time to event), method of aggregation (eg, median,                         |    |
| 41 |                      |                                                                                   |    |
| 42 |                      | proportion), and time point for each outcome. Explanation                         |    |
| 43 |                      |                                                                                   |    |
| 44 |                      | of the clinical relevance of chosen efficacy and harm                             |    |
| 45 |                      |                                                                                   |    |
| 46 |                      | outcomes is strongly recommended                                                  |    |
| 47 |                      |                                                                                   |    |
| 48 |                      |                                                                                   |    |
| 49 |                      |                                                                                   |    |
| 50 |                      |                                                                                   |    |
| 51 | Participant timeline | <a href="#">#13</a> Time schedule of enrolment, interventions (including any      | 10 |
| 52 |                      |                                                                                   |    |
| 53 |                      | run-ins and washouts), assessments, and visits for                                |    |
| 54 |                      |                                                                                   |    |
| 55 |                      | participants. A schematic diagram is highly recommended                           |    |
| 56 |                      |                                                                                   |    |
| 57 |                      | (see Figure)                                                                      |    |
| 58 |                      |                                                                                   |    |
| 59 |                      |                                                                                   |    |
| 60 |                      |                                                                                   |    |

|    |                              |                      |                                                              |    |
|----|------------------------------|----------------------|--------------------------------------------------------------|----|
| 1  | Sample size                  | <a href="#">#14</a>  | Estimated number of participants needed to achieve study     | 13 |
| 2  |                              |                      | objectives and how it was determined, including clinical and |    |
| 3  |                              |                      | statistical assumptions supporting any sample size           |    |
| 4  |                              |                      | calculations                                                 |    |
| 5  |                              |                      |                                                              |    |
| 6  |                              |                      |                                                              |    |
| 7  |                              |                      |                                                              |    |
| 8  |                              |                      |                                                              |    |
| 9  |                              |                      |                                                              |    |
| 10 |                              |                      |                                                              |    |
| 11 | Recruitment                  | <a href="#">#15</a>  | Strategies for achieving adequate participant enrolment to   | 11 |
| 12 |                              |                      | reach target sample size                                     |    |
| 13 |                              |                      |                                                              |    |
| 14 |                              |                      |                                                              |    |
| 15 |                              |                      |                                                              |    |
| 16 | <b>Methods: Assignment</b>   |                      |                                                              |    |
| 17 | <b>of interventions (for</b> |                      |                                                              |    |
| 18 | <b>controlled trials)</b>    |                      |                                                              |    |
| 19 |                              |                      |                                                              |    |
| 20 |                              |                      |                                                              |    |
| 21 |                              |                      |                                                              |    |
| 22 |                              |                      |                                                              |    |
| 23 |                              |                      |                                                              |    |
| 24 | Allocation: sequence         | <a href="#">#16a</a> | Method of generating the allocation sequence (eg,            | 12 |
| 25 | generation                   |                      | computer-generated random numbers), and list of any          |    |
| 26 |                              |                      | factors for stratification. To reduce predictability of a    |    |
| 27 |                              |                      | random sequence, details of any planned restriction (eg,     |    |
| 28 |                              |                      | blocking) should be provided in a separate document that is  |    |
| 29 |                              |                      | unavailable to those who enrol participants or assign        |    |
| 30 |                              |                      | interventions                                                |    |
| 31 |                              |                      |                                                              |    |
| 32 |                              |                      |                                                              |    |
| 33 |                              |                      |                                                              |    |
| 34 |                              |                      |                                                              |    |
| 35 |                              |                      |                                                              |    |
| 36 |                              |                      |                                                              |    |
| 37 |                              |                      |                                                              |    |
| 38 |                              |                      |                                                              |    |
| 39 |                              |                      |                                                              |    |
| 40 |                              |                      |                                                              |    |
| 41 | Allocation                   | <a href="#">#16b</a> | Mechanism of implementing the allocation sequence (eg,       | 12 |
| 42 | concealment                  |                      | central telephone; sequentially numbered, opaque, sealed     |    |
| 43 | mechanism                    |                      | envelopes), describing any steps to conceal the sequence     |    |
| 44 |                              |                      | until interventions are assigned                             |    |
| 45 |                              |                      |                                                              |    |
| 46 |                              |                      |                                                              |    |
| 47 |                              |                      |                                                              |    |
| 48 |                              |                      |                                                              |    |
| 49 |                              |                      |                                                              |    |
| 50 |                              |                      |                                                              |    |
| 51 | Allocation:                  | <a href="#">#16c</a> | Who will generate the allocation sequence, who will enrol    | 13 |
| 52 | implementation               |                      | participants, and who will assign participants to            |    |
| 53 |                              |                      | interventions                                                |    |
| 54 |                              |                      |                                                              |    |
| 55 |                              |                      |                                                              |    |
| 56 |                              |                      |                                                              |    |
| 57 |                              |                      |                                                              |    |
| 58 |                              |                      |                                                              |    |
| 59 |                              |                      |                                                              |    |
| 60 |                              |                      |                                                              |    |

|    |                        |                      |                                                                |    |
|----|------------------------|----------------------|----------------------------------------------------------------|----|
| 1  | Blinding (masking)     | <a href="#">#17a</a> | Who will be blinded after assignment to interventions (eg,     | 11 |
| 2  |                        |                      | trial participants, care providers, outcome assessors, data    |    |
| 3  |                        |                      | analysts), and how                                             |    |
| 4  |                        |                      |                                                                |    |
| 5  |                        |                      |                                                                |    |
| 6  |                        |                      |                                                                |    |
| 7  |                        |                      |                                                                |    |
| 8  | Blinding (masking):    | <a href="#">#17b</a> | If blinded, circumstances under which unblinding is            | 11 |
| 9  | emergency              |                      | permissible, and procedure for revealing a participant's       |    |
| 10 |                        |                      | allocated intervention during the trial                        |    |
| 11 | unblinding             |                      |                                                                |    |
| 12 |                        |                      |                                                                |    |
| 13 |                        |                      |                                                                |    |
| 14 |                        |                      |                                                                |    |
| 15 |                        |                      |                                                                |    |
| 16 | <b>Methods: Data</b>   |                      |                                                                |    |
| 17 | <b>collection,</b>     |                      |                                                                |    |
| 18 | <b>management, and</b> |                      |                                                                |    |
| 19 | <b>analysis</b>        |                      |                                                                |    |
| 20 |                        |                      |                                                                |    |
| 21 |                        |                      |                                                                |    |
| 22 |                        |                      |                                                                |    |
| 23 |                        |                      |                                                                |    |
| 24 |                        |                      |                                                                |    |
| 25 |                        |                      |                                                                |    |
| 26 | Data collection plan   | <a href="#">#18a</a> | Plans for assessment and collection of outcome, baseline,      | 13 |
| 27 |                        |                      | and other trial data, including any related processes to       |    |
| 28 |                        |                      | promote data quality (eg, duplicate measurements, training     |    |
| 29 |                        |                      | of assessors) and a description of study instruments (eg,      |    |
| 30 |                        |                      | questionnaires, laboratory tests) along with their reliability |    |
| 31 |                        |                      | and validity, if known. Reference to where data collection     |    |
| 32 |                        |                      | forms can be found, if not in the protocol                     |    |
| 33 |                        |                      |                                                                |    |
| 34 |                        |                      |                                                                |    |
| 35 |                        |                      |                                                                |    |
| 36 |                        |                      |                                                                |    |
| 37 |                        |                      |                                                                |    |
| 38 |                        |                      |                                                                |    |
| 39 |                        |                      |                                                                |    |
| 40 |                        |                      |                                                                |    |
| 41 |                        |                      |                                                                |    |
| 42 |                        |                      |                                                                |    |
| 43 | Data collection plan:  | <a href="#">#18b</a> | Plans to promote participant retention and complete follow-    | 13 |
| 44 | retention              |                      | up, including list of any outcome data to be collected for     |    |
| 45 |                        |                      | participants who discontinue or deviate from intervention      |    |
| 46 |                        |                      | protocols                                                      |    |
| 47 |                        |                      |                                                                |    |
| 48 |                        |                      |                                                                |    |
| 49 |                        |                      |                                                                |    |
| 50 |                        |                      |                                                                |    |
| 51 |                        |                      |                                                                |    |
| 52 |                        |                      |                                                                |    |
| 53 | Data management        | <a href="#">#19</a>  | Plans for data entry, coding, security, and storage,           | 13 |
| 54 |                        |                      | including any related processes to promote data quality        |    |
| 55 |                        |                      | (eg, double data entry; range checks for data values).         |    |
| 56 |                        |                      |                                                                |    |
| 57 |                        |                      |                                                                |    |
| 58 |                        |                      |                                                                |    |
| 59 |                        |                      |                                                                |    |
| 60 |                        |                      |                                                                |    |

|    |                            |                                                                                  |    |
|----|----------------------------|----------------------------------------------------------------------------------|----|
| 1  |                            | Reference to where details of data management                                    |    |
| 2  |                            |                                                                                  |    |
| 3  |                            | procedures can be found, if not in the protocol                                  |    |
| 4  |                            |                                                                                  |    |
| 5  |                            |                                                                                  |    |
| 6  | Statistics: outcomes       | <a href="#">#20a</a> Statistical methods for analysing primary and secondary     | 13 |
| 7  |                            |                                                                                  |    |
| 8  |                            | outcomes. Reference to where other details of the                                |    |
| 9  |                            |                                                                                  |    |
| 10 |                            | statistical analysis plan can be found, if not in the protocol                   |    |
| 11 |                            |                                                                                  |    |
| 12 |                            |                                                                                  |    |
| 13 | Statistics: additional     | <a href="#">#20b</a> Methods for any additional analyses (eg, subgroup and       | 13 |
| 14 |                            |                                                                                  |    |
| 15 | analyses                   | adjusted analyses)                                                               |    |
| 16 |                            |                                                                                  |    |
| 17 |                            |                                                                                  |    |
| 18 | Statistics: analysis       | <a href="#">#20c</a> Definition of analysis population relating to protocol non- | 13 |
| 19 |                            |                                                                                  |    |
| 20 | population and             | adherence (eg, as randomised analysis), and any statistical                      |    |
| 21 |                            |                                                                                  |    |
| 22 | missing data               | methods to handle missing data (eg, multiple imputation)                         |    |
| 23 |                            |                                                                                  |    |
| 24 |                            |                                                                                  |    |
| 25 |                            |                                                                                  |    |
| 26 | <b>Methods: Monitoring</b> |                                                                                  |    |
| 27 |                            |                                                                                  |    |
| 28 |                            |                                                                                  |    |
| 29 | Data monitoring:           | <a href="#">#21a</a> Composition of data monitoring committee (DMC);             | 15 |
| 30 |                            |                                                                                  |    |
| 31 | formal committee           | summary of its role and reporting structure; statement of                        |    |
| 32 |                            |                                                                                  |    |
| 33 |                            | whether it is independent from the sponsor and competing                         |    |
| 34 |                            |                                                                                  |    |
| 35 |                            | interests; and reference to where further details about its                      |    |
| 36 |                            |                                                                                  |    |
| 37 |                            | charter can be found, if not in the protocol. Alternatively, an                  |    |
| 38 |                            |                                                                                  |    |
| 39 |                            | explanation of why a DMC is not needed                                           |    |
| 40 |                            |                                                                                  |    |
| 41 |                            |                                                                                  |    |
| 42 |                            |                                                                                  |    |
| 43 |                            |                                                                                  |    |
| 44 | Data monitoring:           | <a href="#">#21b</a> Description of any interim analyses and stopping            | 15 |
| 45 |                            |                                                                                  |    |
| 46 | interim analysis           | guidelines, including who will have access to these interim                      |    |
| 47 |                            |                                                                                  |    |
| 48 |                            | results and make the final decision to terminate the trial                       |    |
| 49 |                            |                                                                                  |    |
| 50 |                            |                                                                                  |    |
| 51 | Harms                      | <a href="#">#22</a> Plans for collecting, assessing, reporting, and managing     | 12 |
| 52 |                            |                                                                                  |    |
| 53 |                            | solicited and spontaneously reported adverse events and                          |    |
| 54 |                            |                                                                                  |    |
| 55 |                            | other unintended effects of trial interventions or trial                         |    |
| 56 |                            |                                                                                  |    |
| 57 |                            |                                                                                  |    |
| 58 |                            |                                                                                  |    |
| 59 |                            |                                                                                  |    |
| 60 |                            |                                                                                  |    |

|    |                      |                                                                                  |     |
|----|----------------------|----------------------------------------------------------------------------------|-----|
| 1  |                      | conduct                                                                          |     |
| 2  |                      |                                                                                  |     |
| 3  |                      |                                                                                  |     |
| 4  | Auditing             | <a href="#">#23</a> Frequency and procedures for auditing trial conduct, if any, | 14  |
| 5  |                      |                                                                                  |     |
| 6  |                      | and whether the process will be independent from                                 |     |
| 7  |                      |                                                                                  |     |
| 8  |                      | investigators and the sponsor                                                    |     |
| 9  |                      |                                                                                  |     |
| 10 |                      |                                                                                  |     |
| 11 | <b>Ethics and</b>    |                                                                                  |     |
| 12 |                      |                                                                                  |     |
| 13 | <b>dissemination</b> |                                                                                  |     |
| 14 |                      |                                                                                  |     |
| 15 |                      |                                                                                  |     |
| 16 | Research ethics      | <a href="#">#24</a> Plans for seeking research ethics committee / institutional  | 15  |
| 17 |                      |                                                                                  |     |
| 18 | approval             | review board (REC / IRB) approval                                                |     |
| 19 |                      |                                                                                  |     |
| 20 |                      |                                                                                  |     |
| 21 |                      |                                                                                  |     |
| 22 | Protocol             | <a href="#">#25</a> Plans for communicating important protocol modifications     | 15  |
| 23 |                      |                                                                                  |     |
| 24 | amendments           | (eg, changes to eligibility criteria, outcomes, analyses) to                     |     |
| 25 |                      |                                                                                  |     |
| 26 |                      | relevant parties (eg, investigators, REC / IRBs, trial                           |     |
| 27 |                      |                                                                                  |     |
| 28 |                      | participants, trial registries, journals, regulators)                            |     |
| 29 |                      |                                                                                  |     |
| 30 |                      |                                                                                  |     |
| 31 |                      |                                                                                  |     |
| 32 | Consent or assent    | <a href="#">#26a</a> Who will obtain informed consent or assent from potential   | 15  |
| 33 |                      |                                                                                  |     |
| 34 |                      | trial participants or authorised surrogates, and how (see                        |     |
| 35 |                      |                                                                                  |     |
| 36 |                      | Item 32)                                                                         |     |
| 37 |                      |                                                                                  |     |
| 38 |                      |                                                                                  |     |
| 39 | Consent or assent:   | <a href="#">#26b</a> Additional consent provisions for collection and use of     | n/a |
| 40 |                      |                                                                                  |     |
| 41 | ancillary studies    | participant data and biological specimens in ancillary                           |     |
| 42 |                      |                                                                                  |     |
| 43 |                      | studies, if applicable                                                           |     |
| 44 |                      |                                                                                  |     |
| 45 |                      |                                                                                  |     |
| 46 |                      |                                                                                  |     |
| 47 | Confidentiality      | <a href="#">#27</a> How personal information about potential and enrolled        | 16  |
| 48 |                      |                                                                                  |     |
| 49 |                      | participants will be collected, shared, and maintained in                        |     |
| 50 |                      |                                                                                  |     |
| 51 |                      | order to protect confidentiality before, during, and after the                   |     |
| 52 |                      |                                                                                  |     |
| 53 |                      | trial                                                                            |     |
| 54 |                      |                                                                                  |     |
| 55 |                      |                                                                                  |     |
| 56 |                      |                                                                                  |     |
| 57 | Declaration of       | <a href="#">#28</a> Financial and other competing interests for principal        | 17  |
| 58 |                      |                                                                                  |     |
| 59 |                      |                                                                                  |     |
| 60 |                      |                                                                                  |     |

|    |                       |                      |                                                                 |     |
|----|-----------------------|----------------------|-----------------------------------------------------------------|-----|
| 1  | interests             |                      | investigators for the overall trial and each study site         |     |
| 2  |                       |                      |                                                                 |     |
| 3  |                       |                      |                                                                 |     |
| 4  | Data access           | <a href="#">#29</a>  | Statement of who will have access to the final trial dataset,   | 16  |
| 5  |                       |                      | and disclosure of contractual agreements that limit such        |     |
| 6  |                       |                      | access for investigators                                        |     |
| 7  |                       |                      |                                                                 |     |
| 8  |                       |                      |                                                                 |     |
| 9  |                       |                      |                                                                 |     |
| 10 |                       |                      |                                                                 |     |
| 11 | Ancillary and post    | <a href="#">#30</a>  | Provisions, if any, for ancillary and post-trial care, and for  | n/a |
| 12 |                       |                      | compensation to those who suffer harm from trial                |     |
| 13 | trial care            |                      | participation                                                   |     |
| 14 |                       |                      |                                                                 |     |
| 15 |                       |                      |                                                                 |     |
| 16 |                       |                      |                                                                 |     |
| 17 |                       |                      |                                                                 |     |
| 18 |                       |                      |                                                                 |     |
| 19 | Dissemination policy: | <a href="#">#31a</a> | Plans for investigators and sponsor to communicate trial        | 16  |
| 20 |                       |                      | results to participants, healthcare professionals, the public,  |     |
| 21 | trial results         |                      | and other relevant groups (eg, via publication, reporting in    |     |
| 22 |                       |                      | results databases, or other data sharing arrangements),         |     |
| 23 |                       |                      | including any publication restrictions                          |     |
| 24 |                       |                      |                                                                 |     |
| 25 |                       |                      |                                                                 |     |
| 26 |                       |                      |                                                                 |     |
| 27 |                       |                      |                                                                 |     |
| 28 |                       |                      |                                                                 |     |
| 29 |                       |                      |                                                                 |     |
| 30 |                       |                      |                                                                 |     |
| 31 | Dissemination policy: | <a href="#">#31b</a> | Authorship eligibility guidelines and any intended use of       | 16  |
| 32 |                       |                      | professional writers                                            |     |
| 33 | authorship            |                      |                                                                 |     |
| 34 |                       |                      |                                                                 |     |
| 35 |                       |                      |                                                                 |     |
| 36 | Dissemination policy: | <a href="#">#31c</a> | Plans, if any, for granting public access to the full protocol, | n/a |
| 37 |                       |                      | participant-level dataset, and statistical code                 |     |
| 38 | reproducible research |                      |                                                                 |     |
| 39 |                       |                      |                                                                 |     |
| 40 |                       |                      |                                                                 |     |
| 41 |                       |                      |                                                                 |     |
| 42 | <b>Appendices</b>     |                      |                                                                 |     |
| 43 |                       |                      |                                                                 |     |
| 44 |                       |                      |                                                                 |     |
| 45 | Informed consent      | <a href="#">#32</a>  | Model consent form and other related documentation given        | n/a |
| 46 |                       |                      | to participants and authorised surrogates                       |     |
| 47 | materials             |                      |                                                                 |     |
| 48 |                       |                      |                                                                 |     |
| 49 |                       |                      |                                                                 |     |
| 50 | Biological specimens  | <a href="#">#33</a>  | Plans for collection, laboratory evaluation, and storage of     | n/a |
| 51 |                       |                      | biological specimens for genetic or molecular analysis in       |     |
| 52 |                       |                      | the current trial and for future use in ancillary studies, if   |     |
| 53 |                       |                      | applicable                                                      |     |
| 54 |                       |                      |                                                                 |     |
| 55 |                       |                      |                                                                 |     |
| 56 |                       |                      |                                                                 |     |
| 57 |                       |                      |                                                                 |     |
| 58 |                       |                      |                                                                 |     |
| 59 |                       |                      |                                                                 |     |
| 60 |                       |                      |                                                                 |     |

1 The SPIRIT Explanation and Elaboration paper is distributed under the terms of the Creative  
2 Commons Attribution License CC-BY-NC. This checklist was completed on 04. March 2022 using  
3 <https://www.goodreports.org/>, a tool made by the [EQUATOR Network](#) in collaboration with  
4 [Penelope.ai](#)  
5  
6  
7  
8  
9  
10  
11  
12  
13  
14  
15  
16  
17  
18  
19  
20  
21  
22  
23  
24  
25  
26  
27  
28  
29  
30  
31  
32  
33  
34  
35  
36  
37  
38  
39  
40  
41  
42  
43  
44  
45  
46  
47  
48  
49  
50  
51  
52  
53  
54  
55  
56  
57  
58  
59  
60

# BMJ Open

**A prospective double-blind randomized controlled trial protocol comparing bone marrow aspirate concentrate intra-articular injection combined with subchondral injection versus intra-articular injection alone for the treatment of symptomatic knee osteoarthritis.**

|                                 |                                                                                                                                                                                                                                                                                                                                                                                                                                                                                                                                                                                                                                                                                                                                                                                                                                                                                                                                                                                                                                                                                                                                                                                      |
|---------------------------------|--------------------------------------------------------------------------------------------------------------------------------------------------------------------------------------------------------------------------------------------------------------------------------------------------------------------------------------------------------------------------------------------------------------------------------------------------------------------------------------------------------------------------------------------------------------------------------------------------------------------------------------------------------------------------------------------------------------------------------------------------------------------------------------------------------------------------------------------------------------------------------------------------------------------------------------------------------------------------------------------------------------------------------------------------------------------------------------------------------------------------------------------------------------------------------------|
| Journal:                        | <i>BMJ Open</i>                                                                                                                                                                                                                                                                                                                                                                                                                                                                                                                                                                                                                                                                                                                                                                                                                                                                                                                                                                                                                                                                                                                                                                      |
| Manuscript ID                   | bmjopen-2022-062632.R2                                                                                                                                                                                                                                                                                                                                                                                                                                                                                                                                                                                                                                                                                                                                                                                                                                                                                                                                                                                                                                                                                                                                                               |
| Article Type:                   | Protocol                                                                                                                                                                                                                                                                                                                                                                                                                                                                                                                                                                                                                                                                                                                                                                                                                                                                                                                                                                                                                                                                                                                                                                             |
| Date Submitted by the Author:   | 12-Aug-2022                                                                                                                                                                                                                                                                                                                                                                                                                                                                                                                                                                                                                                                                                                                                                                                                                                                                                                                                                                                                                                                                                                                                                                          |
| Complete List of Authors:       | Silva, Simone; IRCCS Istituto Ortopedico Rizzoli, II Orthopaedic and Traumatologic Clinic<br>Andriolo, Luca; IRCCS Istituto Ortopedico Rizzoli, II Orthopaedic and Traumatologic Clinic<br>Boffa, Angelo ; IRCCS Istituto Ortopedico Rizzoli, II Orthopaedic and Traumatologic Clinic<br>Di Martino, Alessandro; IRCCS Istituto Ortopedico Rizzoli, II Orthopaedic and Traumatologic Clinic<br>Reale, Davide; Istituto Ortopedico Rizzoli Istituto di Ricovero e Cura a Carattere Scientifico, II Orthopaedic and Traumatologic Clinic<br>Vara, Giulio; IRCCS Istituto Ortopedico Rizzoli, Diagnostic and Interventional Radiology<br>Marco, Miceli; IRCCS Istituto Ortopedico Rizzoli, Diagnostic and Interventional Radiology<br>Cavallo, Carola; IRCCS Istituto Ortopedico Rizzoli, Laboratory RAMSES, Research & Innovation Technology Department<br>Grigolo, Brunella; IRCCS Istituto Ortopedico Rizzoli, Laboratory RAMSES, Research & Innovation Technology Department<br>Zaffagnini, Stefano ; IRCCS Istituto Ortopedico Rizzoli, II Orthopaedic and Traumatologic Clinic<br>Filardo, Giuseppe; IRCCS Istituto Ortopedico Rizzoli, Applied and Translational Research Center |
| <b>Primary Subject Heading</b>: | Surgery                                                                                                                                                                                                                                                                                                                                                                                                                                                                                                                                                                                                                                                                                                                                                                                                                                                                                                                                                                                                                                                                                                                                                                              |
| Secondary Subject Heading:      | Evidence based practice                                                                                                                                                                                                                                                                                                                                                                                                                                                                                                                                                                                                                                                                                                                                                                                                                                                                                                                                                                                                                                                                                                                                                              |
| Keywords:                       | ORTHOPAEDIC & TRAUMA SURGERY, Adult orthopaedics < ORTHOPAEDIC & TRAUMA SURGERY, Orthopaedic & trauma surgery < SURGERY, Knee < ORTHOPAEDIC & TRAUMA SURGERY                                                                                                                                                                                                                                                                                                                                                                                                                                                                                                                                                                                                                                                                                                                                                                                                                                                                                                                                                                                                                         |
|                                 |                                                                                                                                                                                                                                                                                                                                                                                                                                                                                                                                                                                                                                                                                                                                                                                                                                                                                                                                                                                                                                                                                                                                                                                      |



1  
2  
3  
4  
5  
6  
7  
8  
9  
10  
11  
12  
13  
14  
15  
16  
17  
18  
19  
20  
21  
22  
23  
24  
25  
26  
27  
28  
29  
30  
31  
32  
33  
34  
35  
36  
37  
38  
39  
40  
41  
42  
43  
44  
45  
46  
47  
48  
49  
50  
51  
52  
53  
54  
55  
56  
57  
58  
59  
60



1  
2  
3 1 **A prospective double-blind randomized controlled trial protocol comparing**  
4  
5 2 **bone marrow aspirate concentrate intra-articular injection combined with**  
6  
7 3 **subchondral injection versus intra-articular injection alone**  
8  
9 4 **for the treatment of symptomatic knee osteoarthritis.**  
10  
11  
12 5  
13  
14

15 6 Simone Silva<sup>1</sup>, Luca Andriolo<sup>1</sup>, Angelo Boffa<sup>1</sup>, Alessandro Di Martino<sup>1</sup>, Davide Reale<sup>1</sup>, Giulio  
16  
17 7 Vara<sup>2</sup>, Marco Miceli<sup>2</sup>, Carola Cavallo<sup>3</sup>, Brunella Grigolo<sup>3</sup>, Stefano Zaffagnini<sup>1</sup>, Giuseppe Filardo<sup>4</sup>  
18  
19  
20 8

21  
22 9 (1) II Orthopaedic and Traumatologic Clinic, IRCCS Istituto Ortopedico Rizzoli, Bologna, Italy

23  
24 10 (2) Diagnostic and Interventional Radiology, IRCCS Istituto Ortopedico Rizzoli, Bologna, Italy

25  
26 11 (3) Laboratory RAMSES, Research & Innovation Technology Department, IRCCS Istituto  
27  
28 12 Ortopedico Rizzoli, Bologna, Italy

29  
30 13 (4) Applied and Translational Research center (ATRC), IRCCS Istituto Ortopedico Rizzoli,  
31  
32 14 Bologna, Italy  
33  
34  
35  
36 15  
37

38 16 *Corresponding author:*

39  
40 17 Simone Silva, MD, II Orthopaedic and Traumatologic Clinic, IRCCS Istituto Ortopedico Rizzoli,  
41  
42 18 Via Di Barbiano,1/10 - 40136 Bologna, Italy. Tel. +39 051 6366567. Fax +39 051 583789  
43  
44 19 E-mail: simone.silva.dls@gmail.com. ORCID-ID: 0000-0003-0955-4475  
45  
46  
47 20  
48

49 21 *Keywords:* Osteoarthritis; Mesenchymal Stromal Cells; Subchondral injections; Bone marrow  
50  
51 22 aspirate concentrate; BMAC  
52  
53  
54 23

55  
56 24 *Word Count:* 4079 words (excluding title page, references, figures and tables)  
57  
58  
59 25  
60  
26

1  
2  
3 27 **ABSTRACT**  
4  
5

6 28 *Introduction:* Subchondral and intra-articular injections of bone marrow aspirate concentrate  
7  
8 29 (BMAC) showed promising results for knee OA patients. To date, there is no evidence to  
9  
10 30 demonstrate whether the combination of these treatments provides higher benefits than the intra-  
11  
12 31 articular injection alone.  
13  
14  
15

16 32 *Methods and analysis:* Eighty-six patients with symptomatic knee OA (aged between 40 and 70) are  
17  
18 33 randomized to BMAC intra-articular injection combined with subchondral BMAC injection or  
19  
20 34 BMAC intra-articular injection alone in a ratio of 1:1. The primary outcome is the total Western  
21  
22 35 Ontario and McMaster Universities Osteoarthritis Index (WOMAC), the secondary outcomes the  
23  
24 36 International Knee Documentation Committee (IKDC) Subjective and Objective Knee Evaluation  
25  
26 37 Form, the Tegner activity scale, the EuroQol-visual analogue scale (EQ-VAS), and the health  
27  
28 38 questionnaire EQ-5D score. Additional CT and MRI evaluations are performed at the baseline  
29  
30 39 assessment and at the final 12-month follow-up. The hypothesis is that the combined injection  
31  
32 40 provides higher knee pain and function improvement compared to BMAC intra-articular injection  
33  
34 41 alone. The primary analysis follows an intention-to-treat principle.  
35  
36  
37  
38  
39

40 42 *Ethics and dissemination:* The study protocol has been approved by the Emilia Wide Area Ethical  
41  
42 43 Committee of the Emilia-Romagna Region (CE-AVEC), Bologna, Italy. Written informed consent  
43  
44 44 is obtained from all the participants. Findings of this study will be disseminated the through peer-  
45  
46 45 reviewed publications and conference presentations.  
47  
48  
49  
50  
51  
52  
53  
54  
55  
56  
57  
58  
59  
60

1  
2  
3 47 *Strengths and limitations of this study:*  
4  
5

6 48

- 7  
8 49 • This is the first prospective, randomized, double-blind and controlled trial evaluating  
9  
10 results of BMAC intra-articular injection combined with subchondral injection compared to  
11 50  
12 BMAC intra-articular injection alone in knee OA.  
13 51  
14  
15 52 • Patients are analyzed using PROMs, objective measures, MRI and CT examination,  
16  
17 and biomarker evaluation.  
18 53  
19  
20 54 • Patient base-line characteristics and disease-related factors can help to better define  
21  
22 the aspects that make different individuals more or less responsive to this type of treatments.  
23 55  
24  
25 56 • The uncontrolled pain medication use by patients (although being discouraged) could  
26  
27 influence the primary outcome and this is a relevant limitation of the study.  
28 57  
29  
30 58 • This study can clarify the benefits, and limitations, of the newly proposed  
31  
32 combination of intra-articular and subchondral BMAC injections, providing clear  
33 59  
34 60 indications for the clinical practice.  
35  
36 61  
37

38 62 *Trial registration:* Clinical Trials.gov Identifier number NCT03876795  
39  
40

41 63

42  
43 64 *Protocol version:* Version 1 (14 May 2018)  
44  
45 65  
46

47 66 *Ethical approval:* (Prot. n. 0003132) for study protocol Interface (identifier: 207/2018/Sper/IOR)  
48  
49 was obtained on 5 May 2018 from the Ethical Committee Area Vasta Emilia Centro (CE-AVEC) of  
50 67  
51 the Emilia-Romagna Region settled at the University General Hospital Sant'Orsola-Malpighi of  
52 68  
53 Bologna.  
54 69  
55  
56

57 70

58  
59 71 *Roles and responsibilities:*  
60

1  
2  
3  
4  
5  
6  
7  
8  
9  
10  
11  
12  
13  
14  
15  
16  
17  
18  
19  
20  
21  
22  
23  
24  
25  
26  
27  
28  
29  
30  
31  
32  
33  
34  
35  
36  
37  
38  
39  
40  
41  
42  
43  
44  
45  
46  
47  
48  
49  
50  
51  
52  
53  
54  
55  
56  
57  
58  
59  
60

- 72 Simone Silva<sup>1</sup> (simone.silva@ior.it): Physician and investigator
- 73 Luca Andriolo<sup>1</sup> (lucas.andriolo@ior.it): Physician and investigator
- 74 Angelo Boffa<sup>1</sup> (angeloboffa@libero.it): Physician and investigator
- 75 Alessandro Di Martino<sup>1</sup> (aledimartino75@gmail.com): Senior physician and principal investigator
- 76 Davide Reale<sup>1</sup> (dawidh.reale@gmail.com): Physician and investigator
- 77 Giulio Vara<sup>2</sup> (giulio.vara@gmail.com): Physician and imaging evaluator
- 78 Marco Miceli<sup>2</sup> (marco.miceli@ior.it): Physicians and senior imaging evaluator
- 79 Carola Cavallo<sup>3</sup> (carola.cavallo@ior.it): Biologist for products and patients' characterization
- 80 Brunella Grigolo<sup>3</sup> (brunella.grigolo@ior.it): Senior biologist for products and patients' characterization
- 81 characterization
- 82 Stefano Zaffagnini<sup>1</sup> (stefano.zaffagnini@unibo.it): Senior physician and investigator
- 83 Giuseppe Filardo<sup>4</sup> (ortho@gfilardo.com): Senior author, project PI, coordinator
- 84
- 85 (1) II Orthopaedic and Traumatologic Clinic, IRCCS Istituto Ortopedico Rizzoli, 40136 Bologna, Italy
- 86 Italy
- 87 (2) Diagnostic and Interventional Radiology, IRCCS Istituto Ortopedico Rizzoli, Bologna 40136, Italy
- 88 Italy
- 89 (3) Laboratory RAMSES, Research & Innovation Technology Department, IRCCS Istituto Ortopedico Rizzoli, 40136 Bologna, Italy
- 90 Ortopedico Rizzoli, 40136 Bologna, Italy
- 91 (4) Applied and Translational Research center (ATRC), IRCCS Istituto Ortopedico Rizzoli, 40136 Bologna, Italy
- 92 Bologna, Italy

## 94 INTRODUCTION

95  
96 Knee osteoarthritis (OA) is a chronic, degenerative disease leading to irreversible structural and  
97 functional changes in the entire joint, including subchondral bone sclerosis and cartilage loss, and  
98 progressively determines debilitating pain and loss of function.[1-2] It affects a large part of the  
99 aging population with a high impact on patients and healthcare costs.[3] Total knee arthroplasty  
100 represents a definitive solution to address knee OA, but it is also encumbered by several  
101 complications.[4] Conservative approaches, such as physical therapy and anti-inflammatory drugs,  
102 should be pursued, but their benefits are generally temporary with short-term relief, and they are not  
103 able to affect the natural course of the disease progression.[5] Thus, to delay or avoid the need for  
104 arthroplasty, research efforts have been made to find new minimally invasive and more effective  
105 procedures to address knee OA.

106 In this light, the use of orthobiologics is gaining increasing interest due to the availability of several  
107 promising products, ranging from blood-derivatives (platelet-rich plasma - PRP) to minimally  
108 manipulated mesenchymal stromal cells (MSCs) harvested from bone marrow or adipose tissue.  
109 Although the intra-articular use of these products for the treatment of knee OA provided overall  
110 positive results, the improvement in terms of pain relief and function remains partial and not always  
111 satisfactory.[6] Thus, a new approach has been recently proposed to further exploit the potential of  
112 biologic products by targeting the subchondral bone.[7] This strategy is supported by the evidence  
113 revealing that subchondral bone alterations may play a critical role in both the pathophysiology and  
114 progression of knee OA.[8][9] It has been suggested that with age and knee OA the number and  
115 functionality of MSCs present in the subchondral bone of the knee may decrease. Therefore, MSCs  
116 subchondral injections could address this deficiency underlying the pathophysiology by providing  
117 many bioactive mediators which have been shown to exert positive effects on joint tissues.[10]  
118 MSCs subchondral bone injections showed to be safe and may provide even better results than  
119 MSC intra-articular injections addressing knee OA in terms of survival to knee arthroplasty.[11]

1  
2  
3 120 Moreover, the combination of subchondral and intra-articular injections of bone marrow aspirate  
4  
5 121 concentrate (BMAC) already showed promising results in terms of safety and clinical  
6  
7  
8 122 outcomes.[12] However, beside promising early findings and the increasing use of this approach in  
9  
10 123 the clinical practice, there is only limited and low-level evidence, and it would be clinically relevant  
11  
12 124 to evaluate with a high-level study design the real benefit provided by the addition of these  
13  
14  
15 125 subchondral injections to improve the results of BMAC intra-articular injections for knee OA.  
16

### 17 126 18 19 127 *Objectives and trial design*

20  
21 128 A double-blinded randomized controlled trial (RCT) was designed to compare the efficacy of a  
22  
23  
24 129 combination of intra-articular and subchondral injections of BMAC (treatment group) versus  
25  
26 130 BMAC intra-articular injection alone (control group) to treat knee OA, with a 1:1 allocation ratio.  
27  
28  
29 131 The aim of this superiority trial is to evaluate the safety and the clinical potential of this new  
30  
31 132 treatment approach up to one year of follow-up, and to verify the hypothesis that the combination of  
32  
33 133 subchondral and intra-articular injections provides higher knee pain and function improvement  
34  
35 134 compared to BMAC intra-articular injection alone in knee OA.  
36

## 37 135 38 39 136 **METHODS AND ANALYSIS**

### 40 41 42 137 *Study setting*

43  
44 138 The study is a single center double-blind RCT, with all activities related to the study performed in a  
45  
46  
47 139 single site, the IRCCS Rizzoli Orthopaedic Institute, Bologna, Italy.

48  
49 140 This trial protocol is produced according to the SPIRIT (Standard Protocol Items:  
50  
51 141 Recommendations for Interventional Trials) reporting guidelines. [13]  
52

### 53 54 142 55 56 143 *Patient and public involvement*

57  
58 144 Patients are not involved in planning of research questions, outcome measures or design of the  
59  
60 145 study.

1  
2  
3 146  
45 147 *Eligibility criteria*6  
7  
8 148 Patients are recruited according to the following criteria.9  
10 149 Inclusion criteria:

- 11
- 
- 12 150 - Male or female patients, aged between 40 and 70 years old;
- 
- 13
- 
- 14
- 
- 15 151 - OA of the medial compartment of the knee (grade II or III according to the Kellgren-
- 
- 16
- 
- 17 152 Lawrence classification);
- 
- 18
- 
- 19 153 - Failure after at least 6 months of conservative treatment (drug therapy with NSAIDs and
- 
- 20
- 
- 21
- 
- 22 154 painkillers, hyaluronic acid infiltration, corticosteroid infiltration, PRP);
- 
- 23
- 
- 24 155 - Patients' ability and consent to participate in clinical and radiological follow-up;
- 
- 25
- 
- 26 156 - Signature of informed consent.

27  
28 157 Exclusion criteria:

- 29
- 
- 30
- 
- 31 158 - Patients with trauma in the 6 months prior to surgery;
- 
- 32
- 
- 33 159 - Patients with malignancy;
- 
- 34
- 
- 35 160 - Patients suffering from rheumatic diseases;
- 
- 36
- 
- 37
- 
- 38 161 - Patients suffering from uncompensated diabetes;
- 
- 39
- 
- 40 162 - Patients suffering from uncompensated thyroid metabolic disorders;
- 
- 41
- 
- 42 163 - Patients abusing alcoholic beverages or drugs;
- 
- 43
- 
- 44
- 
- 45 164 - Patients with axial deviations
- $> 5^\circ$
- ;
- 
- 46
- 
- 47 165 - Body Mass Index
- $> 35$
- ;
- 
- 48
- 
- 49 166 - Patients treated with joint injections in the previous 6 months;
- 
- 50
- 
- 51 167 - Patients treated with surgery at the same knee in the previous 12 months.

52  
53  
54 168  
55  
56 169 *Intervention*57  
58 170 All patients are treated by orthopedic surgeons with established experience in cartilage and  
59  
60 171 osteoarthritis orthobiologic procedures. The procedure is performed in a single step in the operating



1  
2  
3  
4  
5  
6  
7  
8  
9  
10  
11  
12  
13  
14  
15  
16  
17  
18  
19  
20  
21  
22  
23  
24  
25  
26  
27  
28  
29  
30  
31  
32  
33  
34  
35  
36  
37  
38  
39  
40  
41  
42  
43  
44  
45  
46  
47  
48  
49  
50  
51  
52  
53  
54  
55  
56  
57  
58  
59  
60

172 room with patients in supine position under spinal loco-regional anaesthesia. The ipsilateral hip is  
173 sterilely prepared and draped for anterior iliac crest bone marrow aspiration. The anterior superior  
174 iliac spine is the anatomical landmark for a small surgical incision. A diamond tip trocar is inserted  
175 in this point and then advanced into the bone marrow using a drill. Bone marrow is collected using  
176 two 30 ml syringes coated with heparin for a total of 60 ml. The harvested bone marrow is filtered  
177 with a heparin washed filter and then centrifuged through the Magellan® centrifuge (Arteriocyte  
178 Medical Systems, MA, USA) at a rate of 3600 RPM for approximately 15 minutes, thus obtaining  
179 10 ml of BMAC. The BMAC procedure involved a kit available in the clinical practice. In fact, the  
180 purpose of the study was not to evaluate a new product, but rather to explore the potential of  
181 applying BMAC also at the subchondral bone level, to give indications on the potential of this  
182 approach for physicians considering this technique for their clinical practice.

183 For each patient, BMAC samples that are not used for surgical treatment are sent to the laboratory  
184 for the count of mononuclear cells, cell clonogenic ability by colony forming unit-fibroblast test and  
185 phenotypical characterization by flow-cytometry evaluation.

186 Concomitantly with the bone marrow concentration process, all patients undergo an arthroscopic  
187 evaluation to confirm the location on both medial femoral condyle and medial tibial plateau  
188 involved by osteoarthritic lesions. Arthroscopy is done using the standard antero-lateral, antero-  
189 medial, and supero-medial portals. The same portals are used to access the subchondral bone in the  
190 experimental group in order to maintain blinding. If the arthroscopic examination reveals intra-  
191 articular problems (excluding minor arthroscopic shaving) requiring surgical intervention which  
192 may affect the results of the procedure, the patient is excluded from the study.

193 Once the arthroscopy and the BMAC procedure are completed, the injections are performed. The  
194 treatment group receives two 2.5 ml subchondral BMAC injections, that are performed inserting  
195 two 8-Gauge trocars through the supero-medial and antero-medial arthroscopic portals and are  
196 manually introduced with clockwise and anticlockwise movements, under fluoroscopic control, into  
197 the bone of both medial femoral condyle and tibial plateau. Following arthroscopic portals suture,

1  
2  
3 198 both groups of treatment receive a 3ml intra-articular injection of BMAC using a lateral  
4  
5 199 suprapatellar approach. An elastic bandage is made after wounds medication. The whole procedure  
6  
7  
8 200 is presented in Figure 1.

9  
10 201 Postoperatively, patients are discharged on the same day of the procedure or the day after, based on  
11  
12 202 patient condition. Pain control is prescribed as needed with analgesics only in the immediate period  
13  
14 203 after treatment, and thromboembolic prophylaxis is prescribed for two weeks. During the same  
15  
16  
17 204 time, patients are taught to walk with the support of two crutches to allow a partial weight-bearing  
18  
19 205 on the operated limb. Cryotherapy is started within the first 24 hours. Passive mobilisation and  
20  
21 206 quadriceps isometric exercises are started at the second post-operative day. Patients are permitted to  
22  
23  
24 207 return to most of their daily activities as tolerated once they reach full weight-bearing. No other  
25  
26 208 conservative treatments are prescribed during the study period. Joint impacting sport activities are  
27  
28 209 discouraged within the first month after treatment.

### 30 210 31 210 32 33 211 *Outcomes*

34  
35 212 The primary outcome is the total Western Ontario and McMaster Universities Osteoarthritis Index  
36  
37 213 (WOMAC) at 12 month, a 24 items self-administered questionnaire taking into account articular  
38  
39  
40 214 pain and stiffness and physical function limitations due to knee OA. It ranges from 0 to 96 points  
41  
42 215 and higher WOMAC scores indicate worse pain, stiffness, and functional limitations. The total  
43  
44 216 WOMAC score was chosen as primary outcome aiming at capturing a more comprehensive  
45  
46  
47 217 assessment of symptoms and function benefits offered by the treatments.

48  
49 218 The secondary outcomes include the total WOMAC score at other follow-ups, the WOMAC  
50  
51 219 subscales (pain, stiffness, and physical function), as well as the International Knee Documentation  
52  
53  
54 220 Committee (IKDC) Subjective and Objective Knee Evaluation Form (a patient-completed tool  
55  
56 221 taking into account knee symptoms, knee function, and sport activity), the Tegner activity scale (a  
57  
58 222 one-item score based on work and sports activities), the EuroQol-visual analogue scale (EQ-VAS)

1  
2  
3 223 that provides an assessment of patients global health, and the health questionnaire EQ-5D score (a 5  
4  
5 224 level self-assessed, health related, quality of life questionnaire).  
6  
7  
8 225 Patients also undergo MRI and CT assessments. MRI scans are obtained with a high-resolution 3  
9  
10 226 Tesla MRI scanner with PD-weighted Turbo Spin Echo 3D sequences with and without fat  
11  
12 227 saturation (FS), 3D T2\* Gradient Echo (MERGE) with FS, axial PD-weighted Fast Spin Echo  
13  
14 228 sequences with FS, and Multi-Echo T2 Mapping on the sagittal plane with 8 different Echo Times.  
15  
16  
17 229 The Whole-Organ Magnetic Resonance Imaging Score (WORMS) is used to assess seven features  
18  
19 230 of the treated knees: articular cartilage morphology, bone marrow oedema, subchondral cysts,  
20  
21 231 articular profile, marginal osteophytes, meniscal integrity, and synovitis.  
22  
23  
24 232 Articular cartilage morphology is examined with the 3D MERGE and the T2 Mapping; bone  
25  
26 233 marrow oedema and synovitis with the PD fat sat sequences, the articular profiles with the PD and  
27  
28 234 MERGE sequences, and the meniscal integrity with the DP sequences.  
29  
30  
31 235 CT knee scans are obtained with a 64-channels CT scanner to better assess the structural resolution  
32  
33 236 of bone trabeculae as well as to assess the presence of osteophytes, calcifications, and cancellous  
34  
35 237 bone microcysts. The images are acquired using a slice thickness of 1.25 mm and an interval of  
36  
37 238 0.625 mm at 120kV with 250 mA, post-processed with the “Bone” filter, and reformatted in the  
38  
39  
40 239 coronal and sagittal plane.  
41  
42 240 Blood samples are obtained from participants before treatment and at 2, 6, and 12 months of follow-  
43  
44 241 up. Samples are analysed for inflammatory (IL-1 $\beta$ , TNF $\alpha$ ) and OA progression markers (Cleavage  
45  
46 242 of Type II Collagen, Serum C-telopeptide fragments of type II collagen).  
47  
48  
49 243  
50  
51 244 *Participant timeline*  
52  
53  
54 245 Research assistants first conduct a screening of potential candidates over the telephone. If early  
55  
56 246 checks of study eligibility are favourable, participants are booked in for a face-to-face screening  
57  
58 247 visit with an orthopaedic specialist to confirm eligibility and explain the study protocol. After the  
59  
60 248 screening visit, patients complete the questionnaires, undergo a knee MRI and CT, and sign the

informed written consent. Patient enrolment started on November 2019. The first patient was treated in December 2019. Follow-up assessments is performed at 2, 6, and 12 months postoperatively with patient questionnaires and blood samples. At the final 12-month follow-up patients undergo knee MRI and CT scans. Due to operational delays caused by the COVID-19 pandemic, patient treatment is still ongoing; the study conclusion is foreseen before the end of 2023. Participant timeline is outlined in Table 1.

**Table 1.** The study procedures schedule.

|                            | Before treatment | Treatment | 2-month follow-up | 6-month follow-up | 12-month follow-up |
|----------------------------|------------------|-----------|-------------------|-------------------|--------------------|
| Patient eligibility        | X                |           |                   |                   |                    |
| Informed consent           | X                |           |                   |                   |                    |
| WOMAC (total and subscale) | X                |           | X                 | X                 | X                  |
| IKDC score                 | X                |           | X                 | X                 | X                  |
| Tegner activity score      | X                |           | X                 | X                 | X                  |
| EQ-5D and EQ-VAS           | X                |           | X                 | X                 | X                  |
| Blood sample               |                  | X         | X                 | X                 | X                  |
| BMAC sample                |                  | X         |                   |                   |                    |
| MRI                        | X                |           |                   |                   | X                  |
| CT                         | X                |           |                   |                   | X                  |
| AE reporting               |                  | X         | X                 | X                 | X                  |

AE: Adverse Event; BMAC: Bone Marrow Aspirate Concentrate; CT: Computed tomography; EQ-5D: European Quality of Life Five Dimension; EQ-VAS: European Quality - Visual Analog Scale; IKDC: International Knee Documentation Committee; MRI: magnetic resonance imaging; WOMAC: Western Ontario and McMaster Universities Osteoarthritis Index

### *Recruitment*

Patients undergo an outpatient visit conducted by properly trained medical staff belonging to the team of orthopaedic surgeons of the Rizzoli Orthopaedic Institute, which assess patients' eligibility and take care of patient education.

### *Blinding*

1  
2  
3 267 This is a double-blind RCT with both participants and physicians assessing outcomes being blinded  
4  
5 268 to treatment allocation. Only after the evaluation at the 12-month follow-up the blinding is opened  
6  
7  
8 269 and it is revealed to the patient which one of the two treatments was administered.

9  
10 270 The blindness of treated patients is further guaranteed by the same number of surgical access and by  
11  
12 271 the same length of the surgical incision for both treatments. For ethical reason, no bone puncturing  
13  
14  
15 272 and injection was performed in the control group. This, however, did not compromise blinding  
16  
17 273 since patients presented the same number and type of surgical incisions. Early unblinding occurs in  
18  
19 274 case of premature patients drop-out. The level of blinding prevents from the enhanced placebo  
20  
21  
22 275 effect that a subchondral injection could add to the placebo effect of the intra-articular injection  
23  
24 276 alone.[14]

25  
26 277 Imaging evaluation is provided by experienced radiologists which are blinded as well to the type of  
27  
28 278 treatment that the patients have received and evaluation time.

29  
30  
31 279

### 32 33 280 *Allocation*

34  
35 281 A total of 86 eligible patients are allocated to receive either a combination of intra articular and  
36  
37 282 subchondral BMAC injection or BMAC intra articular injection alone, in a 1:1 ratio (43 patients for  
38  
39  
40 283 each group of treatment) based on a computer-generated random numbers randomisation. This is  
41  
42 284 conducted by research staff members dedicated to study organization and monitoring with no direct  
43  
44  
45 285 involvement in the study procedures. The randomization list is covered by password and accessible  
46  
47 286 only by staff members with no direct involvement in the study.

48  
49 287

### 50 51 288 *Adverse events and assessment process*

52  
53 289 Adverse events are monitored throughout the study, intraoperatively and at clinical follow-up  
54  
55  
56 290 evaluations. Standard safety and efficacy monitoring is performed through regular face-to-face  
57  
58 291 visits and phone calls between visits. The patients are also requested to report any adverse events to  
59  
60 292 the research staff spontaneously. Every adverse event is recorded in the patient Case Report Form

1  
2  
3 293 (CRF). Serious adverse events are considered those resulting in death or being life-threatening,  
4  
5 294 requiring hospitalization or intervention to prevent permanent impairment or damage; they are  
6  
7  
8 295 reported in accordance with the requirements of the Ethical Committee. Use of rescue pain  
9  
10 296 medication is recorded at all visits without a diary and without homogenizing the type of  
11  
12 297 medication, which is decided by patients autonomously (although discouraged for study purposes).  
13  
14  
15 298 To ensure high-quality execution of the trial in accordance with the protocol, all trial staff is trained  
16  
17 299 by the chief investigators and provided with a standard protocol book which contains details of  
18  
19 300 standard operating procedures, trial contacts, visits, measurements, monitoring, and case report  
20  
21 301 forms.  
22  
23

#### 24 302 25 26 303 *Data collection methods*

27  
28 304 Data are firstly collected on paper-based case report forms, with the help of research trained  
29  
30  
31 305 orthopaedic residents blinded to treatment allocation, and subsequently trained data analysts process  
32  
33 306 data into electronic form for statistical analysis. Baseline and final MRI and CT knee scans are  
34  
35 307 coded and stored at the Rizzoli Orthopaedic Institute to ensure data quality control. Operative data  
36  
37  
38 308 are collected electronically by the respective surgeons shortly after surgery.  
39

#### 40 309 41 42 310 *Data management*

43  
44 311 Study data are stored in a password-protected spreadsheet on a server that is hosted at the Rizzoli  
45  
46  
47 312 Orthopaedical Institute. Data transfer is encrypted with all data de-identified. Only trained research  
48  
49 313 personnel specifically dedicated to the data handling can access the database and ensures the  
50  
51 314 correspondence of the electronic data with the original paper-based questionnaires and medical  
52  
53 315 charts.  
54

#### 55 56 316 57 58 317 *Statistical methods*

1  
2  
3 318 A power analysis (G\*Power 3.1.9.2) was conducted using assumptions of 90% of power and 5% of  
4  
5 319 probability of type 1 error ( $\alpha = 0.05$ ), with a SD of 18.2 points based on a pilot study and a  
6  
7  
8 320 hypothesized 10-point difference in total WOMAC score at 12 months between treatments.  
9  
10 321 Accordingly, 76 participants are needed. This leads to a moderate size-effect (0.55) as per the  
11  
12 322 Cohen convention (effects: small  $\geq .20$ , medium  $\geq .50$ , large  $\geq .80$ ), and is in line with other effect  
13  
14 323 sizes and SD reported in the literature. We increased the number of participants to a total of 86  
15  
16  
17 324 patients (43 in each arm) to account for a possible 10% loss to follow-up. The primary analyses are  
18  
19 325 intention-to-treat analyses of primary and secondary outcomes. Per protocol analyses will be  
20  
21 326 performed as the secondary analyses. All those who have started the treatment are considered part  
22  
23  
24 327 of the research, regardless of whether they will complete it. For the missing data, they will be  
25  
26 328 analyzed using the multiple imputation analysis, performed by filling the missing data with random  
27  
28 329 values from the distribution of the variable.  
29  
30  
31 330 Continuous variables are be expressed as means and standard deviations if normally distributed,  
32  
33 331 as medians and range if not. Categorical variables are be expressed as frequencies and percentage.  
34  
35 332 Normality of the distribution is be assessed using the Shapiro Wilks test. The Levene test is be used  
36  
37  
38 333 to assess the homoscedasticity of the data. The Repeated Measures ANOVA, followed by the post  
39  
40 334 hoc Sidak pairwise test is performed to compare the scores at different follow-up times. The  
41  
42 335 OneWay ANOVA test is performed to assess the between group differences of continuous and  
43  
44 336 normally distributed and homoscedastic data; the Mann Whitney test is used otherwise. The  
45  
46  
47 337 ANOVA test, followed by the Scheffè post hoc pairwise comparison, is used also to assess the  
48  
49 338 among groups differences of continuous, normally distributed and homoscedastic data; the Kruskal  
50  
51 339 Wallis, test followed by the Mann Whitney test with the Bonferroni correction for multiple  
52  
53 340 comparison, is used otherwise. The Monte Carlo method is used to evaluate the non-parametric tests  
54  
55  
56 341 in case of small size of the sub-groups. Pearson chi square exact test is performed to investigate  
57  
58 342 relationships between grouping variables. The Spearman rank Correlation is used to assess  
59  
60 343 correlations between the numerical scores and continuous data. The General linear model, or the



1  
2  
3 344 Generalized linear model in case of not normal distribution, is used as multivariate analysis to  
4  
5 345 compare the group's outcomes corrected by the influencing factors. The Kaplan Meyer analysis is  
6  
7  
8 346 performed to assess survival to major adverse events. For all tests  $p < 0.05$  is considered significant.  
9  
10 347 SPSS version 19.0 (IBM Corp., Armonk, NY, USA) is applied for the analyses.  
11

#### 12 348 13 14 15 349 *Data monitoring*

16  
17 350 A central project data manager is tasked to perform data quality control on all collected data. An  
18  
19 351 interim report and a final report are foreseen, to be submitted to the Ministry of Health who funded  
20  
21  
22 352 the project. The monitoring personnel belongs to a research structure of the Scientific Direction of  
23  
24 353 the Institution, the Applied and Translational Research Center, and it is independent from the Clinic  
25  
26 354 and the medical personnel performing the study procedures. A further project auditing is performed  
27  
28  
29 355 by another independent entity of the Institution, the Clinical Trial Center. The final study report is  
30  
31 356 also sent to the Ethic Committee.  
32

### 33 357 34 35 358 **ETHICS AND DISSEMINATION**

#### 36 37 359 *Research ethics approval*

38  
39  
40 360 Ethical approval was obtained on 5 May 2018 from the central Emilia Wide Area Ethical  
41  
42 361 Committee of the Emilia-Romagna Region (CE-AVEC) settled at the University General Hospital  
43  
44 362 Sant'Orsola-Malpighi of Bologna.  
45

#### 46 47 363 48 49 364 *Protocol amendments*

50  
51 365 Minor protocol amendments, for example, database production changes to facilitate monitoring  
52  
53 366 processes or improve outcome assessment by questionnaire, are fully documented. In case of major  
54  
55  
56 367 amendments, for example, changes to the patient information sheet and consent form, change of a  
57  
58 368 local project leader or the inclusion of a new project site, they are submitted for approval by the  
59  
60 369 lead Ethics Committee as required.



1  
2  
3  
4  
5  
6  
7  
8  
9  
10  
11  
12  
13  
14  
15  
16  
17  
18  
19  
20  
21  
22  
23  
24  
25  
26  
27  
28  
29  
30  
31  
32  
33  
34  
35  
36  
37  
38  
39  
40  
41  
42  
43  
44  
45  
46  
47  
48  
49  
50  
51  
52  
53  
54  
55  
56  
57  
58  
59  
60

370  
371  
372  
373  
374  
375  
376  
377  
378  
379  
380  
381  
382  
383  
384  
385  
386  
387  
388  
389  
390  
391  
392  
393  
394  
395

### *Consent or assent*

All participants will provide informed written consent in Italian and they may dropout the trial at any time during the study course.

### *Confidentiality*

Data are recorded using case report forms and processed centrally at the Rizzoli Orthopedics Institute, Bologna, Italy. The hard copies of case report forms are stored in a locked area with secured and restricted access. The electronic data are stored on password protected servers with restricted access. All data collected are kept strictly confidential. Daily backups of all electronic data occur to minimize any risk of lost data. After study completion, paper copies of data are archived in secure storage. Identifiers are kept separately and accessible only to restricted study personnel in case follow-up of study patients is necessary; however, electronic data continue to be kept in a secure electronic database. This remains password protected and with access given only to the study investigators unless otherwise authorized by the study team.

### *Access to data*

Only members of the research team who need to contact study patients, enter data, or perform data quality control have access to patient information.

### *Dissemination policy*

This trial is produced according to the SPIRIT (Standard Protocol Items: Recommendations for Interventional Trials) international standards. Results are disseminated through peer-reviewed publications and will be submitted for presentation at national and international conferences. The authorship is based on International Committee of Medical Journal Editors 2018 Recommendations.

1  
2  
3 396 *Scientific relevance and broader impact*  
4

5 397 This study provides a detailed method of treatment for knee OA and can offer clear indications on  
6  
7  
8 398 the potential and limitations of the combined use of intra-articular and subchondral bone injections  
9  
10 399 of BMAC. The BMAC analysis provides characterisation of this product to shed greater light on the  
11  
12 400 properties ensuring its effectiveness. Baseline patient-related and disease-related factors analysis  
13  
14 401 can allow to better define those characteristics that make different subjects more or less responsive  
15  
16  
17 402 to this type of treatment.  
18

19 403

20  
21 404 *Contributorship statement*  
22

23  
24 405 ADM is the principal investigator of this study. SS, LA, AB, DR wrote the manuscript and will  
25  
26 406 conduct the trial. GV and MM are responsible of imaging evaluation. CC and BG are involved in  
27  
28 407 products and patients' characterization. ADM, SZ and GF applied for funding and supervise the  
29  
30 408 trial. All authors read and approved the final protocol.  
31  
32

33 409

34  
35 410 *Competing interest*  
36

37  
38 411 SZ reports non-financial support from personal fees from I+SRL, grants from FidiaFarmaceutici  
39  
40 412 S.p.A., Cartiheal Ltd, IGEA clinical biophysics, BIOMET, and Kensey Nash, outside the submitted  
41  
42 413 work. The funders had no role in the design of the study, in the collection, analyses, or  
43  
44 414 interpretation of data, in the writing of the manuscript, or in the decision to publish the results. The  
45  
46 415 principal investigator and other authors declare no financial and other competing interests.  
47  
48

49 416

50  
51 417 *Funding*  
52

53  
54 418 The study is funded by Italian Health Ministry in the Project "Giovane Ricercatore" (GR-2016-  
55  
56 419 02361990).  
57

58 420

59  
60 421 *Data sharing statement*

1  
2  
3  
4  
5  
6  
7  
8  
9  
10  
11  
12  
13  
14  
15  
16  
17  
18  
19  
20  
21  
22  
23  
24  
25  
26  
27  
28  
29  
30  
31  
32  
33  
34  
35  
36  
37  
38  
39  
40  
41  
42  
43  
44  
45  
46  
47  
48  
49  
50  
51  
52  
53  
54  
55  
56  
57  
58  
59  
60

422 Data sharing not applicable because no data are available in this protocol study.

423

## 424 REFERENCES

425

- 426 1. Mobasheri A, Batt M. An update on the pathophysiology of osteoarthritis. *Ann Phys Rehabil Med*. 2016 Dec;59(5-6):333-339.
- 427 2. Donell S. Subchondral bone remodelling in osteoarthritis. *EFORT Open Rev*. 2019 Jun 428 3;4(6):221-229.
- 429 3. Bitton R. The economic burden of osteoarthritis. *Am J Manag Care*. 2009 Sep;15(8 430 Suppl):S230-5.
- 431 4. Delanois RE, Mistry JB, Gwam CU, et al. Current Epidemiology of Revision Total Knee 432 Arthroplasty in the United States. *J Arthroplasty*. 2017 Sep;32(9):2663-2668.
- 433 5. Filardo G, Kon E, Longo UG, et al. Non-surgical treatments for the management of early 434 osteoarthritis. *Knee Surg Sports Traumatol Arthrosc*. 2016 Jun;24(6):1775-85.
- 435 6. Cavallo C, Boffa A, Andriolo L, et al. Bone marrow concentrate injections for the treatment 436 of osteoarthritis: evidence from preclinical findings to the clinical application. *Int Orthop*. 437 2021 Feb;45(2):525-538.
- 438 7. Hernigou P, Auregan JC, Dubory A, et al. Subchondral stem cell therapy versus 439 contralateral total knee arthroplasty for osteoarthritis following secondary osteonecrosis of 440 the knee. *Int Orthop*. 2018 Nov;42(11):2563-2571.
- 441 8. Singh V, Oliashirazi A, Tan T, et al. Clinical and Pathophysiologic Significance of MRI 442 Identified Bone Marrow Lesions Associated with Knee Osteoarthritis. *Arch Bone Jt Surg*. 443 2019 May;7(3):211-219.
- 444 9. Yusup A, Kaneko H, Liu L, et al. Bone marrow lesions, subchondral bone cysts and 445 subchondral bone attrition are associated with histological synovitis in patients with end- 446

- 1  
2  
3 447 stage knee osteoarthritis: a cross-sectional study. *Osteoarthritis Cartilage*. 2015;23(11):1858-  
4  
5 448 1864.
- 7  
8 449 10. Hernigou, Jacques et al. "Role of Scaffolds, Subchondral, Intra-Articular Injections of Fresh  
9  
10 450 Autologous Bone Marrow Concentrate Regenerative Cells in Treating Human Knee  
11  
12 451 Cartilage Lesions: Different Approaches and Different Results." *International journal of*  
13  
14 452 *molecular sciences* vol. 22,8 3844.
- 16  
17 453 11. Hernigou, Philippe et al. "Subchondral bone or intra-articular injection of bone marrow  
18  
19 454 concentrate mesenchymal stem cells in bilateral knee osteoarthritis: what better postpone  
20  
21 455 knee arthroplasty at fifteen years? A randomized study." *International orthopaedics* vol.  
22  
23 456 45,2 (2021): 391-399.
- 25  
26 457 12. Kon E, Boffa A, Andriolo L, et al. Subchondral and intra-articular injections of bone  
27  
28 458 marrow concentrate are a safe and effective treatment for knee osteoarthritis: a prospective,  
29  
30 459 multi-center pilot study. *Knee Surg Sports Traumatol Arthrosc*. 2021;29(12):4232-4240  
31  
32
- 33 460 13. Chan AW, Tetzlaff JM, Gøtzsche PC, et al. SPIRIT 2013 explanation and elaboration:  
34  
35 461 guidance for protocols of clinical trials. *BMJ*. 2013 346:e7586  
36
- 37  
38 462 14. Fazeli, Mir Sohail et al. "Intra-articular placebo effect in the treatment of knee osteoarthritis:  
39  
40 463 a survey of the current clinical evidence." *Therapeutic advances in musculoskeletal*  
41  
42 464 *disease* vol. 14 1759720X211066689. 31 Jan. 2022, doi:10.1177/1759720X211066689  
43  
44  
45 465

## 46 466 **FIGURE LEGEND**

47 467 Figure 1 - Anterior iliac crest trocar insertion (A); Bone Marrow (BM) harvesting (B); BM filtration  
48  
49 468 (C); BM concentration (D); Trocar positioning under fluoroscopic control (E); Intra-articular and  
50  
51 469 subchondral Bone Marrow Aspirate Concentrate injections (F).  
52  
53  
54  
55  
56  
57  
58  
59  
60

1  
2  
3  
4  
5  
6  
7  
8  
9  
10  
11  
12  
13  
14  
15  
16  
17  
18  
19  
20  
21  
22  
23  
24  
25  
26  
27  
28  
29  
30  
31  
32  
33  
34  
35  
36  
37  
38  
39  
40  
41  
42  
43  
44  
45  
46  
47  
48  
49  
50  
51  
52  
53  
54  
55  
56  
57  
58  
59  
60

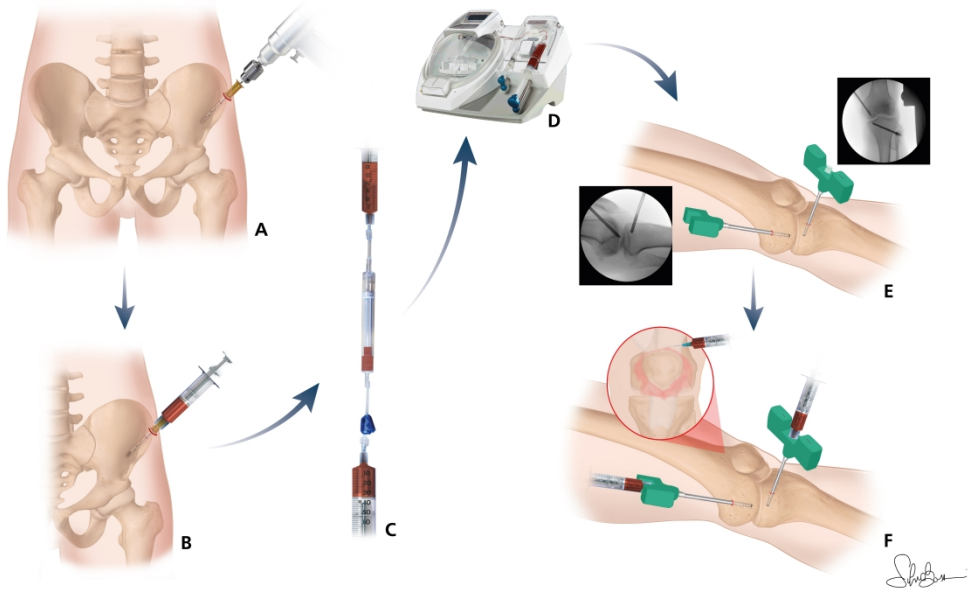

Figure 1: Anterior iliac crest trocar insertion (A); Bone Marrow (BM) harvesting (B); BM filtration (C); BM concentration (D); Trocar positioning under fluoroscopic control (E); Intra-articular and subchondral Bone Marrow Aspirate Concentrate injections (F).

422x279mm (300 x 300 DPI)

# Reporting checklist for protocol of a clinical trial.

Based on the SPIRIT guidelines.

## Instructions to authors

Complete this checklist by entering the page numbers from your manuscript where readers will find each of the items listed below.

Your article may not currently address all the items on the checklist. Please modify your text to include the missing information. If you are certain that an item does not apply, please write "n/a" and provide a short explanation.

Upload your completed checklist as an extra file when you submit to a journal.

In your methods section, say that you used the SPIRIT reporting guidelines, and cite them as:

Chan A-W, Tetzlaff JM, Gøtzsche PC, Altman DG, Mann H, Berlin J, Dickersin K, Hróbjartsson A, Schulz KF, Parulekar WR, Krleža-Jerić K, Laupacis A, Moher D. SPIRIT 2013 Explanation and Elaboration: Guidance for protocols of clinical trials. *BMJ*. 2013;346:e7586

|                                   |                     |                                                                                                              | Page<br>Number |
|-----------------------------------|---------------------|--------------------------------------------------------------------------------------------------------------|----------------|
| <b>Administrative information</b> |                     |                                                                                                              |                |
| Title                             | <a href="#">#1</a>  | Descriptive title identifying the study design, population, interventions, and, if applicable, trial acronym | 1              |
| Trial registration                | <a href="#">#2a</a> | Trial identifier and registry name. If not yet registered,                                                   | 1              |

|    |                          |                                                                                  |    |
|----|--------------------------|----------------------------------------------------------------------------------|----|
| 1  |                          | name of intended registry                                                        |    |
| 2  |                          |                                                                                  |    |
| 3  |                          |                                                                                  |    |
| 4  | Trial registration: data | <a href="#">#2b</a> All items from the World Health Organization Trial           | 1  |
| 5  |                          |                                                                                  |    |
| 6  | set                      | Registration Data Set                                                            |    |
| 7  |                          |                                                                                  |    |
| 8  |                          |                                                                                  |    |
| 9  | Protocol version         | <a href="#">#3</a> Date and version identifier                                   | 3  |
| 10 |                          |                                                                                  |    |
| 11 |                          |                                                                                  |    |
| 12 | Funding                  | <a href="#">#4</a> Sources and types of financial, material, and other support   | 17 |
| 13 |                          |                                                                                  |    |
| 14 |                          |                                                                                  |    |
| 15 | Roles and                | <a href="#">#5a</a> Names, affiliations, and roles of protocol contributors      | 4  |
| 16 |                          |                                                                                  |    |
| 17 | responsibilities:        |                                                                                  |    |
| 18 |                          |                                                                                  |    |
| 19 | contributorship          |                                                                                  |    |
| 20 |                          |                                                                                  |    |
| 21 |                          |                                                                                  |    |
| 22 |                          |                                                                                  |    |
| 23 | Roles and                | <a href="#">#5b</a> Name and contact information for the trial sponsor           | 1  |
| 24 |                          |                                                                                  |    |
| 25 | responsibilities:        |                                                                                  |    |
| 26 |                          |                                                                                  |    |
| 27 | sponsor contact          |                                                                                  |    |
| 28 |                          |                                                                                  |    |
| 29 | information              |                                                                                  |    |
| 30 |                          |                                                                                  |    |
| 31 |                          |                                                                                  |    |
| 32 |                          |                                                                                  |    |
| 33 | Roles and                | <a href="#">#5c</a> Role of study sponsor and funders, if any, in study design;  | 1  |
| 34 |                          |                                                                                  |    |
| 35 | responsibilities:        | collection, management, analysis, and interpretation of                          |    |
| 36 |                          |                                                                                  |    |
| 37 | sponsor and funder       | data; writing of the report; and the decision to submit the                      |    |
| 38 |                          |                                                                                  |    |
| 39 |                          | report for publication, including whether they will have                         |    |
| 40 |                          |                                                                                  |    |
| 41 |                          | ultimate authority over any of these activities                                  |    |
| 42 |                          |                                                                                  |    |
| 43 |                          |                                                                                  |    |
| 44 |                          |                                                                                  |    |
| 45 | Roles and                | <a href="#">#5d</a> Composition, roles, and responsibilities of the coordinating | 1  |
| 46 |                          |                                                                                  |    |
| 47 | responsibilities:        | centre, steering committee, endpoint adjudication                                |    |
| 48 |                          |                                                                                  |    |
| 49 | committees               | committee, data management team, and other individuals                           |    |
| 50 |                          |                                                                                  |    |
| 51 |                          | or groups overseeing the trial, if applicable (see Item 21a                      |    |
| 52 |                          |                                                                                  |    |
| 53 |                          | for data monitoring committee)                                                   |    |
| 54 |                          |                                                                                  |    |
| 55 |                          |                                                                                  |    |
| 56 |                          |                                                                                  |    |
| 57 | <b>Introduction</b>      |                                                                                  |    |
| 58 |                          |                                                                                  |    |
| 59 |                          |                                                                                  |    |
| 60 |                          |                                                                                  |    |

|    |                           |                     |                                                                   |   |
|----|---------------------------|---------------------|-------------------------------------------------------------------|---|
| 1  | Background and            | <a href="#">#6a</a> | Description of research question and justification for            | 5 |
| 2  |                           |                     |                                                                   |   |
| 3  | rationale                 |                     | undertaking the trial, including summary of relevant studies      |   |
| 4  |                           |                     | (published and unpublished) examining benefits and harms          |   |
| 5  |                           |                     | for each intervention                                             |   |
| 6  |                           |                     |                                                                   |   |
| 7  |                           |                     |                                                                   |   |
| 8  |                           |                     |                                                                   |   |
| 9  |                           |                     |                                                                   |   |
| 10 |                           |                     |                                                                   |   |
| 11 | Background and            | <a href="#">#6b</a> | Explanation for choice of comparators                             | 5 |
| 12 |                           |                     |                                                                   |   |
| 13 | rationale: choice of      |                     |                                                                   |   |
| 14 |                           |                     |                                                                   |   |
| 15 | comparators               |                     |                                                                   |   |
| 16 |                           |                     |                                                                   |   |
| 17 |                           |                     |                                                                   |   |
| 18 | Objectives                | <a href="#">#7</a>  | Specific objectives or hypotheses                                 | 6 |
| 19 |                           |                     |                                                                   |   |
| 20 |                           |                     |                                                                   |   |
| 21 |                           |                     |                                                                   |   |
| 22 | Trial design              | <a href="#">#8</a>  | Description of trial design including type of trial (eg, parallel | 6 |
| 23 |                           |                     | group, crossover, factorial, single group), allocation ratio,     |   |
| 24 |                           |                     | and framework (eg, superiority, equivalence, non-inferiority,     |   |
| 25 |                           |                     | exploratory)                                                      |   |
| 26 |                           |                     |                                                                   |   |
| 27 |                           |                     |                                                                   |   |
| 28 |                           |                     |                                                                   |   |
| 29 |                           |                     |                                                                   |   |
| 30 |                           |                     |                                                                   |   |
| 31 | <b>Methods:</b>           |                     |                                                                   |   |
| 32 |                           |                     |                                                                   |   |
| 33 | <b>Participants,</b>      |                     |                                                                   |   |
| 34 |                           |                     |                                                                   |   |
| 35 | <b>interventions, and</b> |                     |                                                                   |   |
| 36 |                           |                     |                                                                   |   |
| 37 | <b>outcomes</b>           |                     |                                                                   |   |
| 38 |                           |                     |                                                                   |   |
| 39 |                           |                     |                                                                   |   |
| 40 |                           |                     |                                                                   |   |
| 41 | Study setting             | <a href="#">#9</a>  | Description of study settings (eg, community clinic,              | 6 |
| 42 |                           |                     | academic hospital) and list of countries where data will be       |   |
| 43 |                           |                     | collected. Reference to where list of study sites can be          |   |
| 44 |                           |                     | obtained                                                          |   |
| 45 |                           |                     |                                                                   |   |
| 46 |                           |                     |                                                                   |   |
| 47 |                           |                     |                                                                   |   |
| 48 |                           |                     |                                                                   |   |
| 49 |                           |                     |                                                                   |   |
| 50 |                           |                     |                                                                   |   |
| 51 | Eligibility criteria      | <a href="#">#10</a> | Inclusion and exclusion criteria for participants. If             | 7 |
| 52 |                           |                     | applicable, eligibility criteria for study centres and            |   |
| 53 |                           |                     | individuals who will perform the interventions (eg,               |   |
| 54 |                           |                     |                                                                   |   |
| 55 |                           |                     |                                                                   |   |
| 56 |                           |                     |                                                                   |   |
| 57 |                           |                     |                                                                   |   |
| 58 |                           |                     |                                                                   |   |
| 59 |                           |                     |                                                                   |   |
| 60 |                           |                     |                                                                   |   |



surgeons, psychotherapists)

|    |                      |                      |                                                              |
|----|----------------------|----------------------|--------------------------------------------------------------|
| 1  |                      |                      |                                                              |
| 2  |                      |                      |                                                              |
| 3  |                      |                      |                                                              |
| 4  | Interventions:       | <a href="#">#11a</a> | Interventions for each group with sufficient detail to allow |
| 5  |                      |                      |                                                              |
| 6  | description          |                      | replication, including how and when they will be             |
| 7  |                      |                      |                                                              |
| 8  |                      |                      | administered                                                 |
| 9  |                      |                      |                                                              |
| 10 |                      |                      |                                                              |
| 11 | Interventions:       | <a href="#">#11b</a> | Criteria for discontinuing or modifying allocated            |
| 12 |                      |                      |                                                              |
| 13 | modifications        |                      | interventions for a given trial participant (eg, drug dose   |
| 14 |                      |                      |                                                              |
| 15 |                      |                      | change in response to harms, participant request, or         |
| 16 |                      |                      | improving / worsening disease)                               |
| 17 |                      |                      |                                                              |
| 18 |                      |                      |                                                              |
| 19 |                      |                      |                                                              |
| 20 |                      |                      |                                                              |
| 21 | Interventions:       | <a href="#">#11c</a> | Strategies to improve adherence to intervention protocols,   |
| 22 |                      |                      |                                                              |
| 23 | adherence            |                      | and any procedures for monitoring adherence (eg, drug        |
| 24 |                      |                      |                                                              |
| 25 |                      |                      | tablet return; laboratory tests)                             |
| 26 |                      |                      |                                                              |
| 27 |                      |                      |                                                              |
| 28 |                      |                      |                                                              |
| 29 | Interventions:       | <a href="#">#11d</a> | Relevant concomitant care and interventions that are         |
| 30 |                      |                      |                                                              |
| 31 | concomitant care     |                      | permitted or prohibited during the trial                     |
| 32 |                      |                      |                                                              |
| 33 |                      |                      |                                                              |
| 34 | Outcomes             | <a href="#">#12</a>  | Primary, secondary, and other outcomes, including the        |
| 35 |                      |                      |                                                              |
| 36 |                      |                      | specific measurement variable (eg, systolic blood            |
| 37 |                      |                      |                                                              |
| 38 |                      |                      | pressure), analysis metric (eg, change from baseline, final  |
| 39 |                      |                      |                                                              |
| 40 |                      |                      | value, time to event), method of aggregation (eg, median,    |
| 41 |                      |                      |                                                              |
| 42 |                      |                      | proportion), and time point for each outcome. Explanation    |
| 43 |                      |                      |                                                              |
| 44 |                      |                      | of the clinical relevance of chosen efficacy and harm        |
| 45 |                      |                      |                                                              |
| 46 |                      |                      | outcomes is strongly recommended                             |
| 47 |                      |                      |                                                              |
| 48 |                      |                      |                                                              |
| 49 |                      |                      |                                                              |
| 50 |                      |                      |                                                              |
| 51 | Participant timeline | <a href="#">#13</a>  | Time schedule of enrolment, interventions (including any     |
| 52 |                      |                      |                                                              |
| 53 |                      |                      | run-ins and washouts), assessments, and visits for           |
| 54 |                      |                      |                                                              |
| 55 |                      |                      | participants. A schematic diagram is highly recommended      |
| 56 |                      |                      |                                                              |
| 57 |                      |                      | (see Figure)                                                 |
| 58 |                      |                      |                                                              |
| 59 |                      |                      |                                                              |
| 60 |                      |                      |                                                              |

|    |                              |                      |                                                              |    |
|----|------------------------------|----------------------|--------------------------------------------------------------|----|
| 1  | Sample size                  | <a href="#">#14</a>  | Estimated number of participants needed to achieve study     | 13 |
| 2  |                              |                      | objectives and how it was determined, including clinical and |    |
| 3  |                              |                      | statistical assumptions supporting any sample size           |    |
| 4  |                              |                      | calculations                                                 |    |
| 5  |                              |                      |                                                              |    |
| 6  |                              |                      |                                                              |    |
| 7  |                              |                      |                                                              |    |
| 8  |                              |                      |                                                              |    |
| 9  |                              |                      |                                                              |    |
| 10 |                              |                      |                                                              |    |
| 11 | Recruitment                  | <a href="#">#15</a>  | Strategies for achieving adequate participant enrolment to   | 11 |
| 12 |                              |                      | reach target sample size                                     |    |
| 13 |                              |                      |                                                              |    |
| 14 |                              |                      |                                                              |    |
| 15 |                              |                      |                                                              |    |
| 16 | <b>Methods: Assignment</b>   |                      |                                                              |    |
| 17 | <b>of interventions (for</b> |                      |                                                              |    |
| 18 | <b>controlled trials)</b>    |                      |                                                              |    |
| 19 |                              |                      |                                                              |    |
| 20 |                              |                      |                                                              |    |
| 21 |                              |                      |                                                              |    |
| 22 |                              |                      |                                                              |    |
| 23 |                              |                      |                                                              |    |
| 24 | Allocation: sequence         | <a href="#">#16a</a> | Method of generating the allocation sequence (eg,            | 12 |
| 25 | generation                   |                      | computer-generated random numbers), and list of any          |    |
| 26 |                              |                      | factors for stratification. To reduce predictability of a    |    |
| 27 |                              |                      | random sequence, details of any planned restriction (eg,     |    |
| 28 |                              |                      | blocking) should be provided in a separate document that is  |    |
| 29 |                              |                      | unavailable to those who enrol participants or assign        |    |
| 30 |                              |                      | interventions                                                |    |
| 31 |                              |                      |                                                              |    |
| 32 |                              |                      |                                                              |    |
| 33 |                              |                      |                                                              |    |
| 34 |                              |                      |                                                              |    |
| 35 |                              |                      |                                                              |    |
| 36 |                              |                      |                                                              |    |
| 37 |                              |                      |                                                              |    |
| 38 |                              |                      |                                                              |    |
| 39 |                              |                      |                                                              |    |
| 40 |                              |                      |                                                              |    |
| 41 | Allocation                   | <a href="#">#16b</a> | Mechanism of implementing the allocation sequence (eg,       | 12 |
| 42 | concealment                  |                      | central telephone; sequentially numbered, opaque, sealed     |    |
| 43 | mechanism                    |                      | envelopes), describing any steps to conceal the sequence     |    |
| 44 |                              |                      | until interventions are assigned                             |    |
| 45 |                              |                      |                                                              |    |
| 46 |                              |                      |                                                              |    |
| 47 |                              |                      |                                                              |    |
| 48 |                              |                      |                                                              |    |
| 49 |                              |                      |                                                              |    |
| 50 |                              |                      |                                                              |    |
| 51 | Allocation:                  | <a href="#">#16c</a> | Who will generate the allocation sequence, who will enrol    | 13 |
| 52 | implementation               |                      | participants, and who will assign participants to            |    |
| 53 |                              |                      | interventions                                                |    |
| 54 |                              |                      |                                                              |    |
| 55 |                              |                      |                                                              |    |
| 56 |                              |                      |                                                              |    |
| 57 |                              |                      |                                                              |    |
| 58 |                              |                      |                                                              |    |
| 59 |                              |                      |                                                              |    |
| 60 |                              |                      |                                                              |    |

|    |                        |                      |                                                                |    |
|----|------------------------|----------------------|----------------------------------------------------------------|----|
| 1  | Blinding (masking)     | <a href="#">#17a</a> | Who will be blinded after assignment to interventions (eg,     | 11 |
| 2  |                        |                      | trial participants, care providers, outcome assessors, data    |    |
| 3  |                        |                      | analysts), and how                                             |    |
| 4  |                        |                      |                                                                |    |
| 5  |                        |                      |                                                                |    |
| 6  |                        |                      |                                                                |    |
| 7  |                        |                      |                                                                |    |
| 8  | Blinding (masking):    | <a href="#">#17b</a> | If blinded, circumstances under which unblinding is            | 11 |
| 9  | emergency              |                      | permissible, and procedure for revealing a participant's       |    |
| 10 |                        |                      | allocated intervention during the trial                        |    |
| 11 | unblinding             |                      |                                                                |    |
| 12 |                        |                      |                                                                |    |
| 13 |                        |                      |                                                                |    |
| 14 |                        |                      |                                                                |    |
| 15 |                        |                      |                                                                |    |
| 16 | <b>Methods: Data</b>   |                      |                                                                |    |
| 17 | <b>collection,</b>     |                      |                                                                |    |
| 18 | <b>management, and</b> |                      |                                                                |    |
| 19 | <b>analysis</b>        |                      |                                                                |    |
| 20 |                        |                      |                                                                |    |
| 21 |                        |                      |                                                                |    |
| 22 |                        |                      |                                                                |    |
| 23 |                        |                      |                                                                |    |
| 24 |                        |                      |                                                                |    |
| 25 |                        |                      |                                                                |    |
| 26 | Data collection plan   | <a href="#">#18a</a> | Plans for assessment and collection of outcome, baseline,      | 13 |
| 27 |                        |                      | and other trial data, including any related processes to       |    |
| 28 |                        |                      | promote data quality (eg, duplicate measurements, training     |    |
| 29 |                        |                      | of assessors) and a description of study instruments (eg,      |    |
| 30 |                        |                      | questionnaires, laboratory tests) along with their reliability |    |
| 31 |                        |                      | and validity, if known. Reference to where data collection     |    |
| 32 |                        |                      | forms can be found, if not in the protocol                     |    |
| 33 |                        |                      |                                                                |    |
| 34 |                        |                      |                                                                |    |
| 35 |                        |                      |                                                                |    |
| 36 |                        |                      |                                                                |    |
| 37 |                        |                      |                                                                |    |
| 38 |                        |                      |                                                                |    |
| 39 |                        |                      |                                                                |    |
| 40 |                        |                      |                                                                |    |
| 41 |                        |                      |                                                                |    |
| 42 |                        |                      |                                                                |    |
| 43 | Data collection plan:  | <a href="#">#18b</a> | Plans to promote participant retention and complete follow-    | 13 |
| 44 | retention              |                      | up, including list of any outcome data to be collected for     |    |
| 45 |                        |                      | participants who discontinue or deviate from intervention      |    |
| 46 |                        |                      | protocols                                                      |    |
| 47 |                        |                      |                                                                |    |
| 48 |                        |                      |                                                                |    |
| 49 |                        |                      |                                                                |    |
| 50 |                        |                      |                                                                |    |
| 51 |                        |                      |                                                                |    |
| 52 |                        |                      |                                                                |    |
| 53 | Data management        | <a href="#">#19</a>  | Plans for data entry, coding, security, and storage,           | 13 |
| 54 |                        |                      | including any related processes to promote data quality        |    |
| 55 |                        |                      | (eg, double data entry; range checks for data values).         |    |
| 56 |                        |                      |                                                                |    |
| 57 |                        |                      |                                                                |    |
| 58 |                        |                      |                                                                |    |
| 59 |                        |                      |                                                                |    |
| 60 |                        |                      |                                                                |    |

|    |                            |                                                                                  |    |
|----|----------------------------|----------------------------------------------------------------------------------|----|
| 1  |                            | Reference to where details of data management                                    |    |
| 2  |                            |                                                                                  |    |
| 3  |                            | procedures can be found, if not in the protocol                                  |    |
| 4  |                            |                                                                                  |    |
| 5  |                            |                                                                                  |    |
| 6  | Statistics: outcomes       | <a href="#">#20a</a> Statistical methods for analysing primary and secondary     | 13 |
| 7  |                            |                                                                                  |    |
| 8  |                            | outcomes. Reference to where other details of the                                |    |
| 9  |                            |                                                                                  |    |
| 10 |                            | statistical analysis plan can be found, if not in the protocol                   |    |
| 11 |                            |                                                                                  |    |
| 12 |                            |                                                                                  |    |
| 13 | Statistics: additional     | <a href="#">#20b</a> Methods for any additional analyses (eg, subgroup and       | 13 |
| 14 |                            |                                                                                  |    |
| 15 | analyses                   | adjusted analyses)                                                               |    |
| 16 |                            |                                                                                  |    |
| 17 |                            |                                                                                  |    |
| 18 | Statistics: analysis       | <a href="#">#20c</a> Definition of analysis population relating to protocol non- | 13 |
| 19 |                            |                                                                                  |    |
| 20 | population and             | adherence (eg, as randomised analysis), and any statistical                      |    |
| 21 |                            |                                                                                  |    |
| 22 | missing data               | methods to handle missing data (eg, multiple imputation)                         |    |
| 23 |                            |                                                                                  |    |
| 24 |                            |                                                                                  |    |
| 25 |                            |                                                                                  |    |
| 26 | <b>Methods: Monitoring</b> |                                                                                  |    |
| 27 |                            |                                                                                  |    |
| 28 |                            |                                                                                  |    |
| 29 | Data monitoring:           | <a href="#">#21a</a> Composition of data monitoring committee (DMC);             | 15 |
| 30 |                            |                                                                                  |    |
| 31 | formal committee           | summary of its role and reporting structure; statement of                        |    |
| 32 |                            |                                                                                  |    |
| 33 |                            | whether it is independent from the sponsor and competing                         |    |
| 34 |                            |                                                                                  |    |
| 35 |                            | interests; and reference to where further details about its                      |    |
| 36 |                            |                                                                                  |    |
| 37 |                            | charter can be found, if not in the protocol. Alternatively, an                  |    |
| 38 |                            |                                                                                  |    |
| 39 |                            | explanation of why a DMC is not needed                                           |    |
| 40 |                            |                                                                                  |    |
| 41 |                            |                                                                                  |    |
| 42 |                            |                                                                                  |    |
| 43 |                            |                                                                                  |    |
| 44 | Data monitoring:           | <a href="#">#21b</a> Description of any interim analyses and stopping            | 15 |
| 45 |                            |                                                                                  |    |
| 46 | interim analysis           | guidelines, including who will have access to these interim                      |    |
| 47 |                            |                                                                                  |    |
| 48 |                            | results and make the final decision to terminate the trial                       |    |
| 49 |                            |                                                                                  |    |
| 50 |                            |                                                                                  |    |
| 51 | Harms                      | <a href="#">#22</a> Plans for collecting, assessing, reporting, and managing     | 12 |
| 52 |                            |                                                                                  |    |
| 53 |                            | solicited and spontaneously reported adverse events and                          |    |
| 54 |                            |                                                                                  |    |
| 55 |                            | other unintended effects of trial interventions or trial                         |    |
| 56 |                            |                                                                                  |    |
| 57 |                            |                                                                                  |    |
| 58 |                            |                                                                                  |    |
| 59 |                            |                                                                                  |    |
| 60 |                            |                                                                                  |    |

|    |                      |                                                                                  |     |
|----|----------------------|----------------------------------------------------------------------------------|-----|
| 1  |                      | conduct                                                                          |     |
| 2  |                      |                                                                                  |     |
| 3  |                      |                                                                                  |     |
| 4  | Auditing             | <a href="#">#23</a> Frequency and procedures for auditing trial conduct, if any, | 14  |
| 5  |                      |                                                                                  |     |
| 6  |                      | and whether the process will be independent from                                 |     |
| 7  |                      |                                                                                  |     |
| 8  |                      | investigators and the sponsor                                                    |     |
| 9  |                      |                                                                                  |     |
| 10 |                      |                                                                                  |     |
| 11 | <b>Ethics and</b>    |                                                                                  |     |
| 12 |                      |                                                                                  |     |
| 13 | <b>dissemination</b> |                                                                                  |     |
| 14 |                      |                                                                                  |     |
| 15 |                      |                                                                                  |     |
| 16 | Research ethics      | <a href="#">#24</a> Plans for seeking research ethics committee / institutional  | 15  |
| 17 |                      |                                                                                  |     |
| 18 | approval             | review board (REC / IRB) approval                                                |     |
| 19 |                      |                                                                                  |     |
| 20 |                      |                                                                                  |     |
| 21 | Protocol             | <a href="#">#25</a> Plans for communicating important protocol modifications     | 15  |
| 22 |                      |                                                                                  |     |
| 23 | amendments           | (eg, changes to eligibility criteria, outcomes, analyses) to                     |     |
| 24 |                      | relevant parties (eg, investigators, REC / IRBs, trial                           |     |
| 25 |                      | participants, trial registries, journals, regulators)                            |     |
| 26 |                      |                                                                                  |     |
| 27 |                      |                                                                                  |     |
| 28 |                      |                                                                                  |     |
| 29 |                      |                                                                                  |     |
| 30 |                      |                                                                                  |     |
| 31 | Consent or assent    | <a href="#">#26a</a> Who will obtain informed consent or assent from potential   | 15  |
| 32 |                      |                                                                                  |     |
| 33 |                      | trial participants or authorised surrogates, and how (see                        |     |
| 34 |                      |                                                                                  |     |
| 35 |                      | Item 32)                                                                         |     |
| 36 |                      |                                                                                  |     |
| 37 |                      |                                                                                  |     |
| 38 |                      |                                                                                  |     |
| 39 | Consent or assent:   | <a href="#">#26b</a> Additional consent provisions for collection and use of     | n/a |
| 40 |                      |                                                                                  |     |
| 41 | ancillary studies    | participant data and biological specimens in ancillary                           |     |
| 42 |                      |                                                                                  |     |
| 43 |                      | studies, if applicable                                                           |     |
| 44 |                      |                                                                                  |     |
| 45 |                      |                                                                                  |     |
| 46 |                      |                                                                                  |     |
| 47 | Confidentiality      | <a href="#">#27</a> How personal information about potential and enrolled        | 16  |
| 48 |                      |                                                                                  |     |
| 49 |                      | participants will be collected, shared, and maintained in                        |     |
| 50 |                      |                                                                                  |     |
| 51 |                      | order to protect confidentiality before, during, and after the                   |     |
| 52 |                      |                                                                                  |     |
| 53 |                      | trial                                                                            |     |
| 54 |                      |                                                                                  |     |
| 55 |                      |                                                                                  |     |
| 56 |                      |                                                                                  |     |
| 57 | Declaration of       | <a href="#">#28</a> Financial and other competing interests for principal        | 17  |
| 58 |                      |                                                                                  |     |
| 59 |                      |                                                                                  |     |
| 60 |                      |                                                                                  |     |

|    |                       |                      |                                                                 |     |
|----|-----------------------|----------------------|-----------------------------------------------------------------|-----|
| 1  | interests             |                      | investigators for the overall trial and each study site         |     |
| 2  |                       |                      |                                                                 |     |
| 3  |                       |                      |                                                                 |     |
| 4  | Data access           | <a href="#">#29</a>  | Statement of who will have access to the final trial dataset,   | 16  |
| 5  |                       |                      | and disclosure of contractual agreements that limit such        |     |
| 6  |                       |                      | access for investigators                                        |     |
| 7  |                       |                      |                                                                 |     |
| 8  |                       |                      |                                                                 |     |
| 9  |                       |                      |                                                                 |     |
| 10 |                       |                      |                                                                 |     |
| 11 | Ancillary and post    | <a href="#">#30</a>  | Provisions, if any, for ancillary and post-trial care, and for  | n/a |
| 12 |                       |                      | compensation to those who suffer harm from trial                |     |
| 13 | trial care            |                      | participation                                                   |     |
| 14 |                       |                      |                                                                 |     |
| 15 |                       |                      |                                                                 |     |
| 16 |                       |                      |                                                                 |     |
| 17 |                       |                      |                                                                 |     |
| 18 |                       |                      |                                                                 |     |
| 19 | Dissemination policy: | <a href="#">#31a</a> | Plans for investigators and sponsor to communicate trial        | 16  |
| 20 |                       |                      | results to participants, healthcare professionals, the public,  |     |
| 21 | trial results         |                      | and other relevant groups (eg, via publication, reporting in    |     |
| 22 |                       |                      | results databases, or other data sharing arrangements),         |     |
| 23 |                       |                      | including any publication restrictions                          |     |
| 24 |                       |                      |                                                                 |     |
| 25 |                       |                      |                                                                 |     |
| 26 |                       |                      |                                                                 |     |
| 27 |                       |                      |                                                                 |     |
| 28 |                       |                      |                                                                 |     |
| 29 |                       |                      |                                                                 |     |
| 30 |                       |                      |                                                                 |     |
| 31 | Dissemination policy: | <a href="#">#31b</a> | Authorship eligibility guidelines and any intended use of       | 16  |
| 32 |                       |                      | professional writers                                            |     |
| 33 | authorship            |                      |                                                                 |     |
| 34 |                       |                      |                                                                 |     |
| 35 |                       |                      |                                                                 |     |
| 36 | Dissemination policy: | <a href="#">#31c</a> | Plans, if any, for granting public access to the full protocol, | n/a |
| 37 |                       |                      | participant-level dataset, and statistical code                 |     |
| 38 | reproducible research |                      |                                                                 |     |
| 39 |                       |                      |                                                                 |     |
| 40 |                       |                      |                                                                 |     |
| 41 |                       |                      |                                                                 |     |
| 42 | <b>Appendices</b>     |                      |                                                                 |     |
| 43 |                       |                      |                                                                 |     |
| 44 |                       |                      |                                                                 |     |
| 45 | Informed consent      | <a href="#">#32</a>  | Model consent form and other related documentation given        | n/a |
| 46 |                       |                      | to participants and authorised surrogates                       |     |
| 47 | materials             |                      |                                                                 |     |
| 48 |                       |                      |                                                                 |     |
| 49 |                       |                      |                                                                 |     |
| 50 | Biological specimens  | <a href="#">#33</a>  | Plans for collection, laboratory evaluation, and storage of     | n/a |
| 51 |                       |                      | biological specimens for genetic or molecular analysis in       |     |
| 52 |                       |                      | the current trial and for future use in ancillary studies, if   |     |
| 53 |                       |                      | applicable                                                      |     |
| 54 |                       |                      |                                                                 |     |
| 55 |                       |                      |                                                                 |     |
| 56 |                       |                      |                                                                 |     |
| 57 |                       |                      |                                                                 |     |
| 58 |                       |                      |                                                                 |     |
| 59 |                       |                      |                                                                 |     |
| 60 |                       |                      |                                                                 |     |

1 The SPIRIT Explanation and Elaboration paper is distributed under the terms of the Creative  
2 Commons Attribution License CC-BY-NC. This checklist was completed on 04. March 2022 using  
3 <https://www.goodreports.org/>, a tool made by the [EQUATOR Network](#) in collaboration with  
4 [Penelope.ai](#)  
5  
6  
7  
8  
9  
10  
11  
12  
13  
14  
15  
16  
17  
18  
19  
20  
21  
22  
23  
24  
25  
26  
27  
28  
29  
30  
31  
32  
33  
34  
35  
36  
37  
38  
39  
40  
41  
42  
43  
44  
45  
46  
47  
48  
49  
50  
51  
52  
53  
54  
55  
56  
57  
58  
59  
60
